# Supplementary material for: Mesostigma viride Genome and Transcriptome Provide Insights into the Origin and Evolution of Streptophyta
Source: PubMed Central journal article supplement (PMC6947507; doi:10.1002/advs.201901850), 2019-10-24
Supplement: ADVS-7-1901850-s002.pdf [file ADVS-7-1901850-s002.pdf]

**Data S1.** Phylogenetic trees.

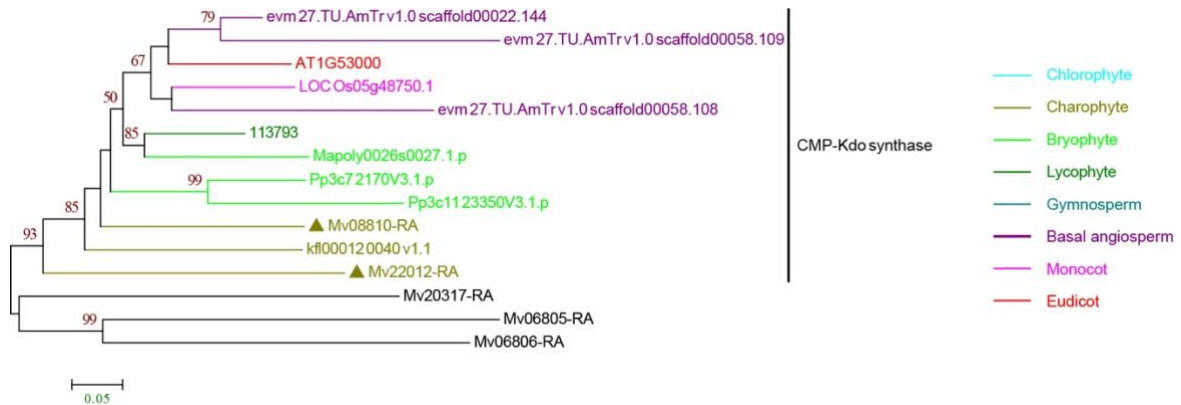

**Data S1A.** Phylogenetic relationships of CMP-Kdo synthetase proteins from *M. viride* and other evolutionarily representative species. The *M. viride* sequences were highlighted by triangles. Numbers on the major branches indicate bootstrap values (> 50%) in 1,000 replicates.

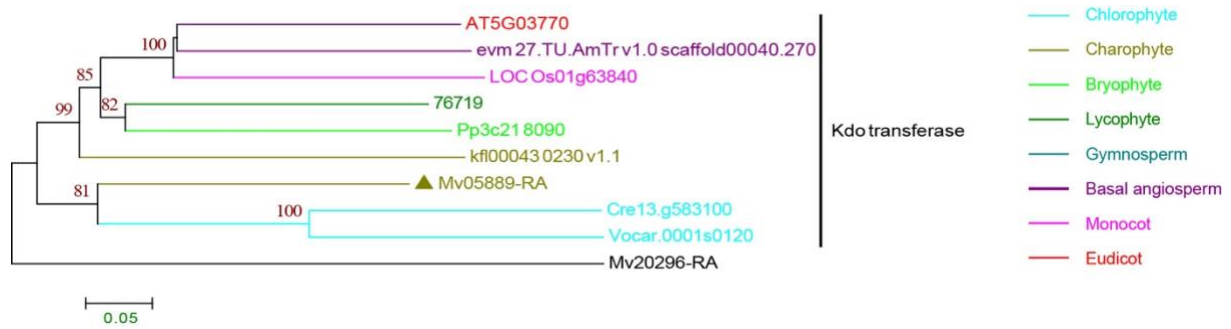

**Data S1B.** Phylogenetic relationships of Kdo transferase proteins from *M. viride* and other evolutionarily representative species. The *M. viride* sequences were highlighted by triangles. Numbers on the major branches indicate bootstrap values (> 50%) in 1,000 replicates.

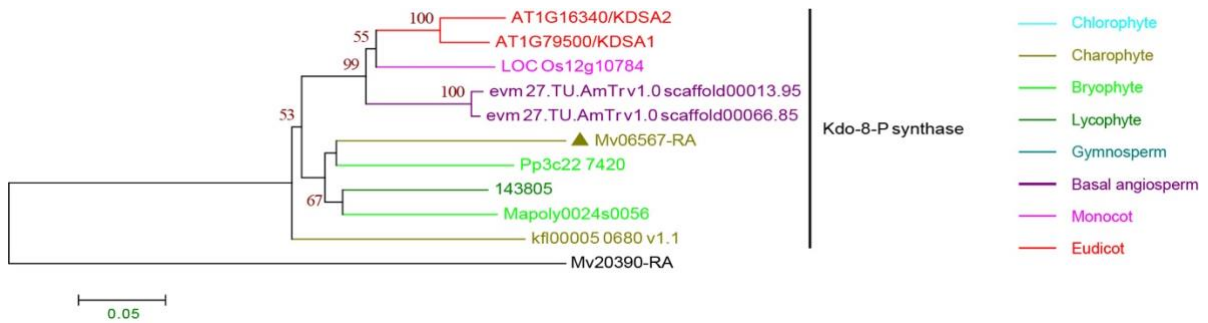

**Data S1C.** Phylogenetic relationships of Kdo-8-phosphate (Kdo-8-p) synthase proteins from *M. viride* and other evolutionarily representative species. The *M. viride* sequences were highlighted by triangles. Numbers on the major branches indicate bootstrap values (> 50%) in 1,000 replicates.

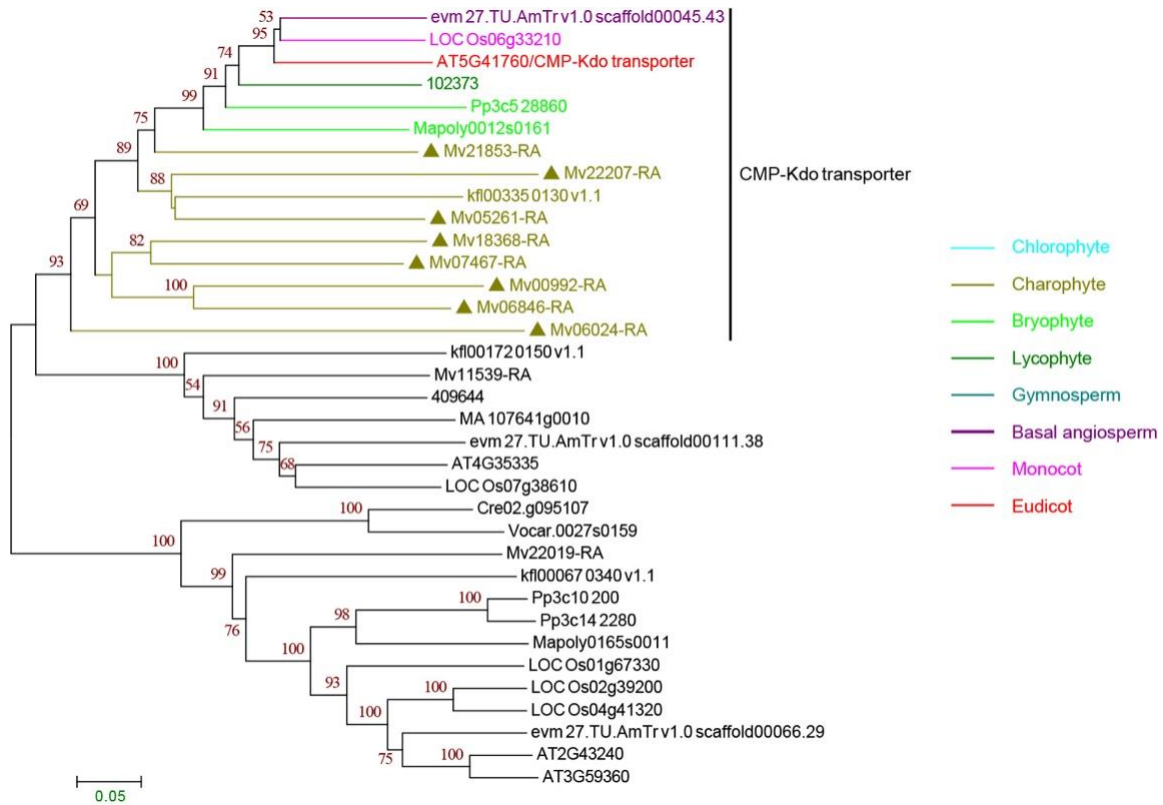

**Data S1D.** Phylogenetic relationships of CMP-Kdo transporter proteins from *M. viride* and other evolutionarily representative species. The *M. viride* sequences were highlighted by triangles. Numbers on the major branches indicate bootstrap values (> 50%) in 1,000 replicates.

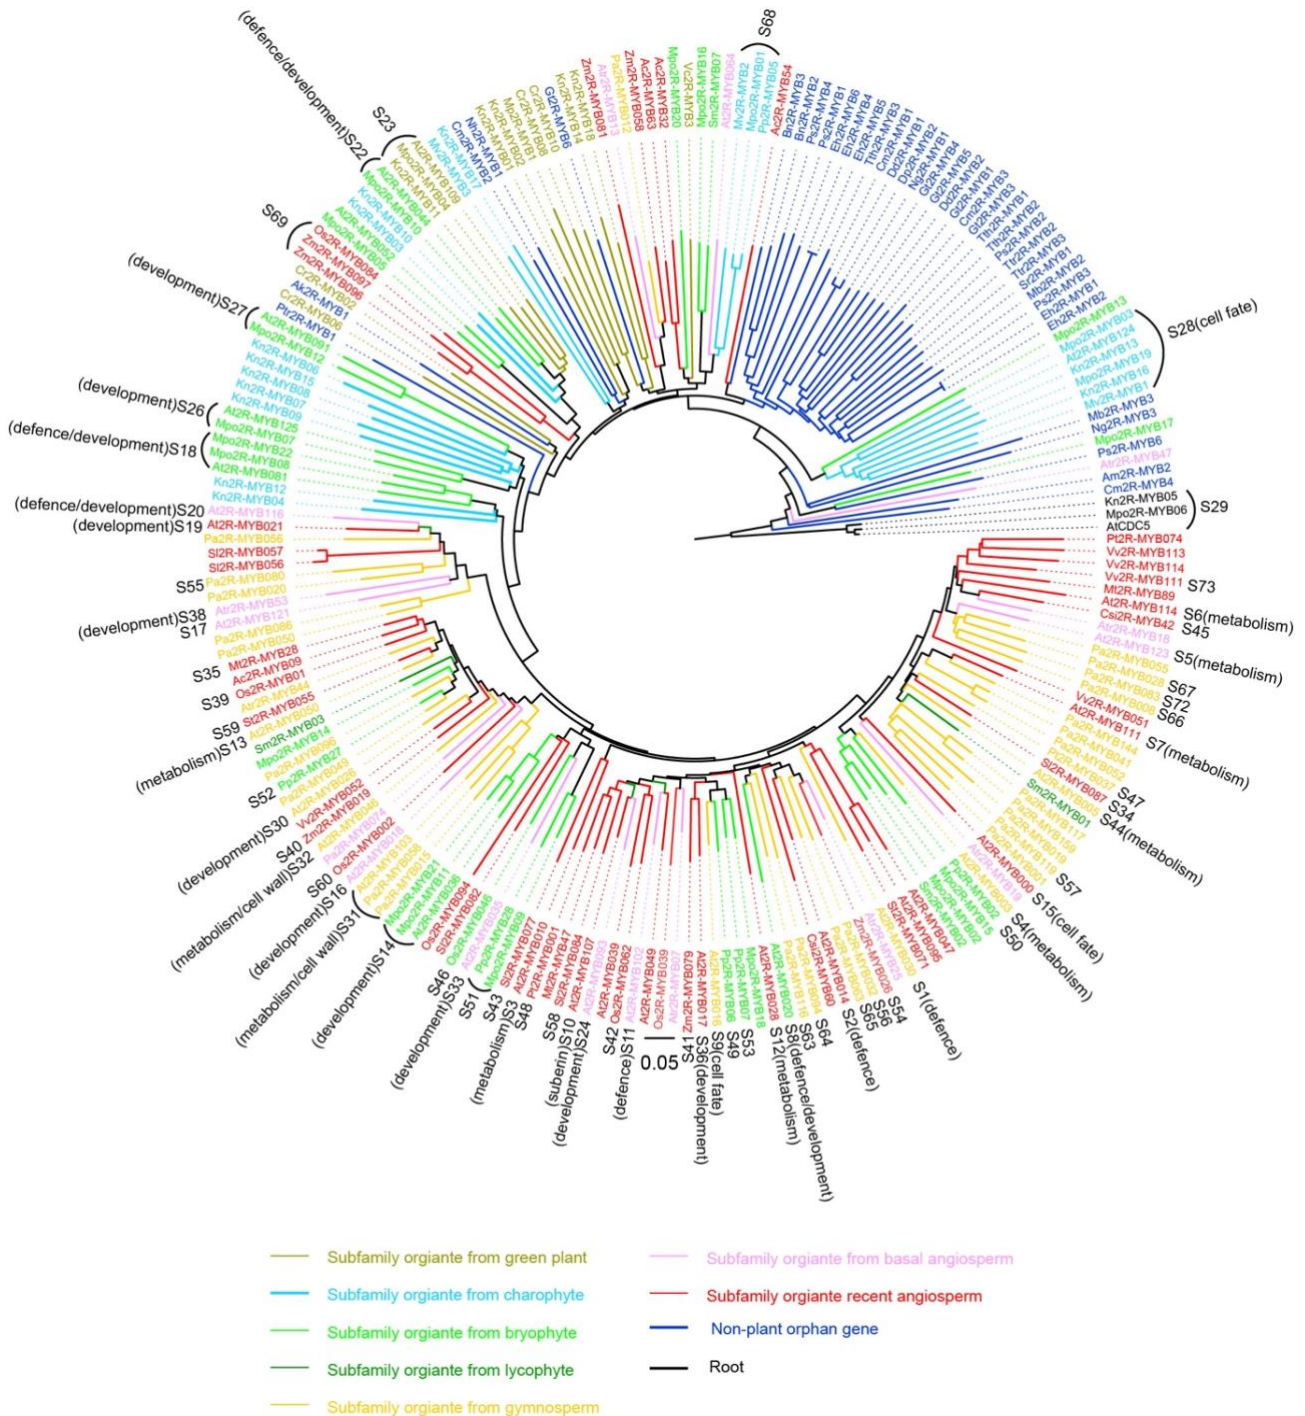

**Data S1E.** Phylogenetic relationships of R2R3-MYB TFs. The R2R3-MYB neighbor-joining (NJ) phylogenetic tree includes representative sequences from previously identified 73 subfamilies and 95 non-plant orphan genes based on 50 eukaryotes,<sup>[1]</sup> and all R2R3-MYB proteins from *K. nitens*, *M. polymorpha*, and *M. viride*. The subfamily names and related functions were indicated. The three shows that *M. viride* proteins (Mv2R-MYB1-3) belong to the subfamilies of S28, S68 and one yet-to-be defined subfamily, respectively.

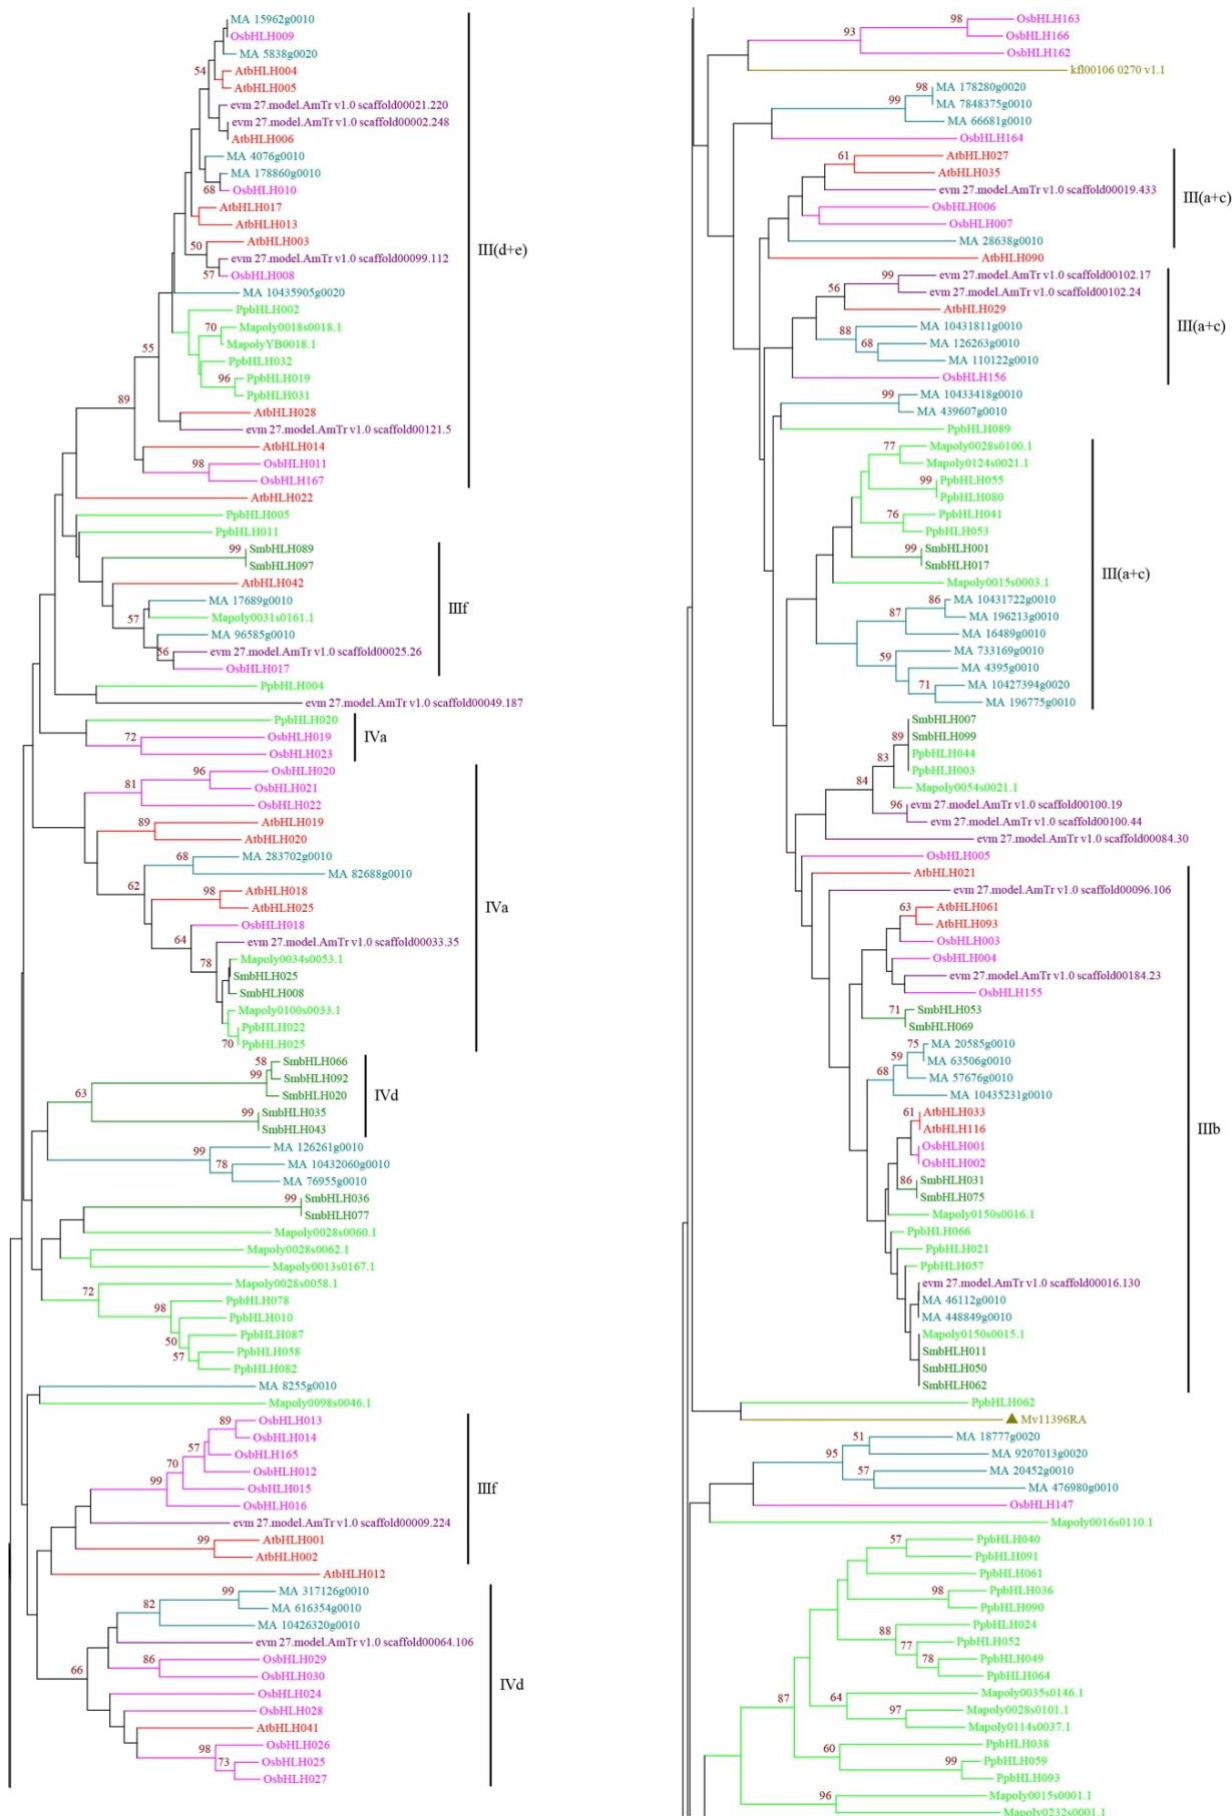

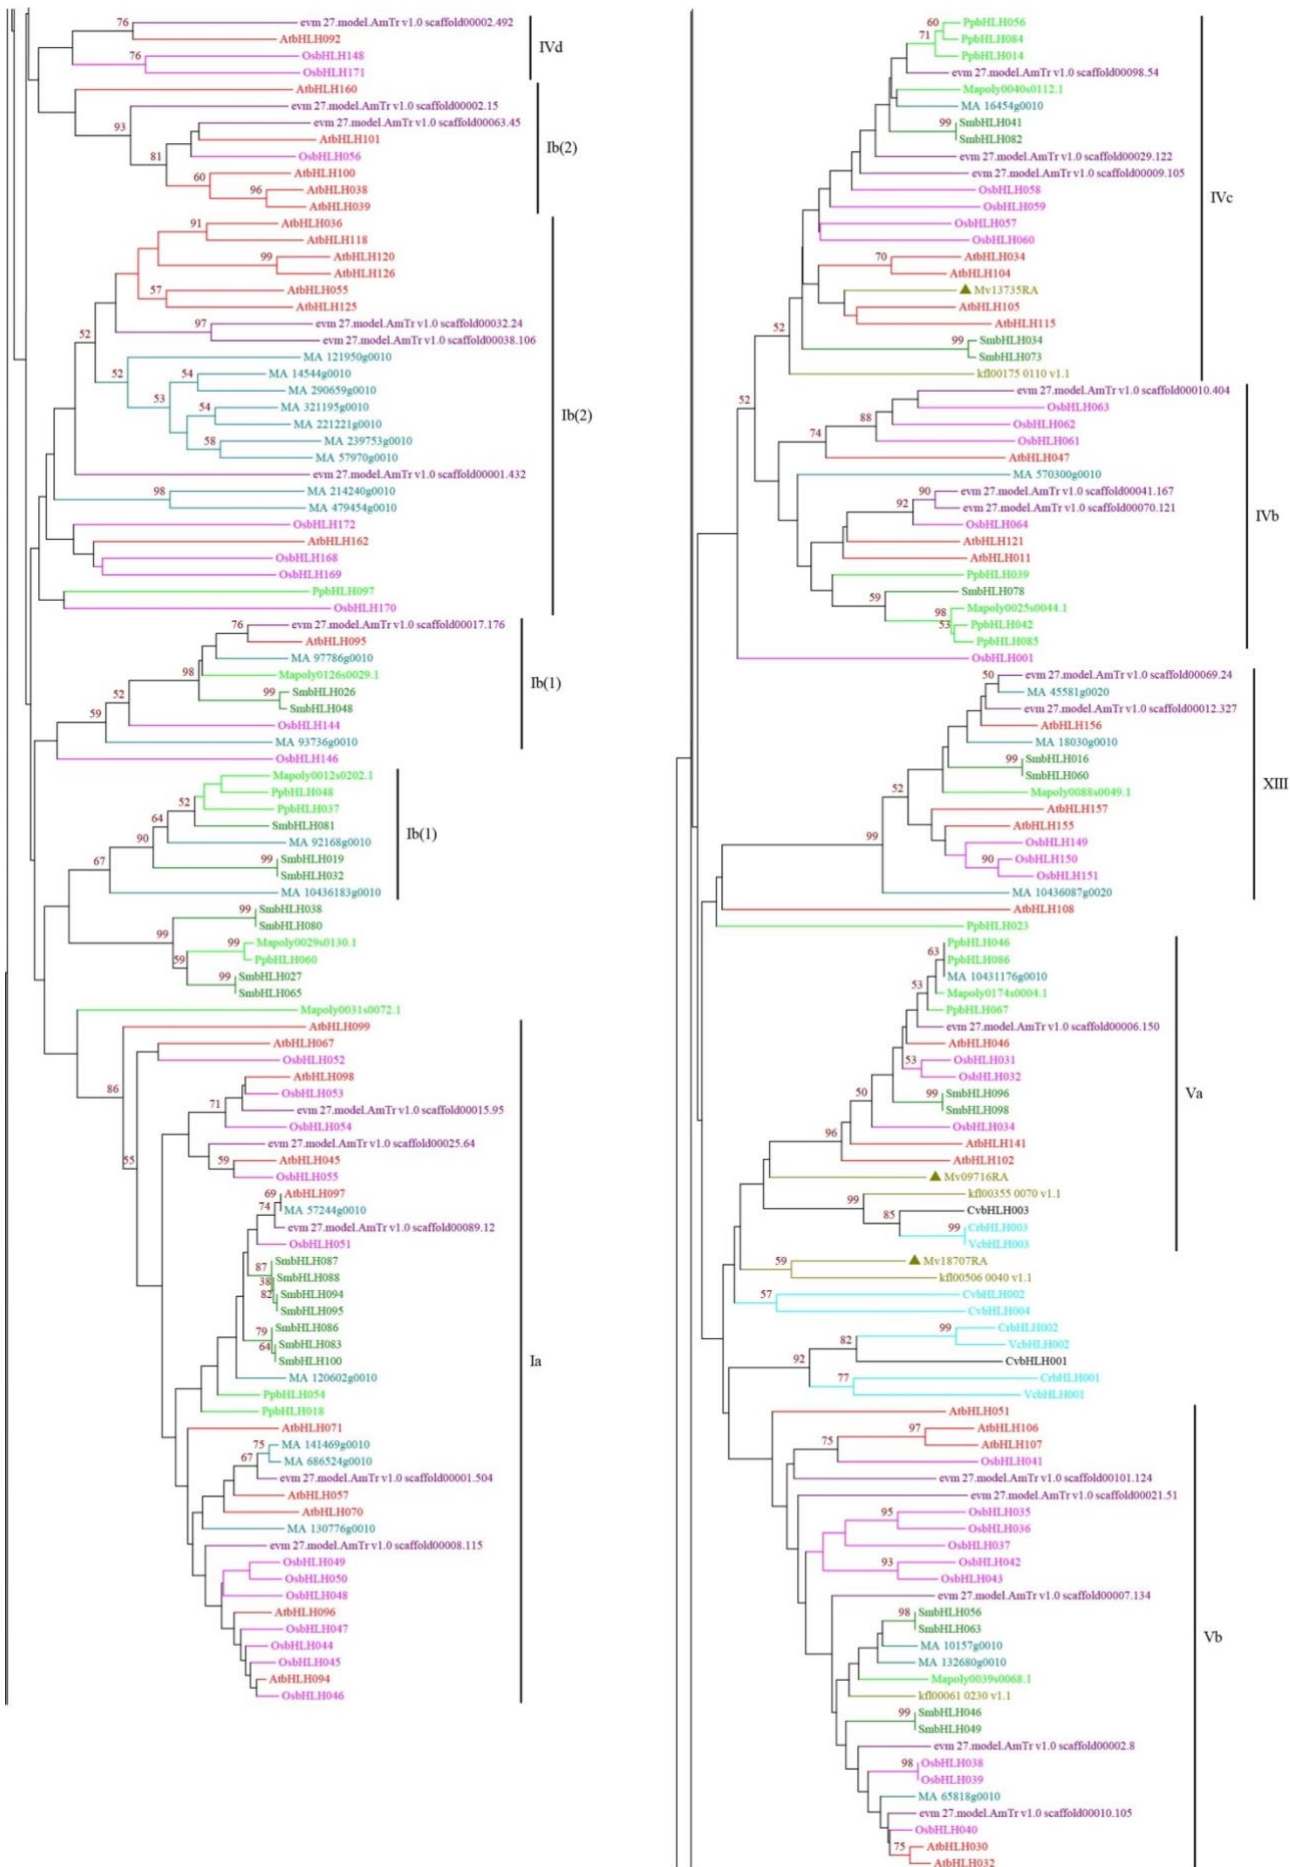

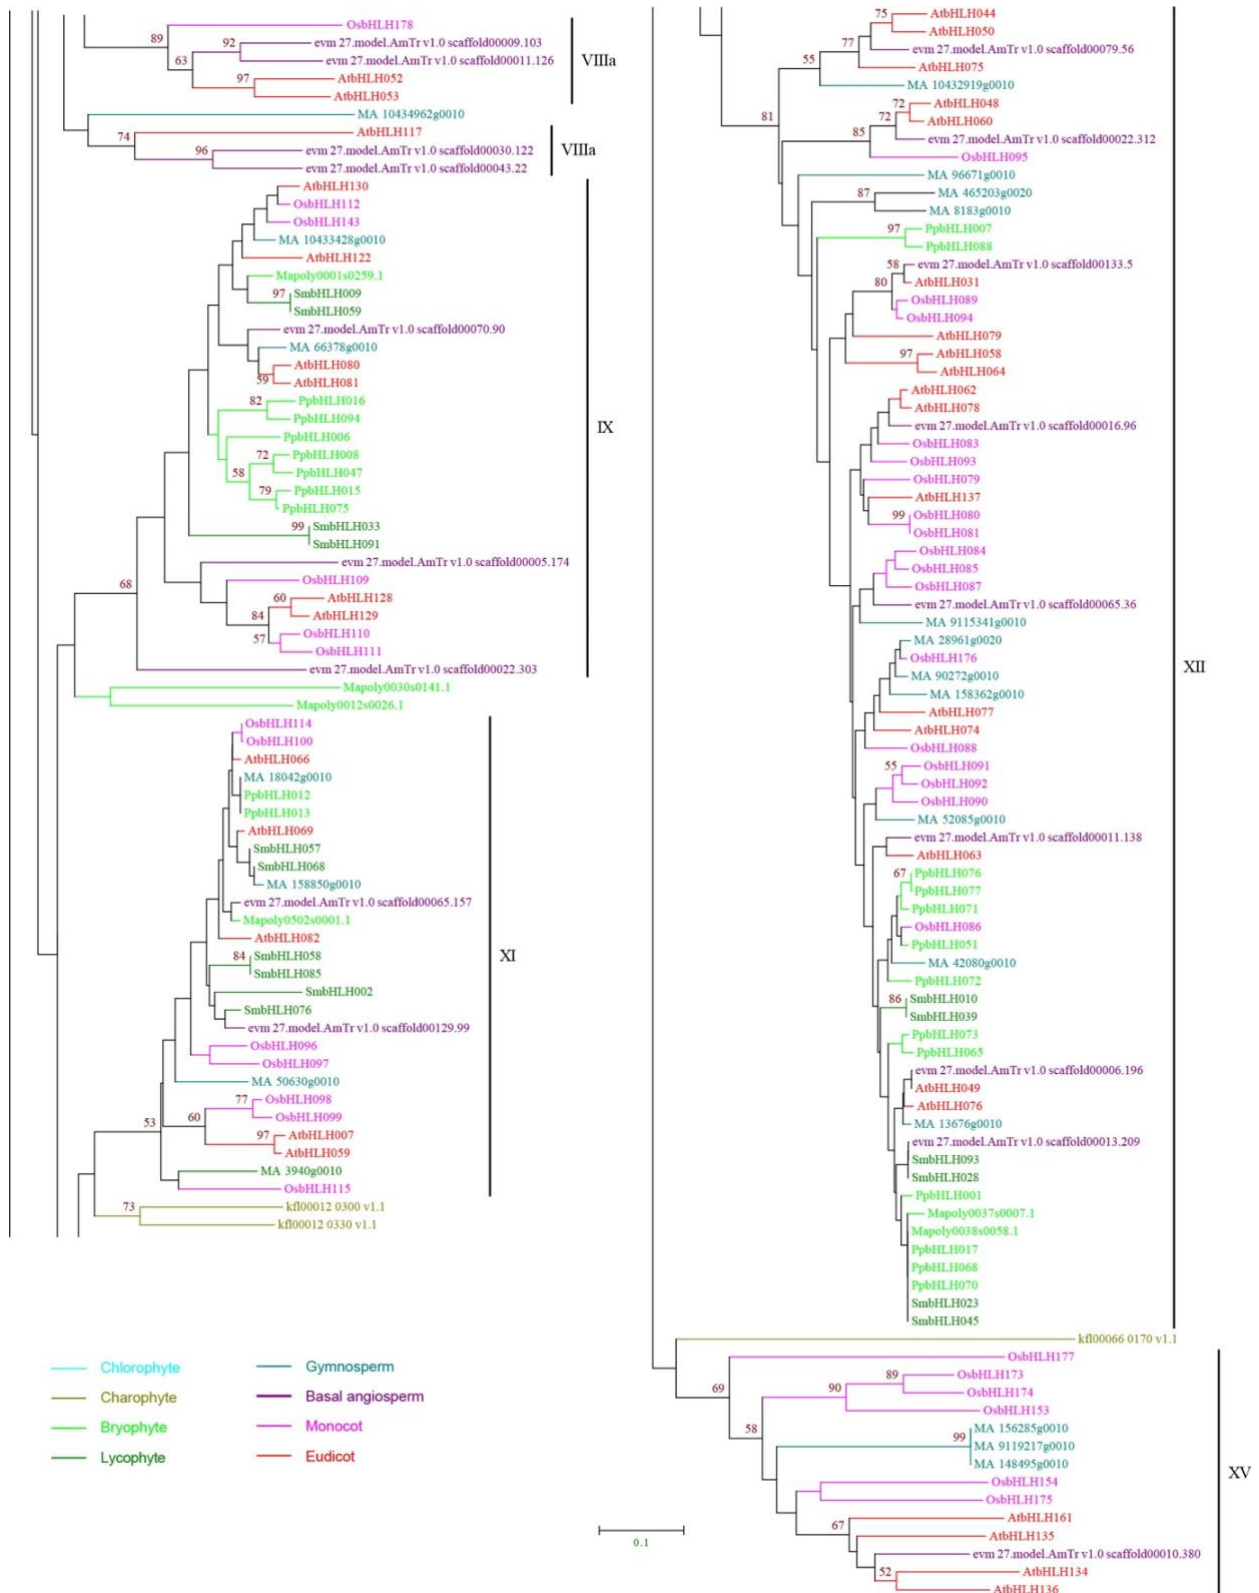

**Data S1F.** Phylogenetic relationships of basic helix-loop-helix (bHLH) TFs from *M. viride* and 10 evolutionarily representative species. The *M. viride* sequences were highlighted by triangles. Numbers on the major branches indicate bootstrap values (> 50%) in 1,000 replicates. The classification/clade was named according to a previous study.[2]





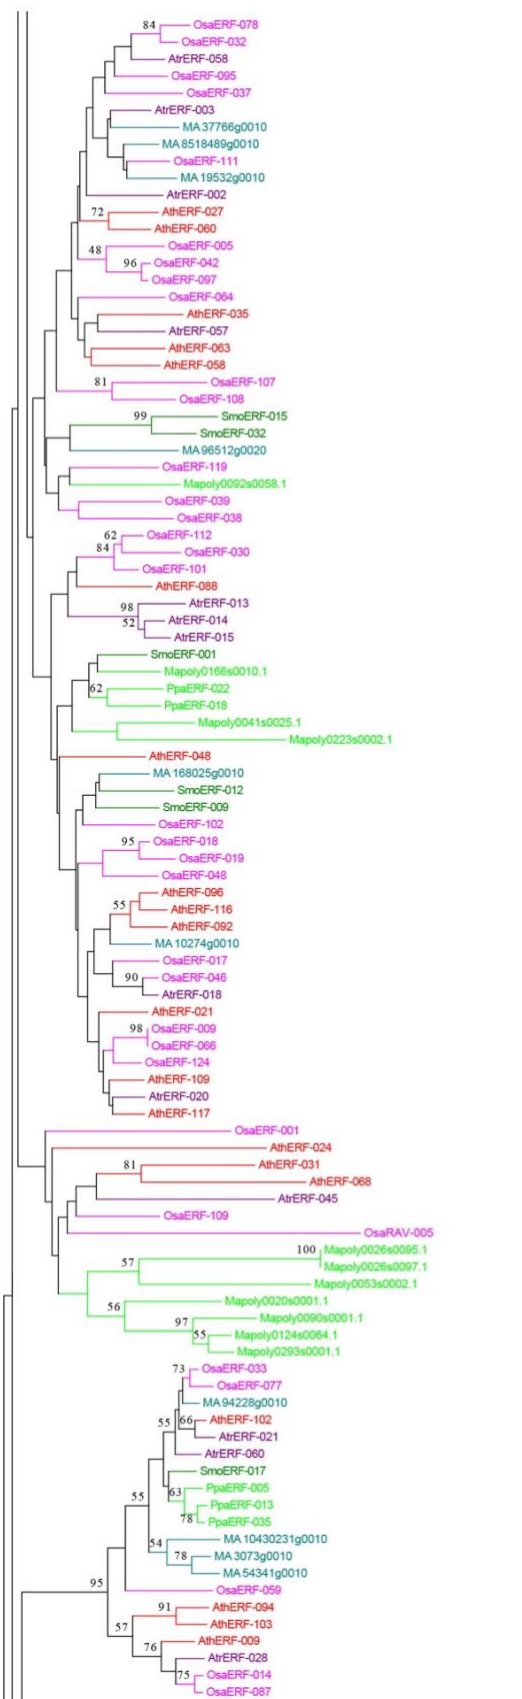

ERF

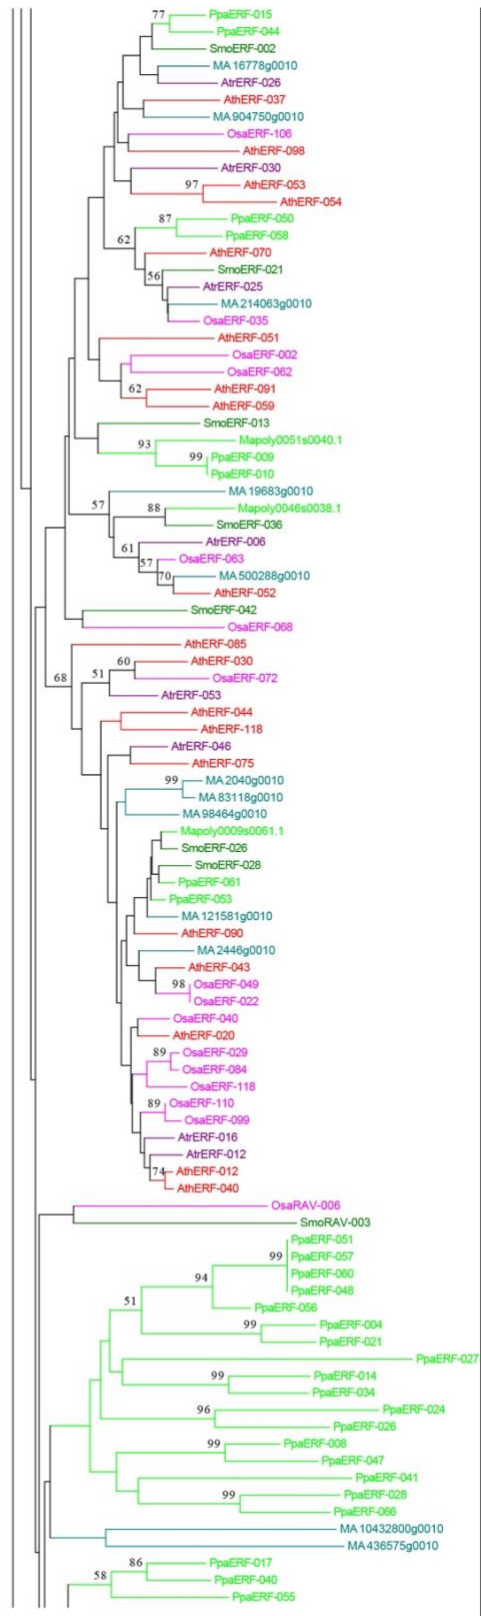

ERF

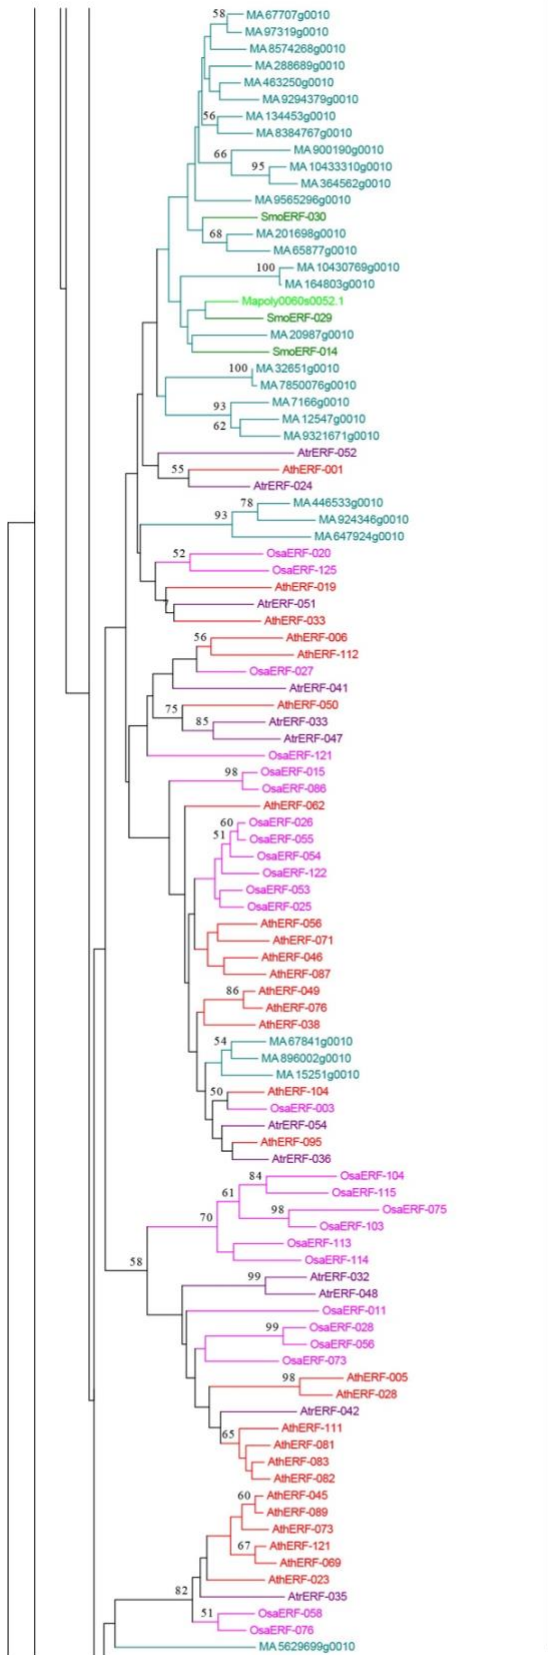

ERF

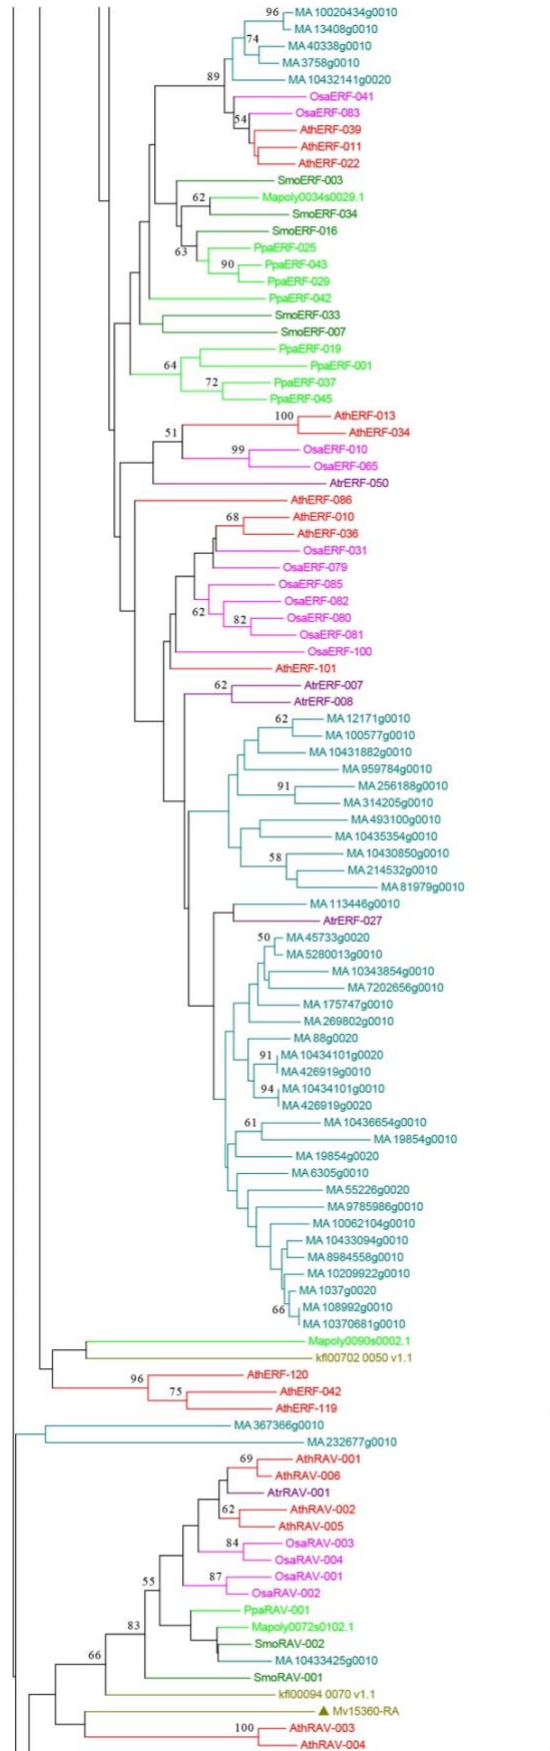

ERF

RAV

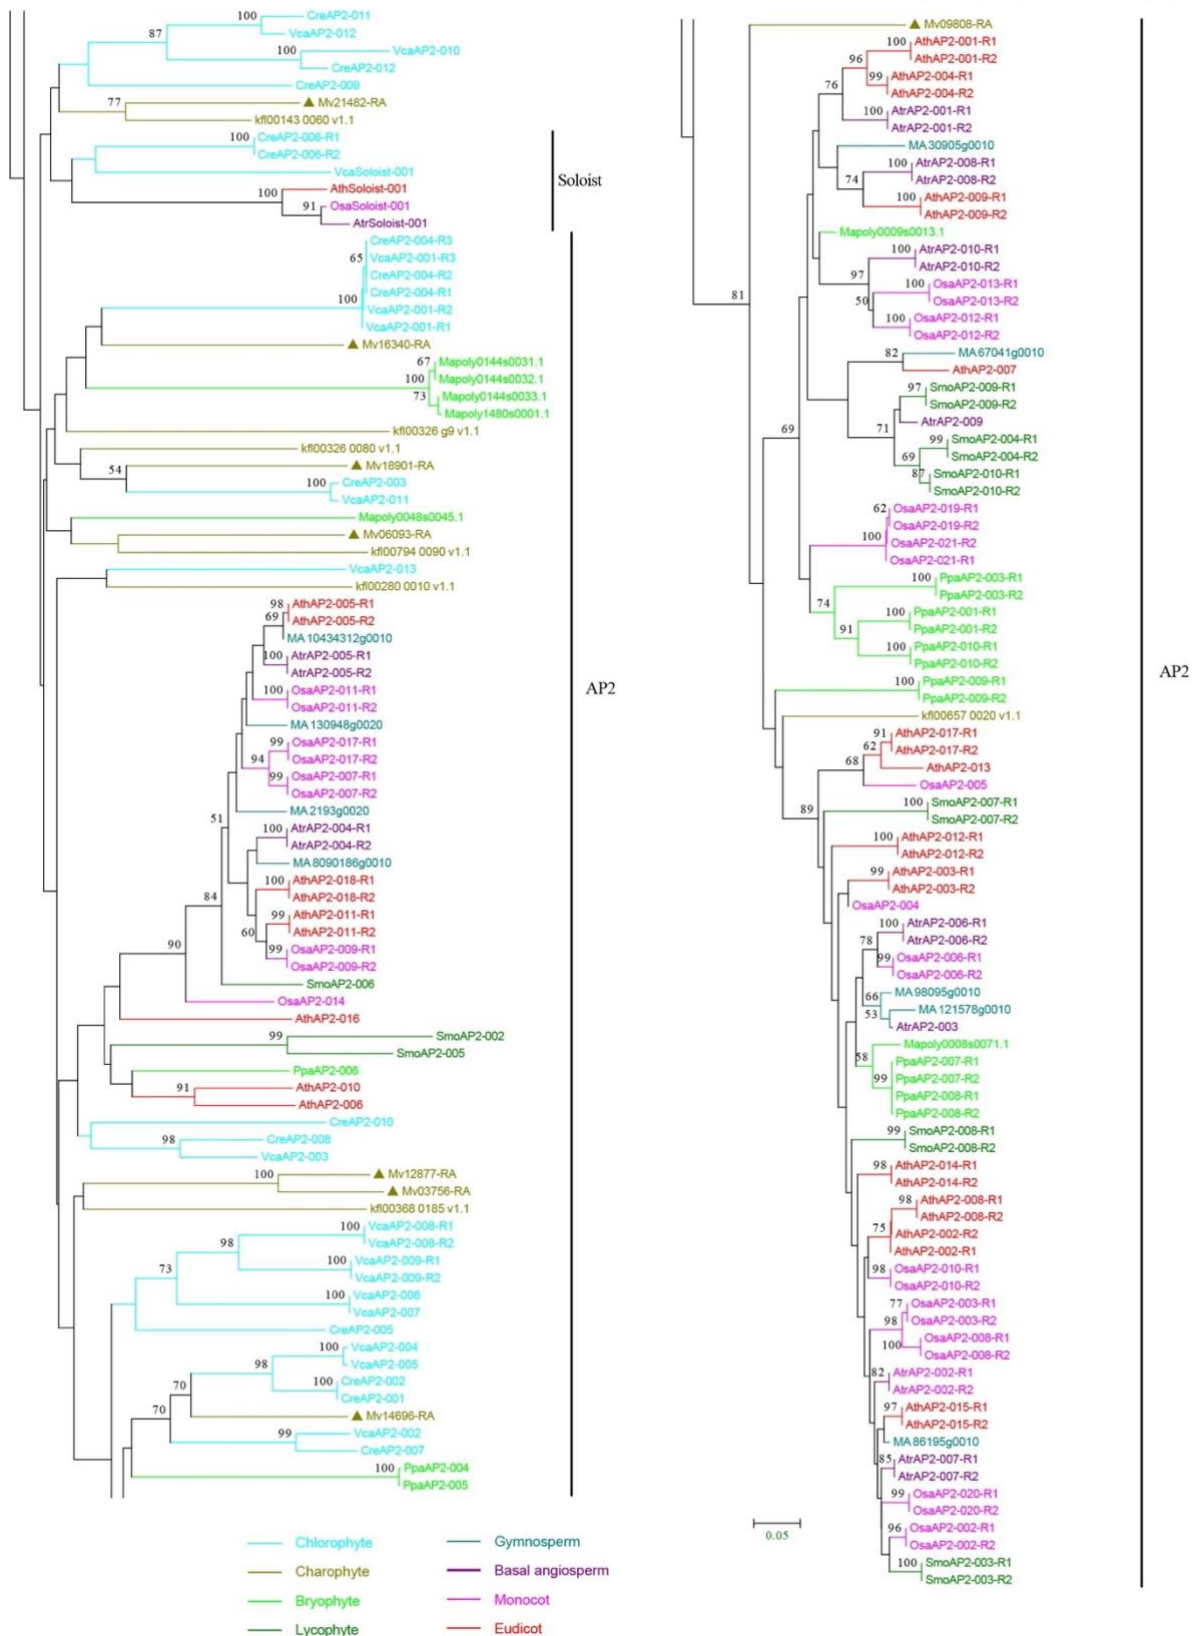

**Data S1G.** Phylogenetic relationships of APETALA 2/ERE binding factor (AP2/ERF) TFs from *M. viride* and 10 evolutionarily representative species. The *M. viride* sequences were highlighted by triangles. Numbers on the major branches indicate bootstrap values (> 50%) in 1,000 replicates. The classification/clade was named based on previous studies.[3-6]

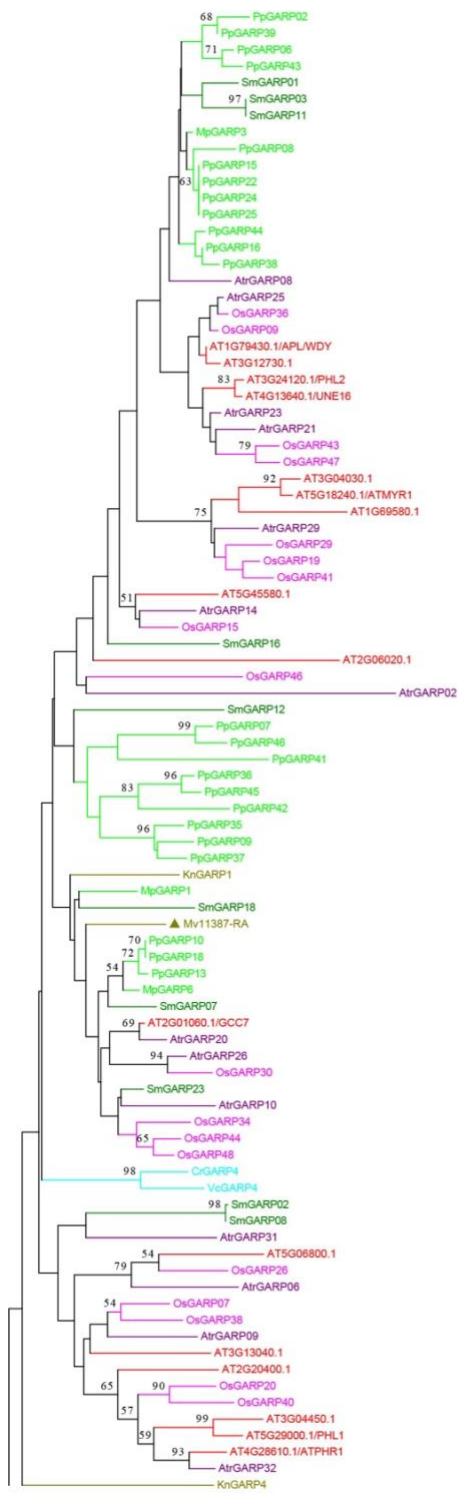

S1/KAN/PHR/PHL

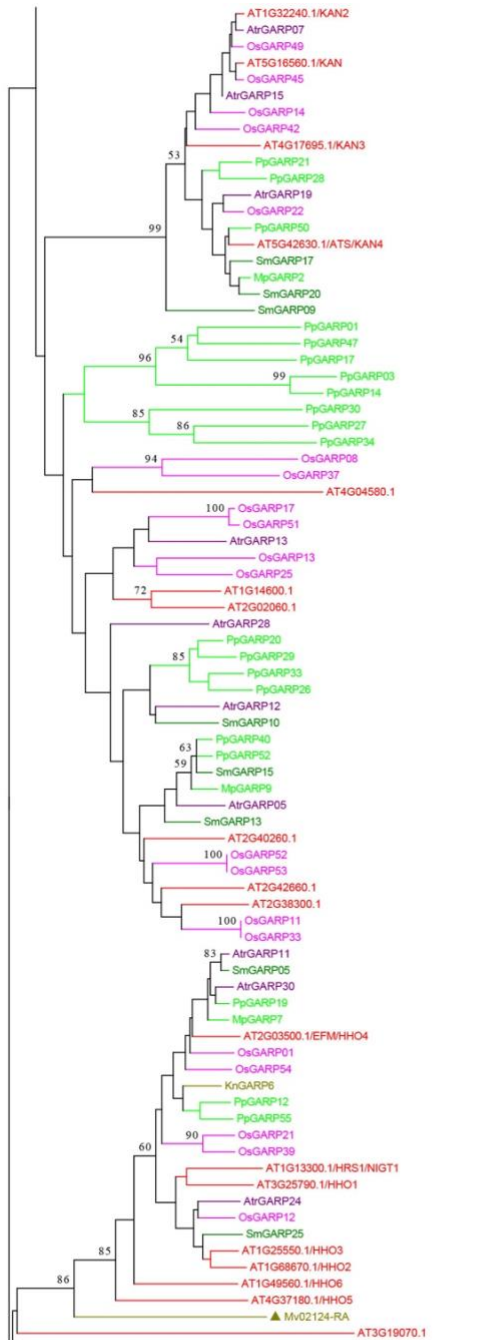

S1/KAN/PHR/PHL

S2/HHOs

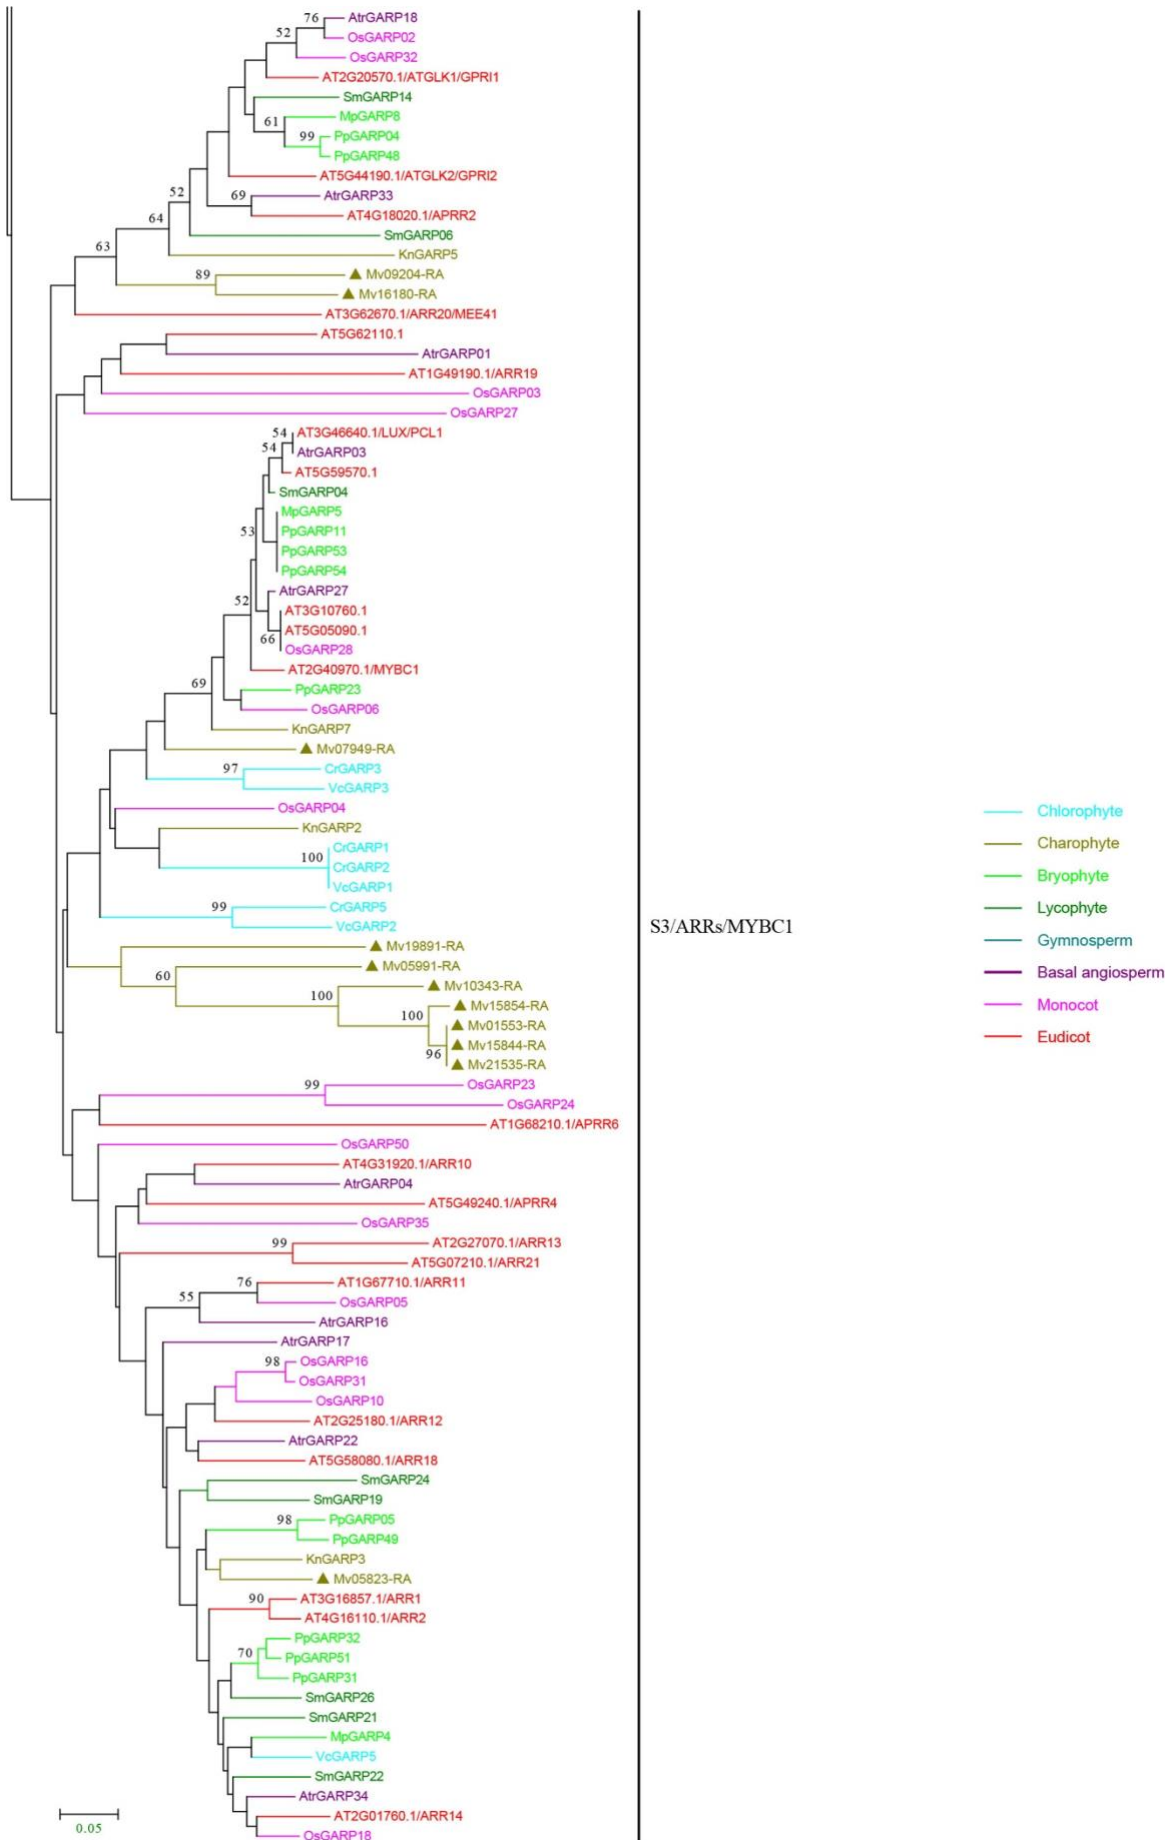

**Data S1H.** Phylogenetic relationships of GARP TFs from *M. viride* and 10 evolutionarily representative species. The *M. viride* sequences were highlighted by triangles. Numbers on the major branches indicate bootstrap values (> 50%) in 1,000 replicates. The classification/clade was named based on a previous study.<sup>[7]</sup>

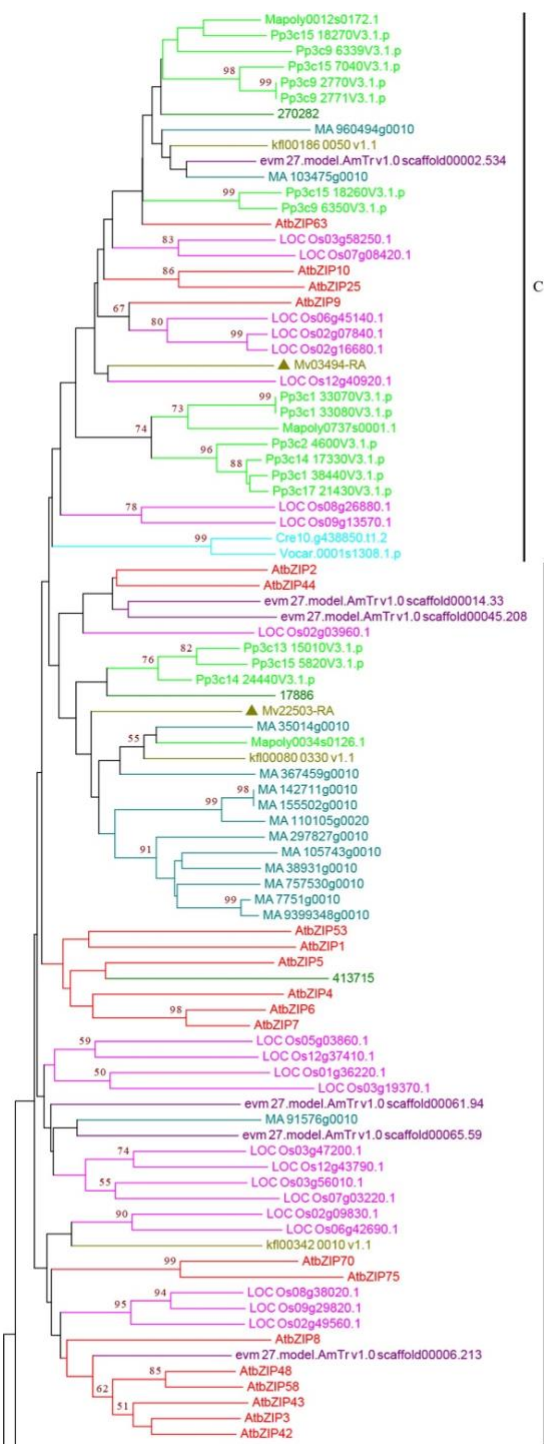

C

S

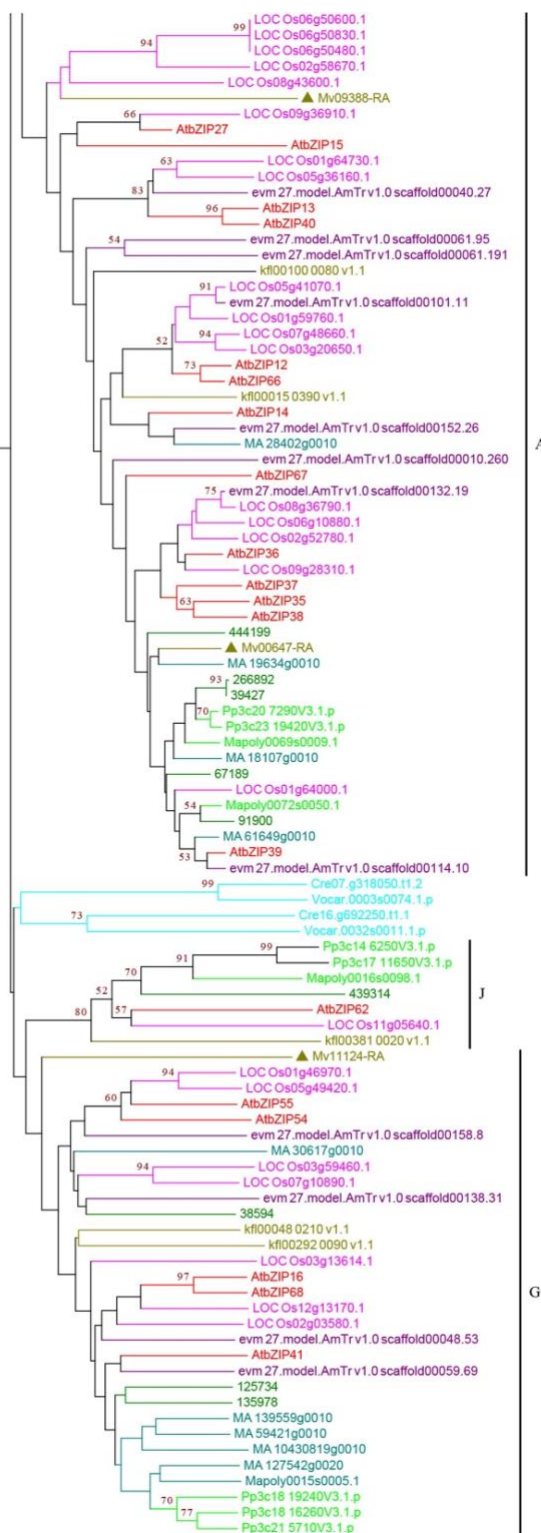

A

J

G



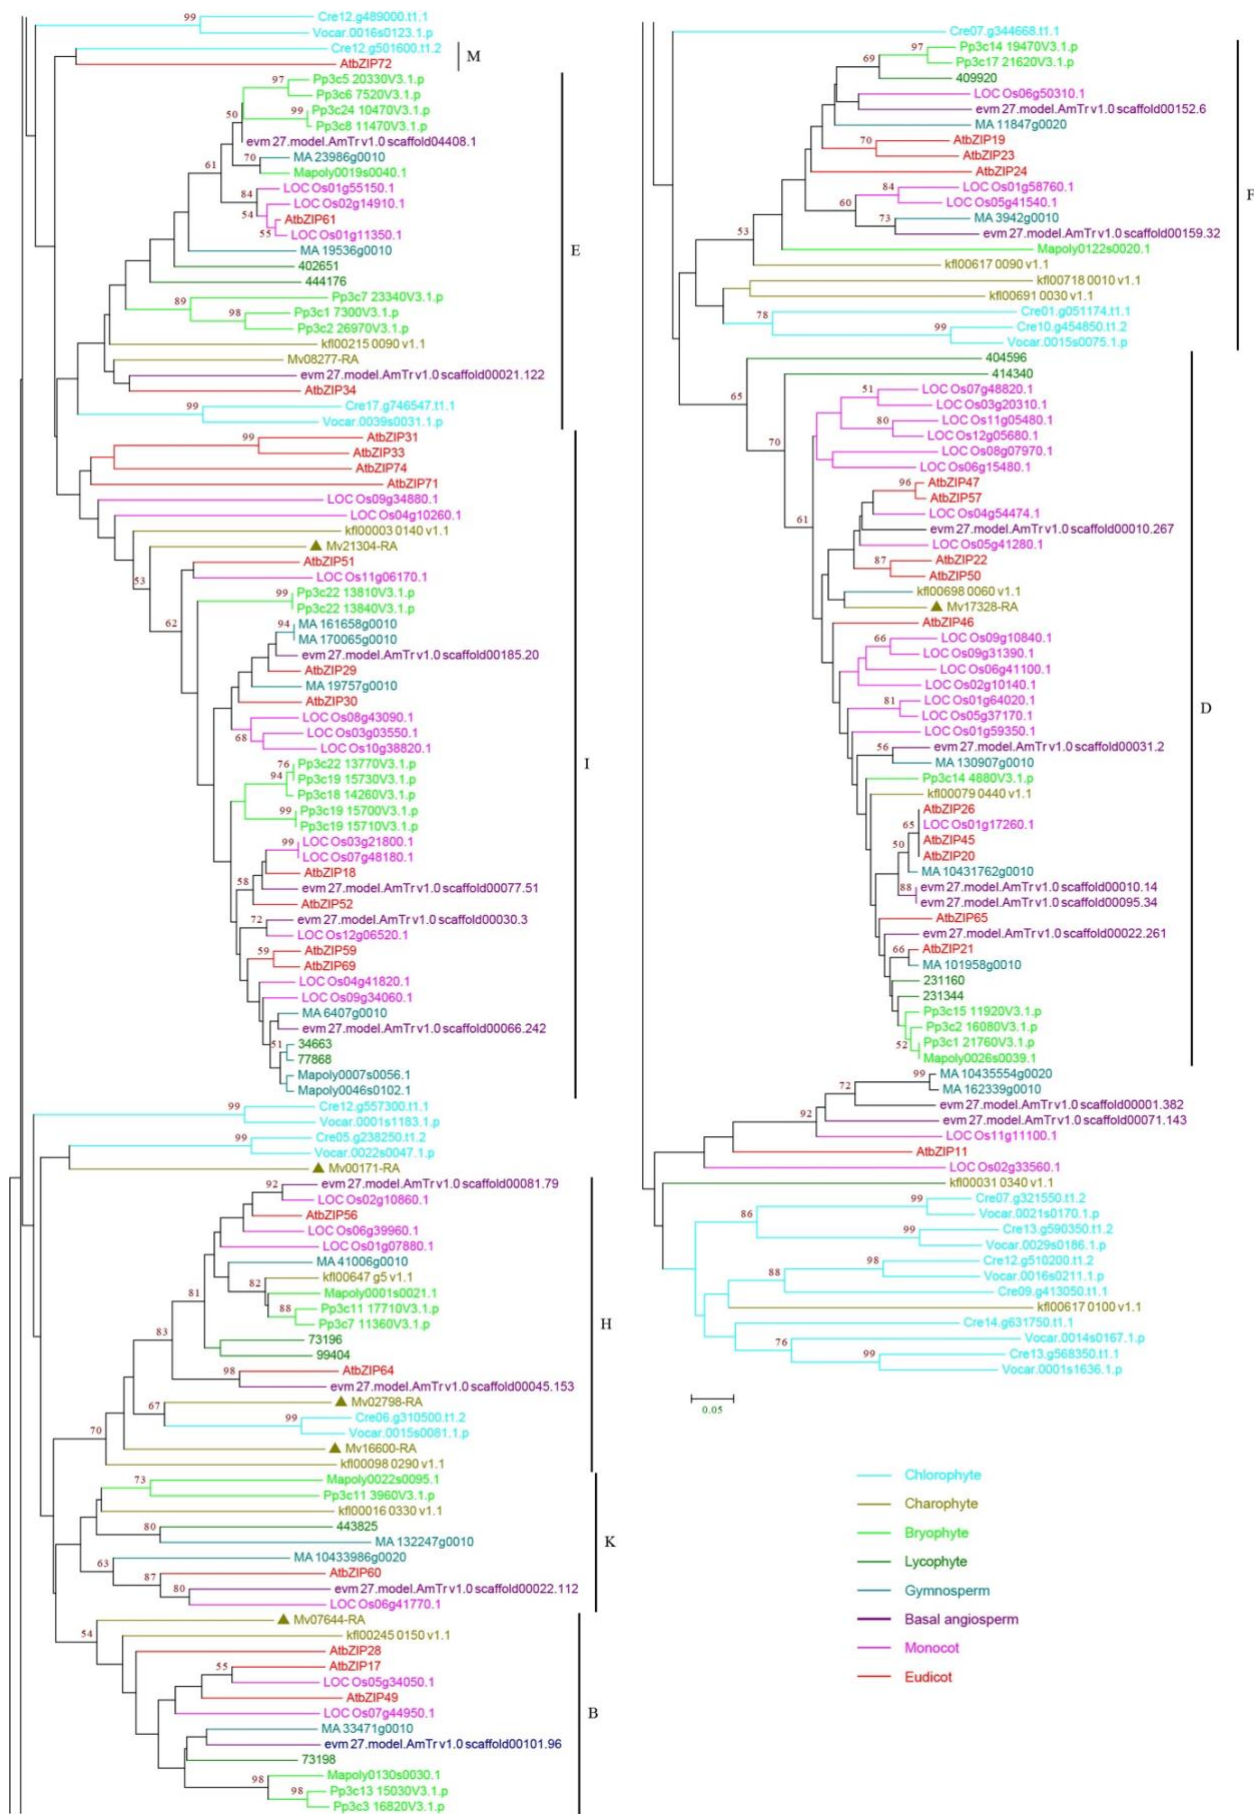

**Data S1I.** Phylogenetic relationships of Basic Leucine Zipper (bZIP) TFs from *M. viride* and 10 evolutionarily representative species. The *M. viride* sequences were highlighted by triangles. Numbers on the major branches indicate bootstrap values (> 50%) in 1,000 replicates. The classification/clade was named based on previous studies.<sup>[8-9]</sup>



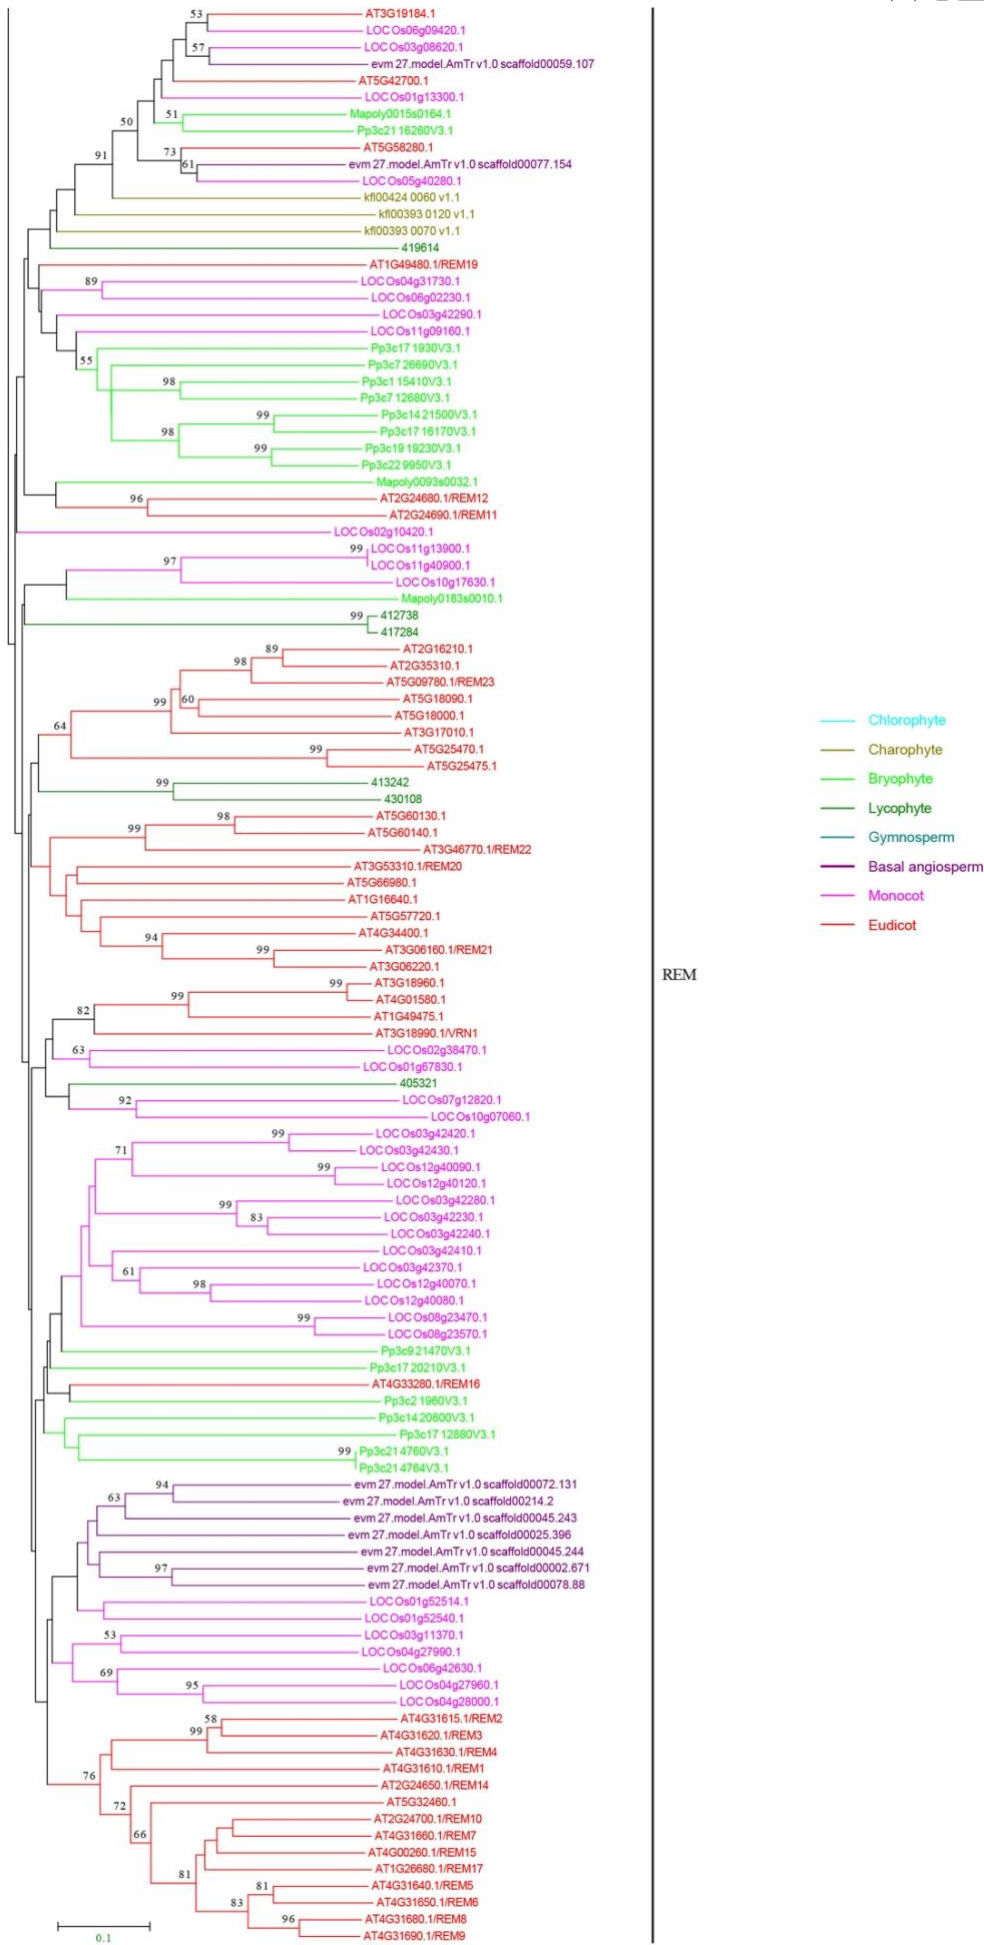

**Data S1J.** Phylogenetic relationships of B3 TFs from *M. viride* and 10 evolutionarily representative species. The *M. viride* sequences were highlighted by triangles. Numbers on the major branches indicate bootstrap values (> 50%) in 1,000 replicates. The classification/clade was named based on previous studies.<sup>[10-12]</sup>

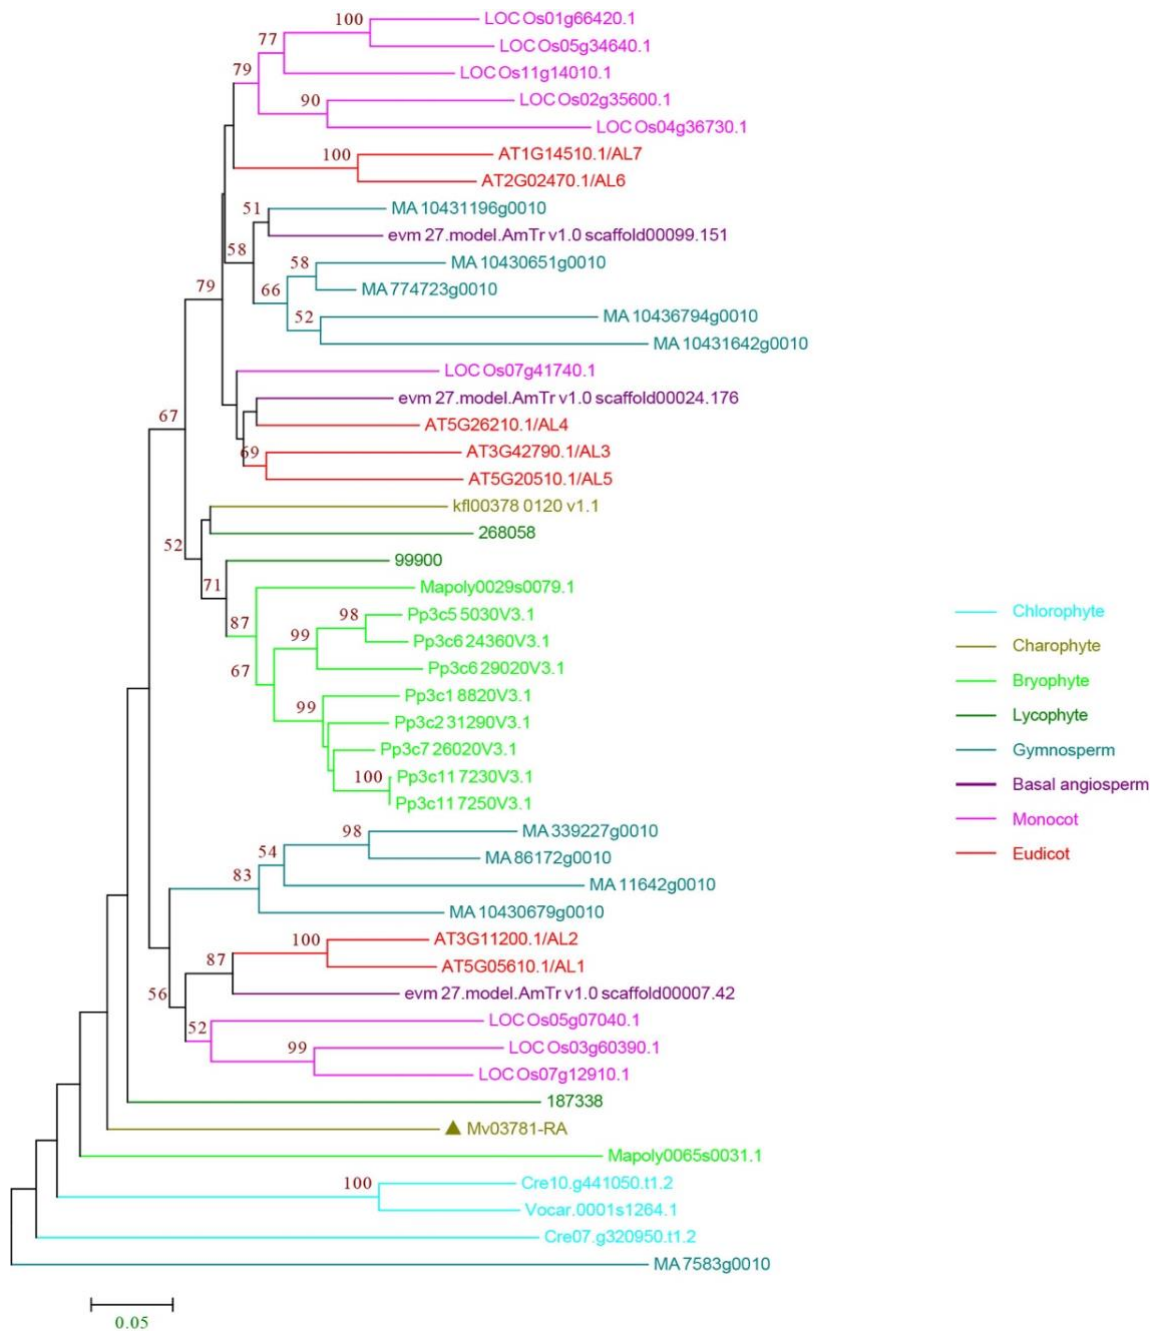

**Data S1K.** Phylogenetic relationships of alfin1-like TFs from *M. viride* and 10 evolutionarily representative species. The *M. viride* sequence was highlighted by a triangle. Numbers on the major branches indicate bootstrap values (> 50%) in 1,000 replicates.

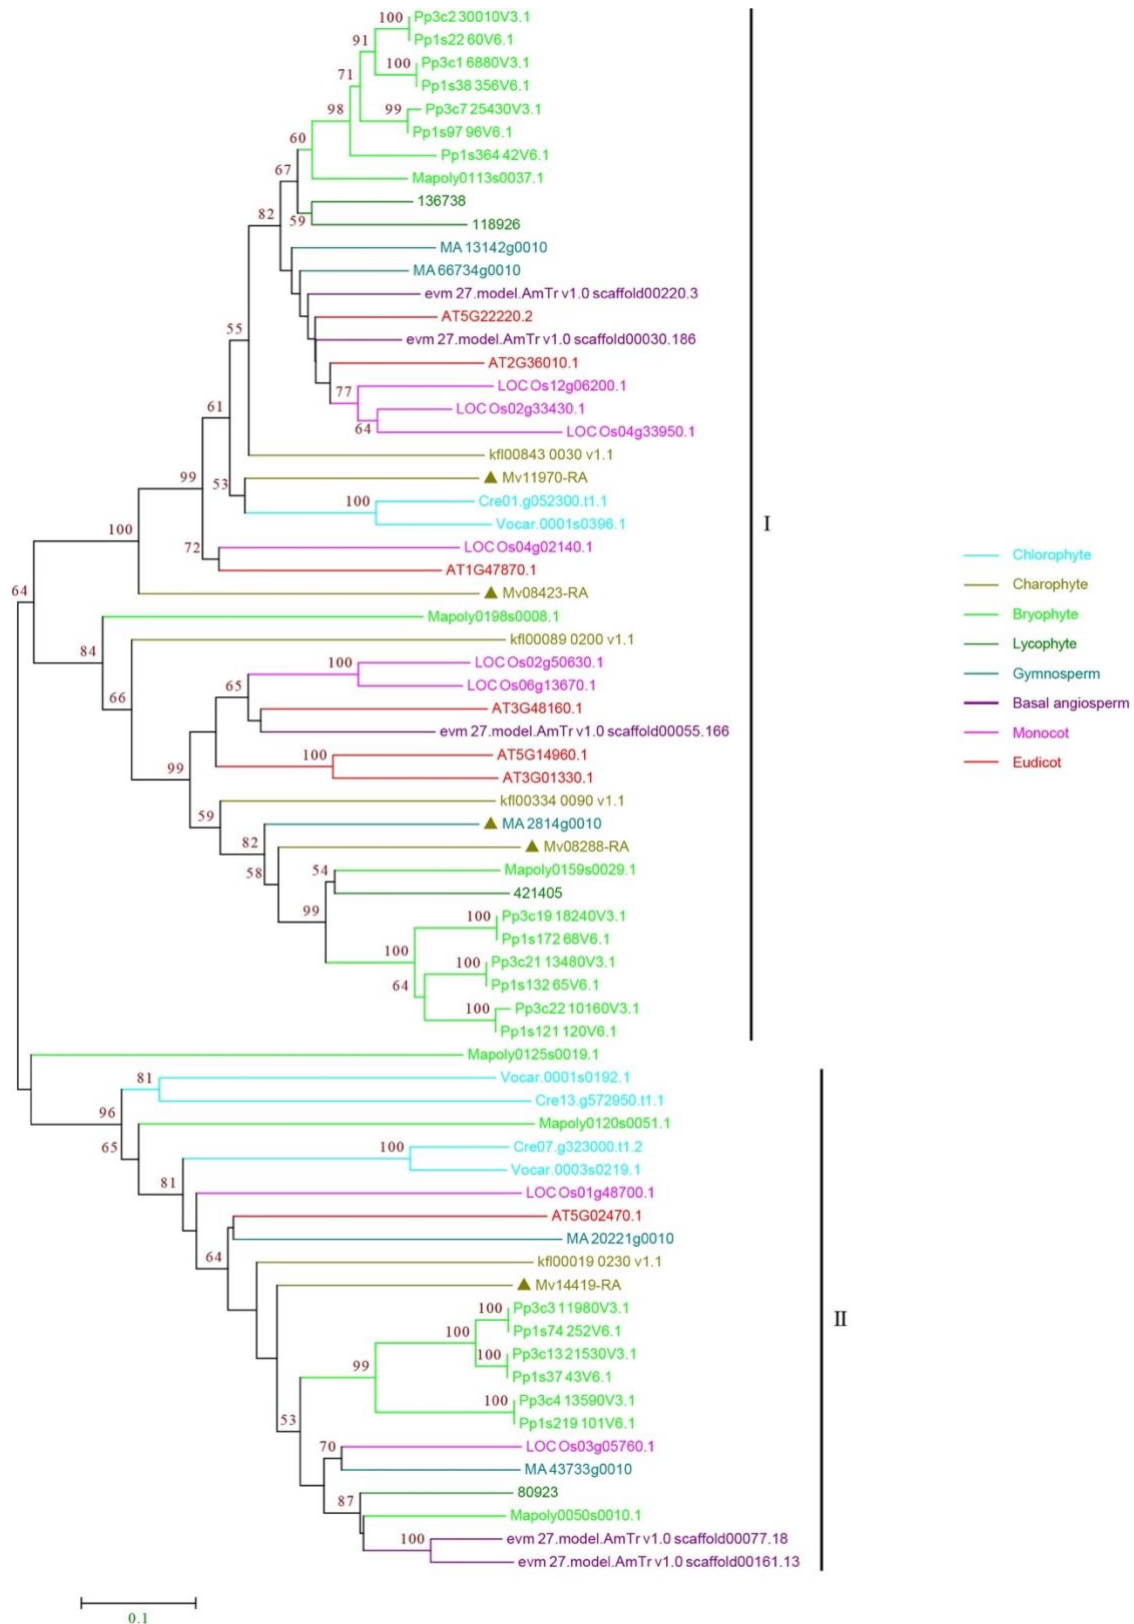

**Data S1L.** Phylogenetic relationships of E2 factor (E2F) TFs from *M. viride* and 10 evolutionarily representative species. The *M. viride* sequences were highlighted by triangles. Numbers on the major branches indicate bootstrap values (> 50%) in 1,000 replicates. The classification/clade was named based on previous studies.[13-14]

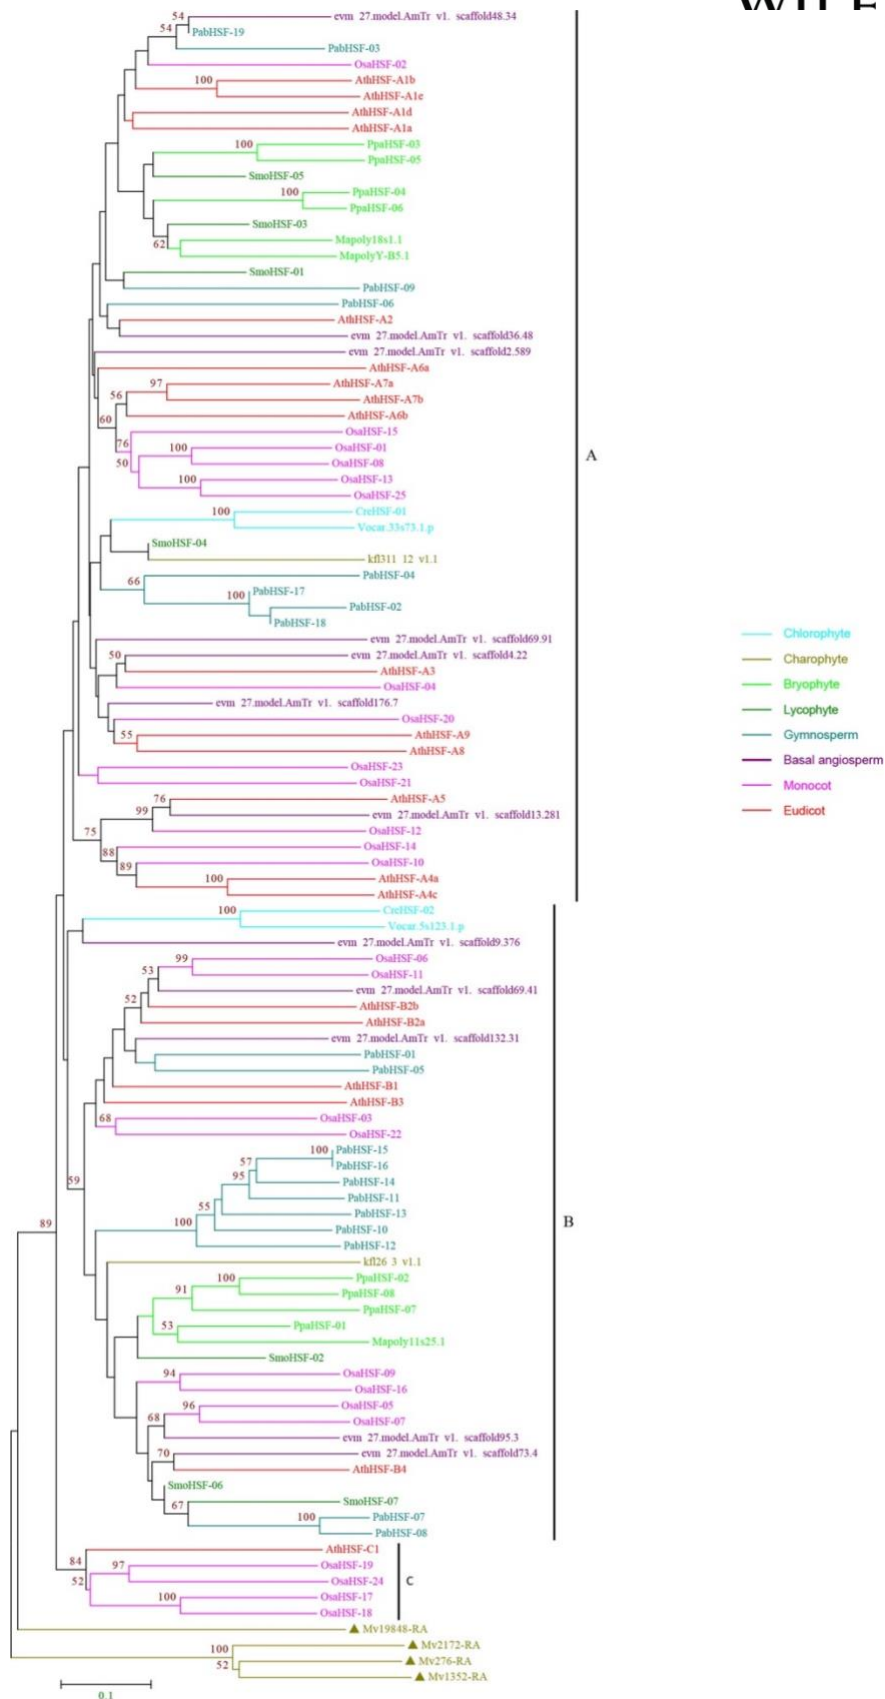

**Data S1M.** Phylogenetic relationships of heat shock transcription factor (HSF) TFs from *M. viride* and 10 evolutionarily representative species. The *M. viride* sequences were highlighted by triangles. Numbers on the major branches indicate bootstrap values (> 50%) in 1,000 replicates. The classification/clade was named based on a previous study.[15]



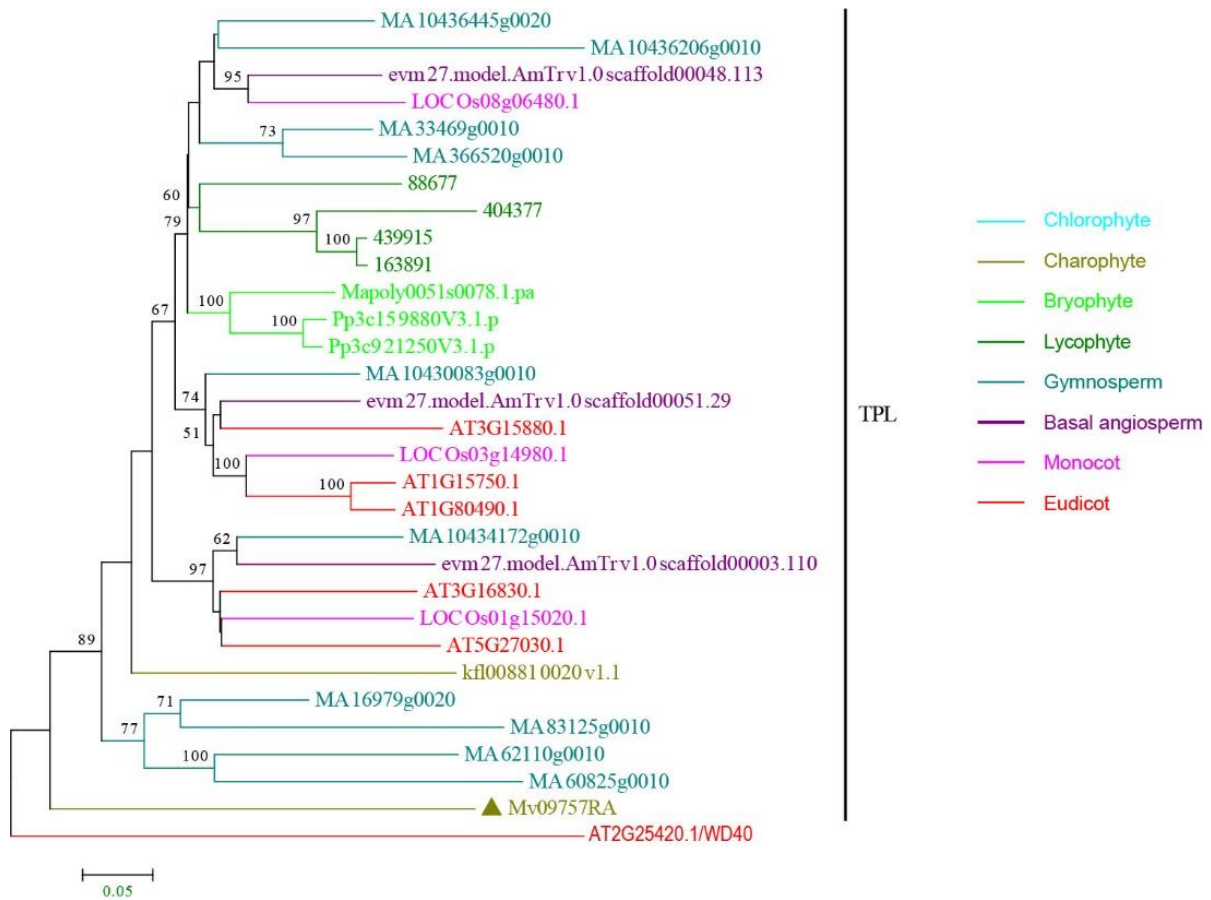

**Data S1N.** Phylogenetic relationships of TOPLESS (TPL) proteins from *M. viride* and other evolutionarily representative species. The *M. viride* sequence was highlighted by a triangle. Numbers on the major branches indicate bootstrap values (> 50%) in 1,000 replicates.

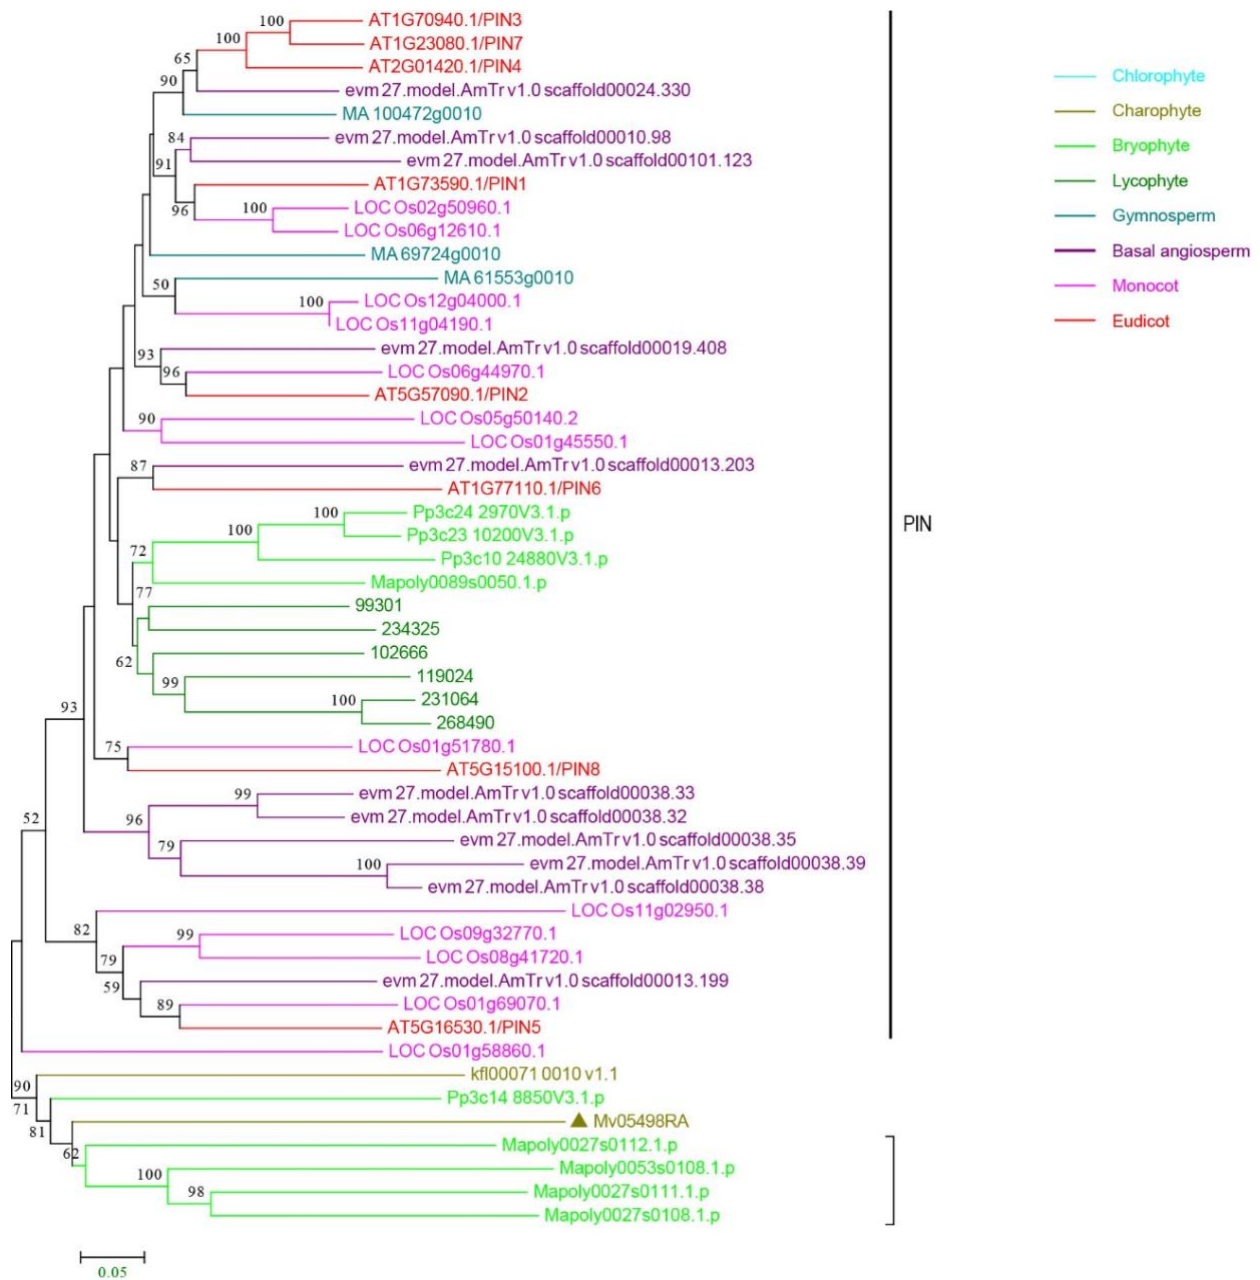

**Data S10.** Phylogenetic relationships of PIN-FORMED (PIN) proteins from *M. viride* and other evolutionarily representative species. The *M. viride* sequence was highlighted by a triangle. Numbers on the major branches indicate bootstrap values (> 50%) in 1,000 replicates.

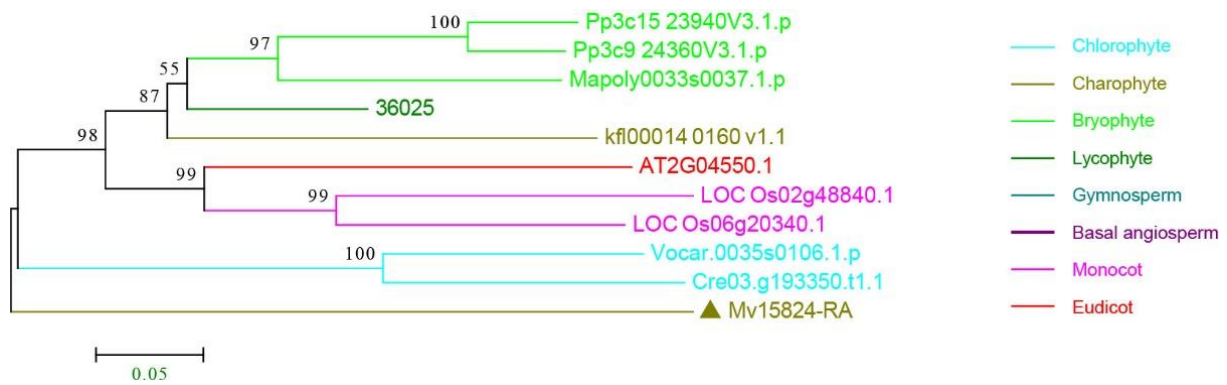

**Data S1P.** Phylogenetic relationships of INDOLE-3-BUTYRIC ACID RESPONSE (IBR) proteins from *M. viride* and other evolutionarily representative species. The *M. viride* sequence was highlighted by a triangle. Numbers on the major branches indicate bootstrap values (> 50%) in 1,000 replicates.

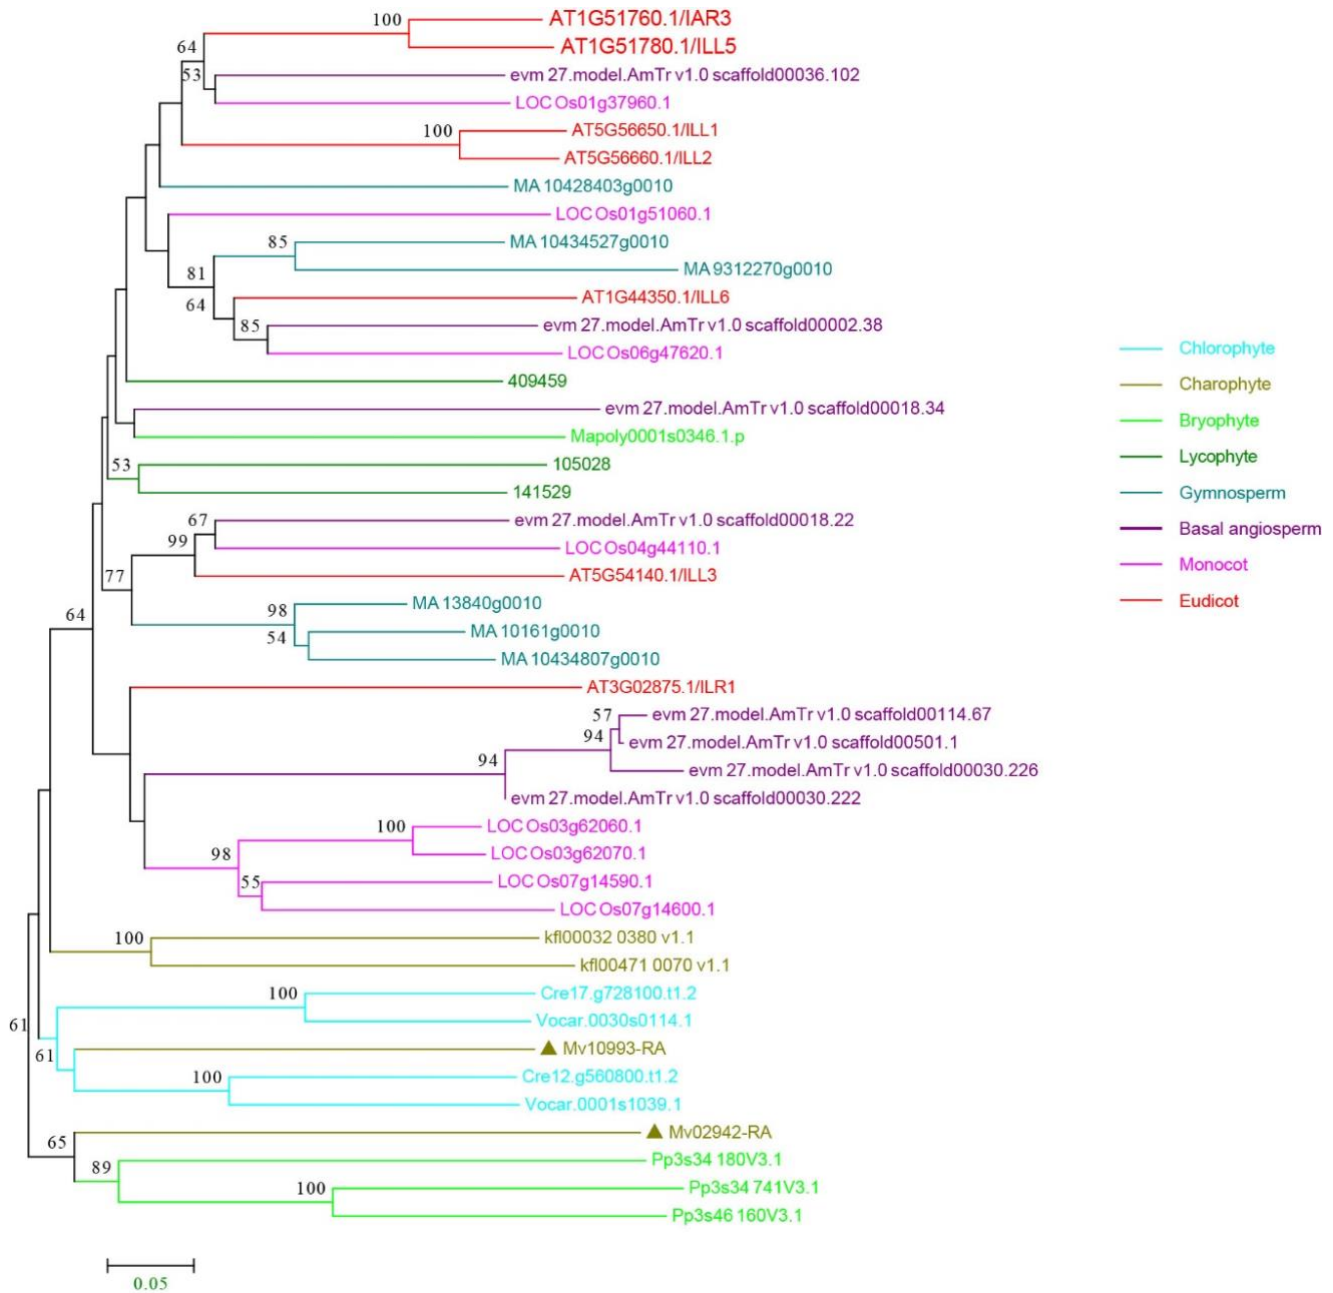

**Data S1Q.** Phylogenetic relationships of IAA-LEUCINE RESISTANT (ILR) proteins from *M. viride* and other evolutionarily representative species. The *M. viride* sequences were highlighted by triangles. Numbers on the major branches indicate bootstrap values (> 50%) in 1,000 replicates.

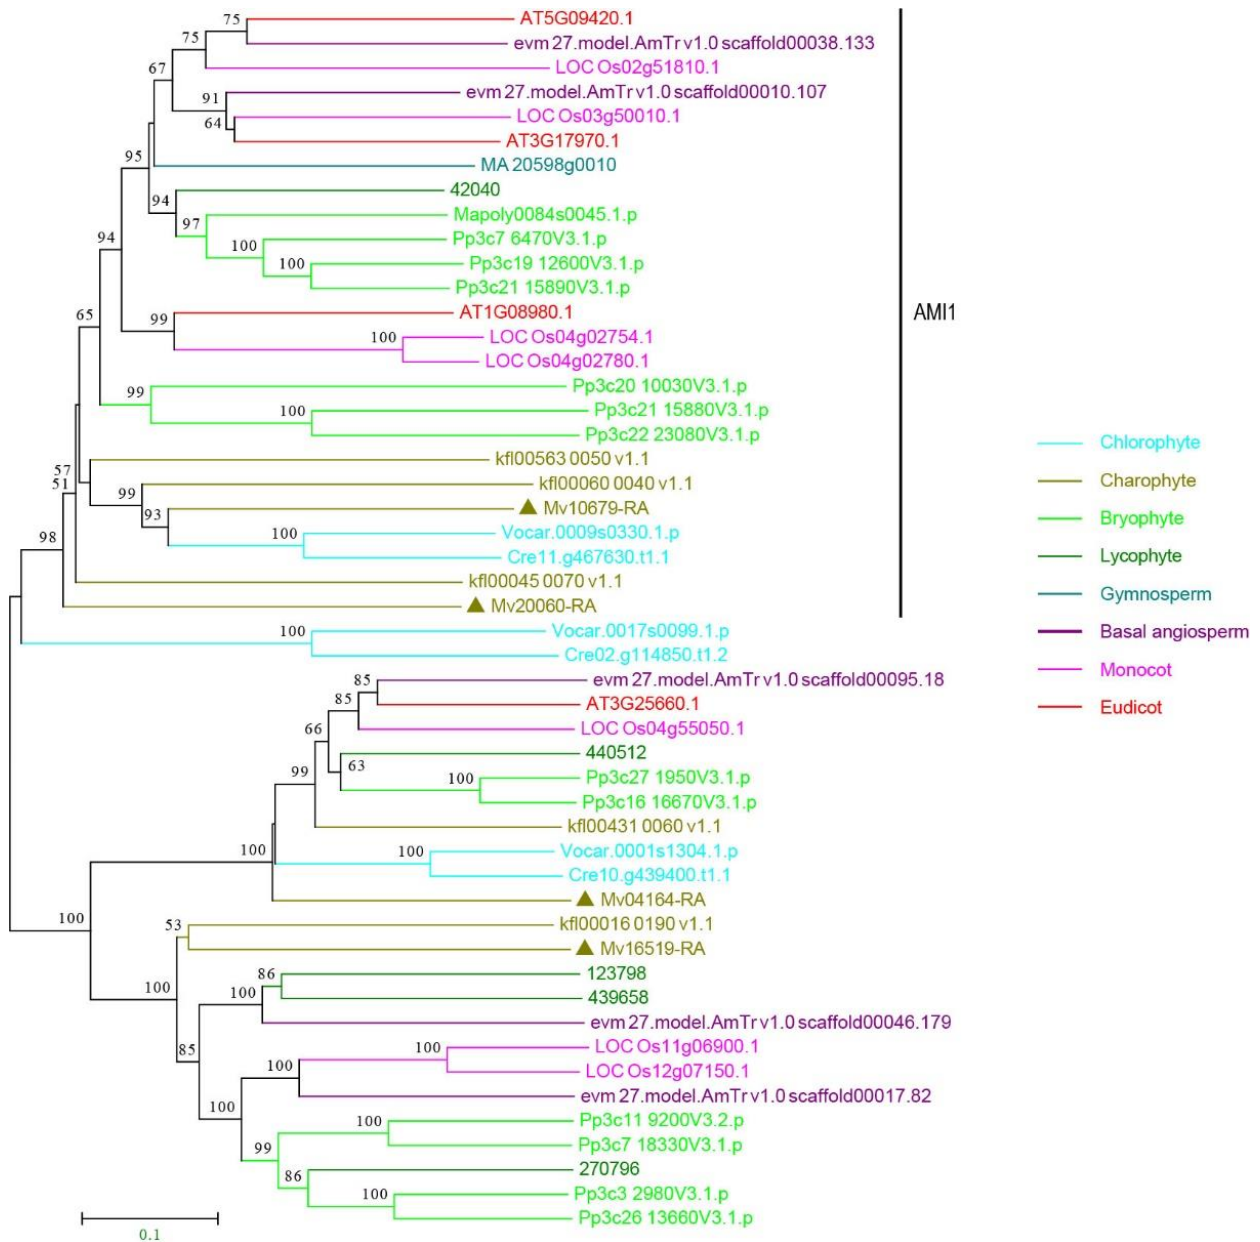

**Data S1R.** Phylogenetic relationships of AMIDASEA1 (AMI1) proteins from *M. viride* and other evolutionarily representative species. The *M. viride* sequences were highlighted by triangles. Numbers on the major branches indicate bootstrap values (> 50%) in 1,000 replicates.

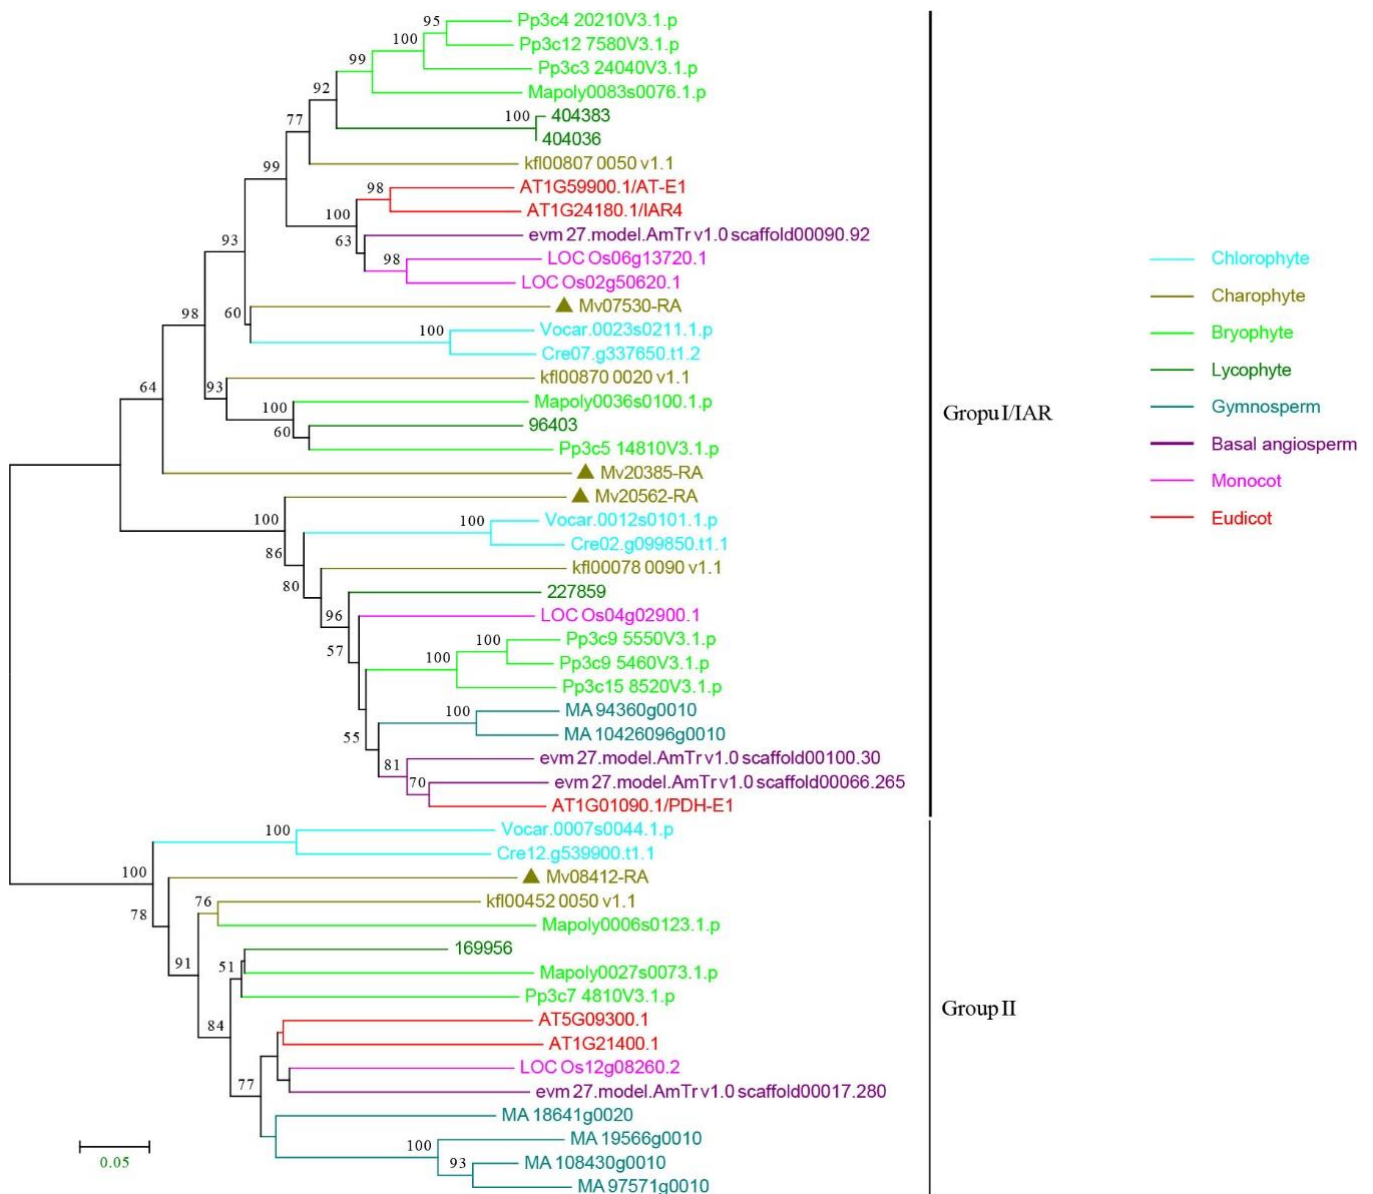

**Data S1S.** Phylogenetic relationships of IAA-CONJUGATE-RESISTANT (IAR) proteins from *M. viride* and other evolutionarily representative species. The *M. viride* sequences were highlighted by triangles. Numbers on the major branches indicate bootstrap values (> 50%) in 1,000 replicates.

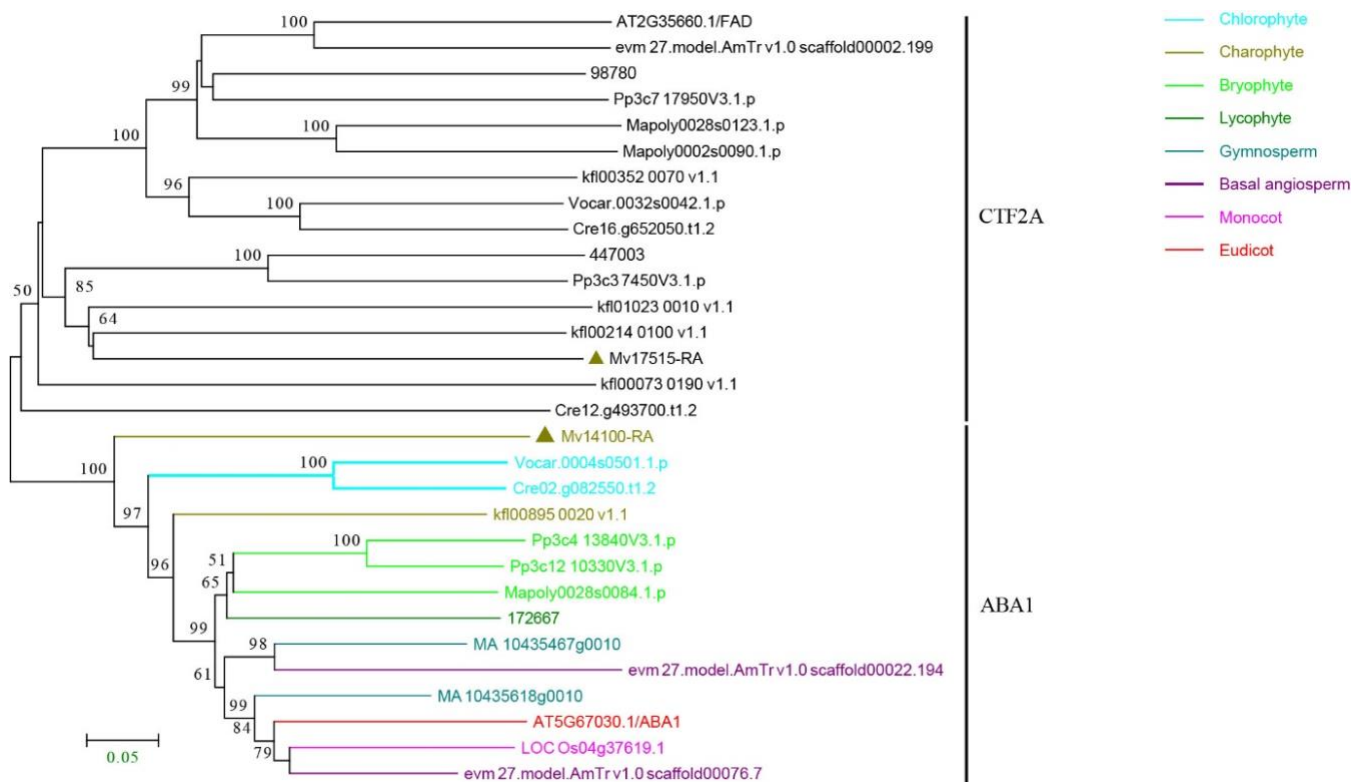

**Data S1T.** Phylogenetic relationships of ABA DEFICIENT 1 (ABA1) proteins from *M. viride* and other evolutionarily representative species. *M. viride* sequences were highlighted by triangles. Numbers on the major branches indicate bootstrap values (> 50%) in 1,000 replicates.





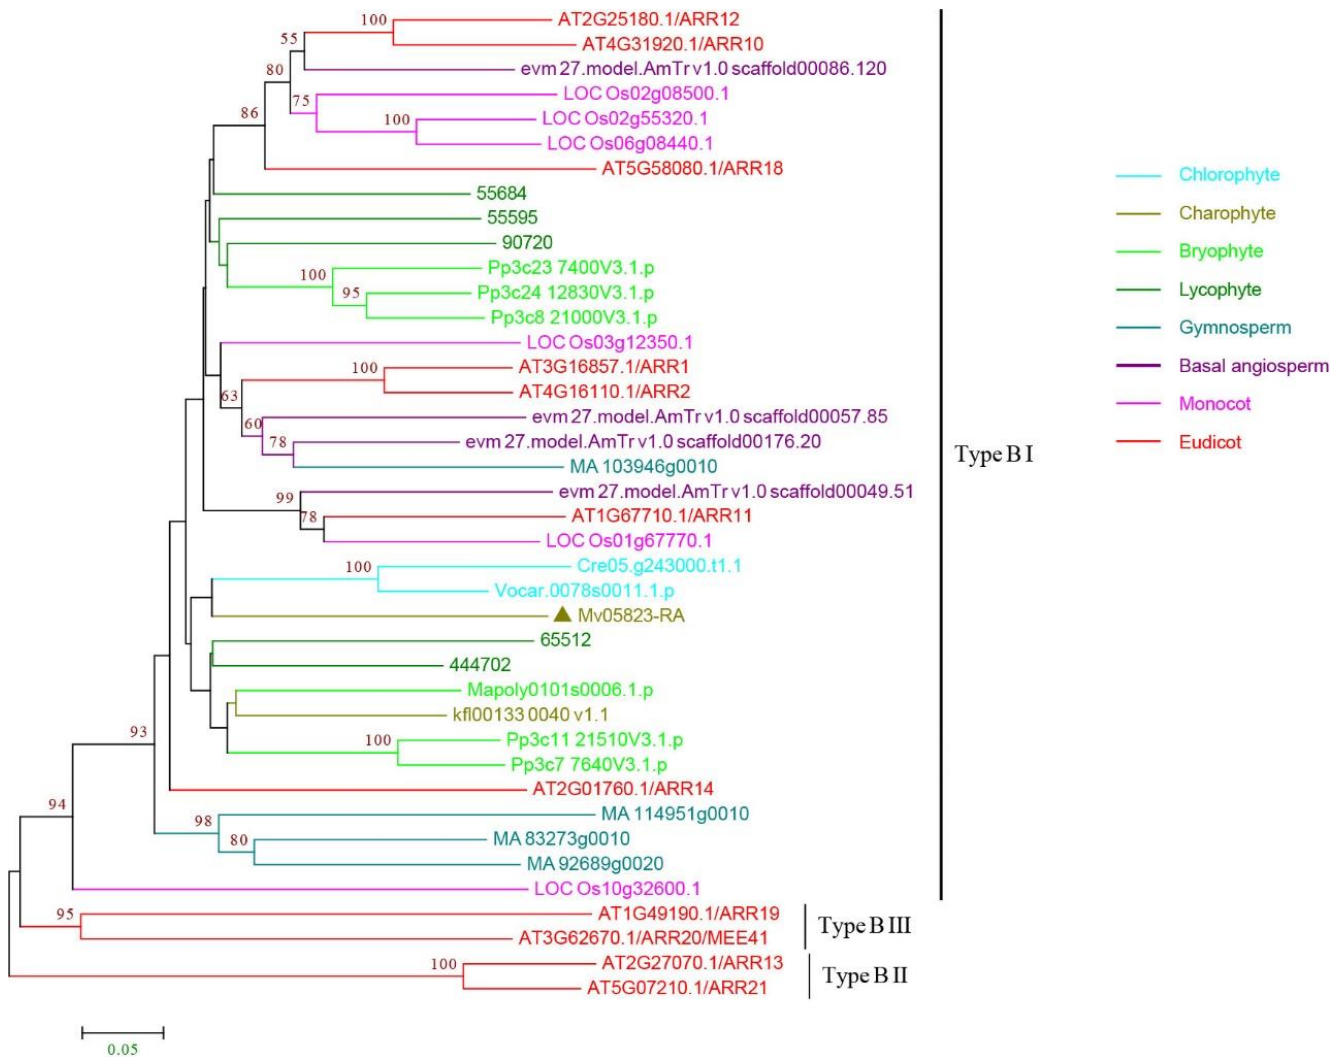

**Data S1V.** Phylogenetic relationships of Type B RESPONSE REGULATOR (ARR) proteins from *M. viride* and other evolutionarily representative species. The *M. viride* sequence was highlighted by a triangle. Numbers on the major branches indicate bootstrap values (> 50%) in 1,000 replicates.

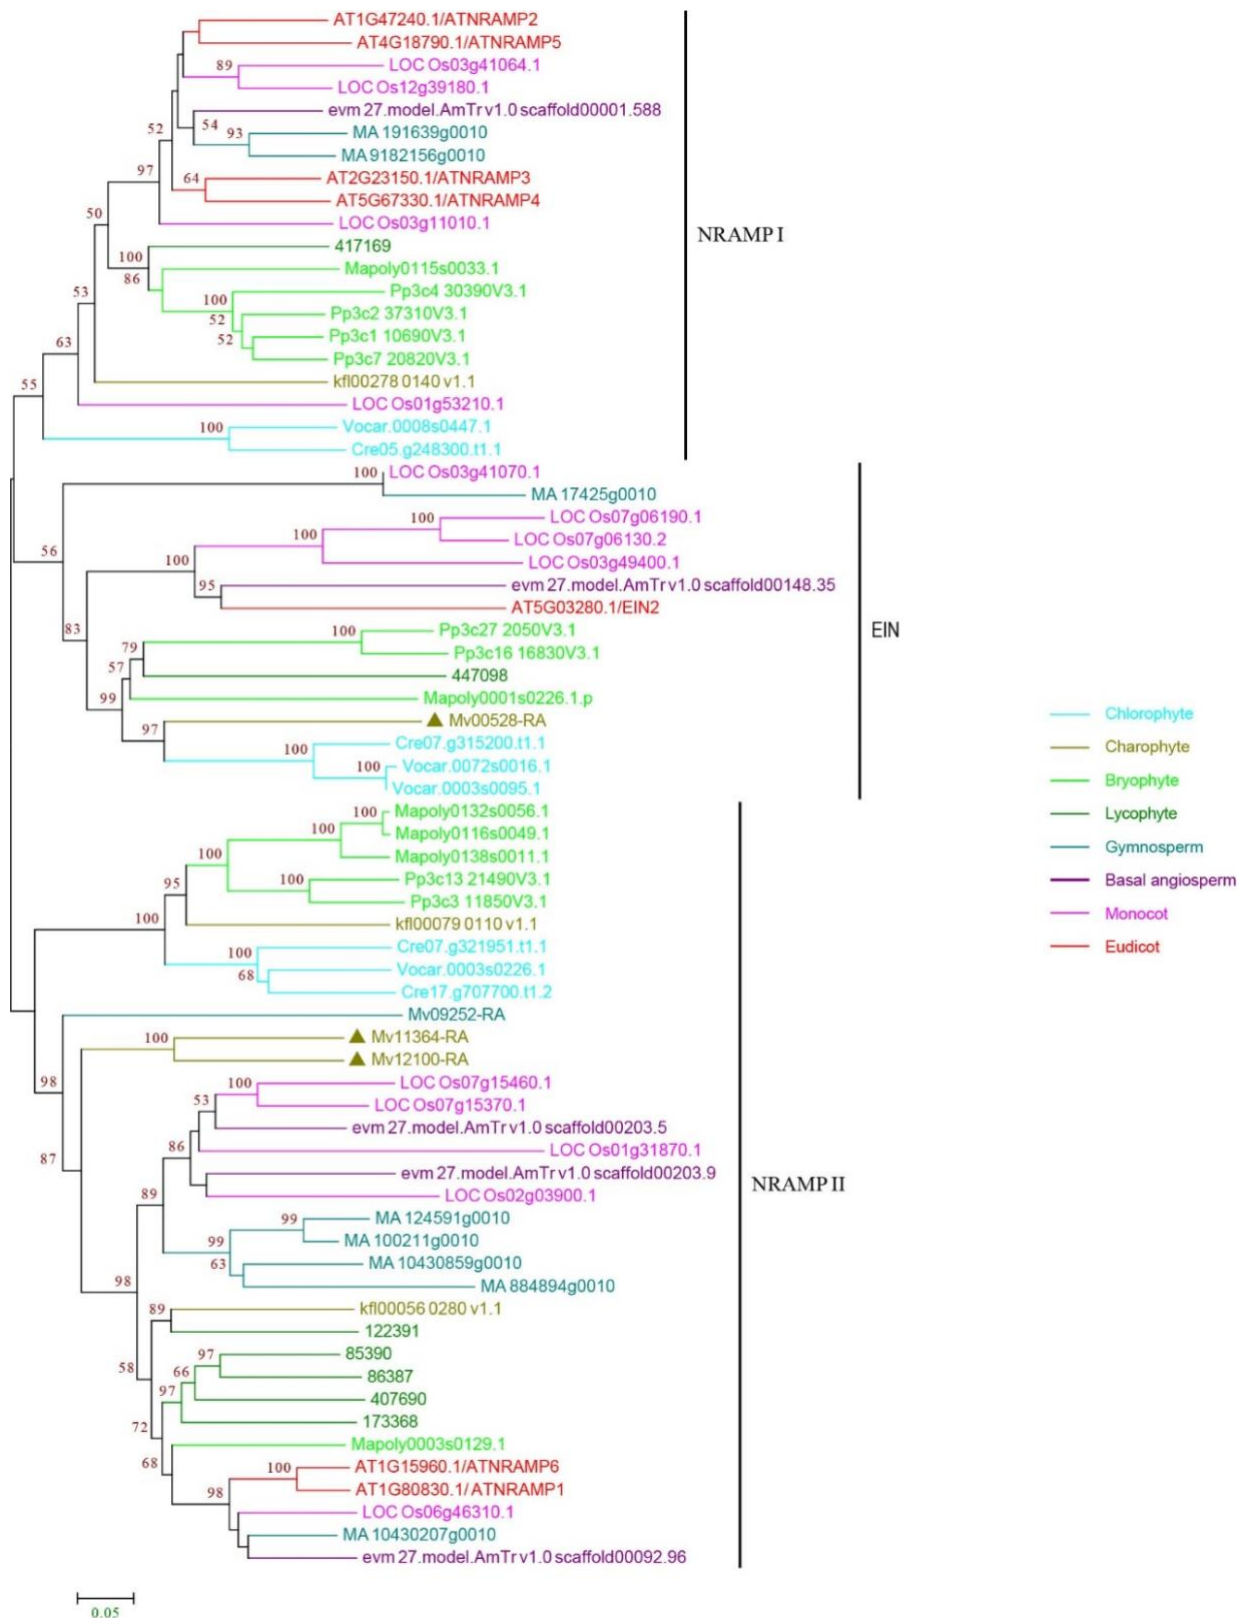

**Data S1W.** Phylogenetic relationships of ETHYLENE INSENSITIVE2 (EIN2) proteins from *M. viride* and other evolutionarily representative species. The *M. viride* sequences were highlighted by triangles. Numbers on the major branches indicate bootstrap values (> 50%) in 1,000 replicates.

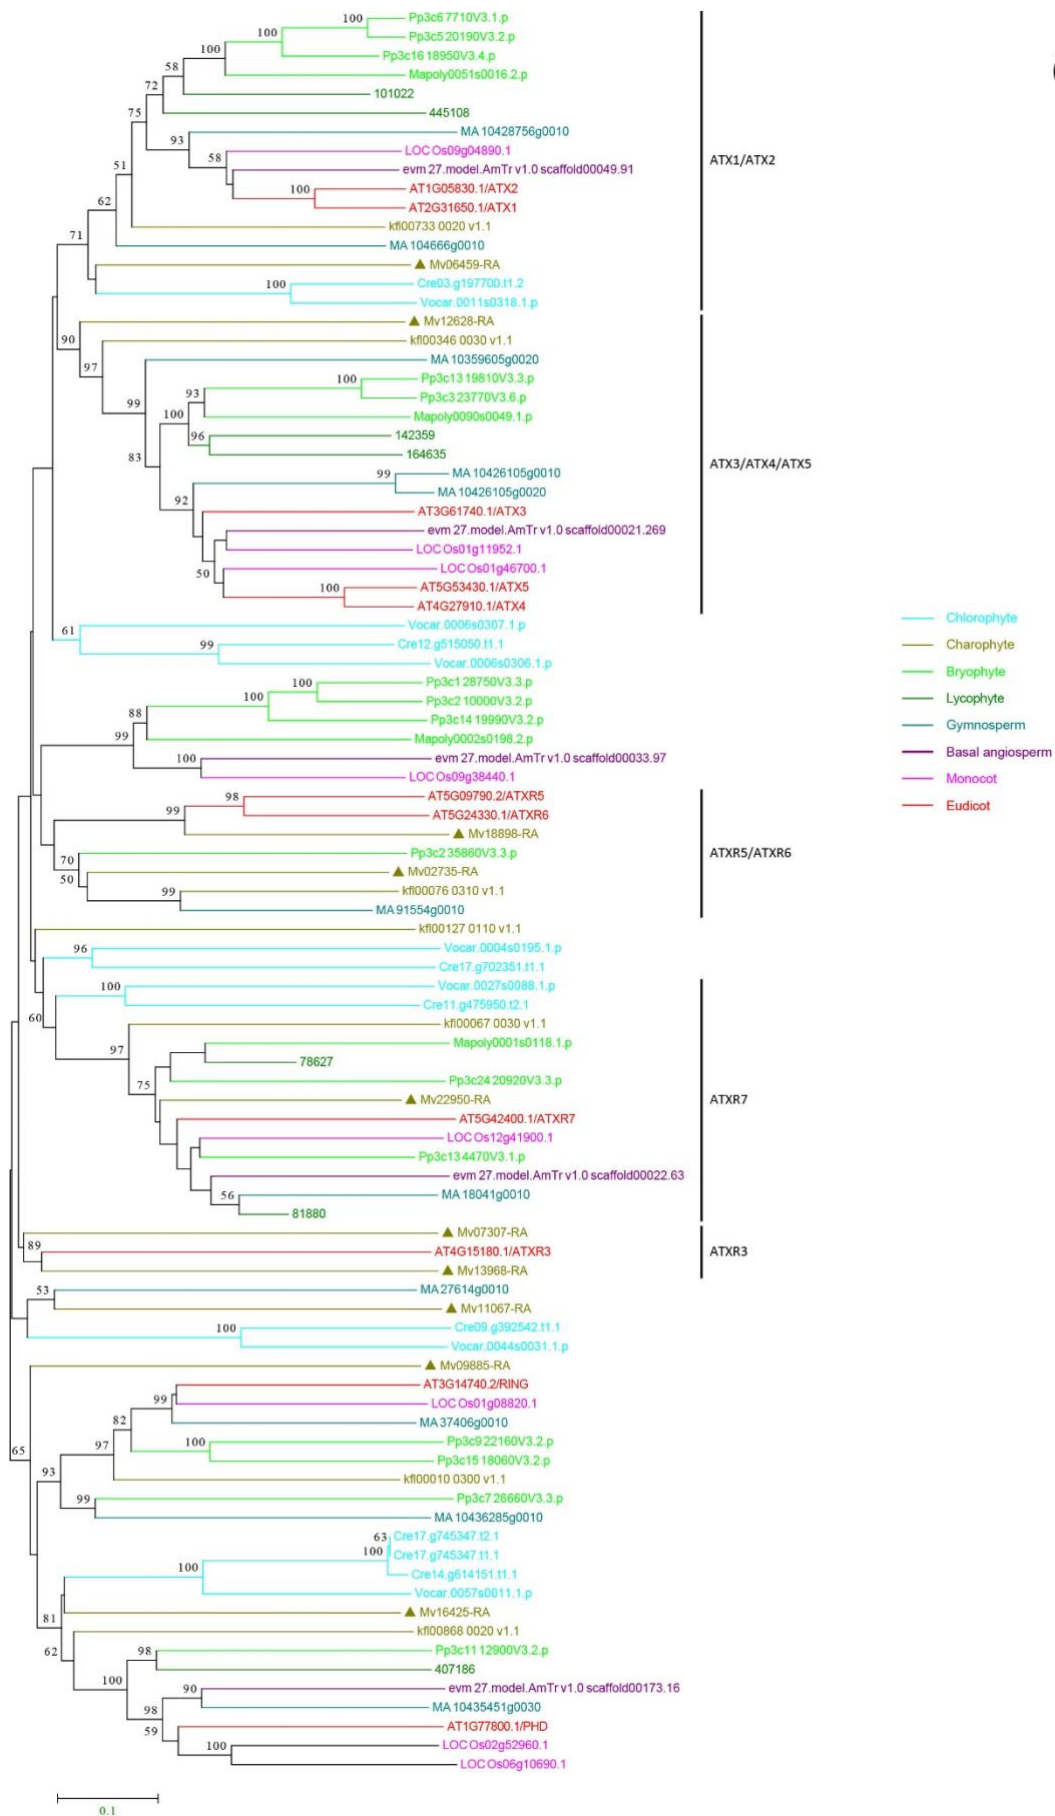

**Data S1X.** Phylogenetic relationships of TRITHORAX-LIKE PROTEIN (ATX) proteins from *M. viride* and other evolutionarily representative species. The *M. viride* sequences were highlighted by triangles. Numbers on the major branches indicate bootstrap values (> 50%) in 1,000 replicates.

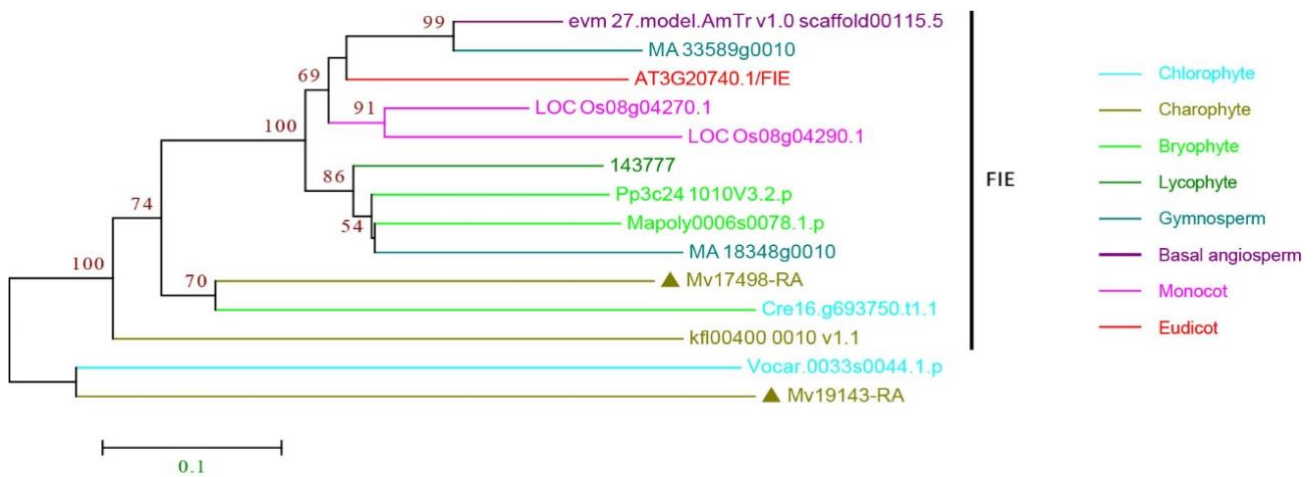

**Data S1Y.** Phylogenetic relationships of FERTILIZATION-INDEPENDENT ENDOSPERM (FIE) proteins from *M. viride* and other evolutionarily representative species. The *M. viride* sequences were highlighted by triangles. Numbers on the major branches indicate bootstrap values (> 50%) in 1,000 replicates.

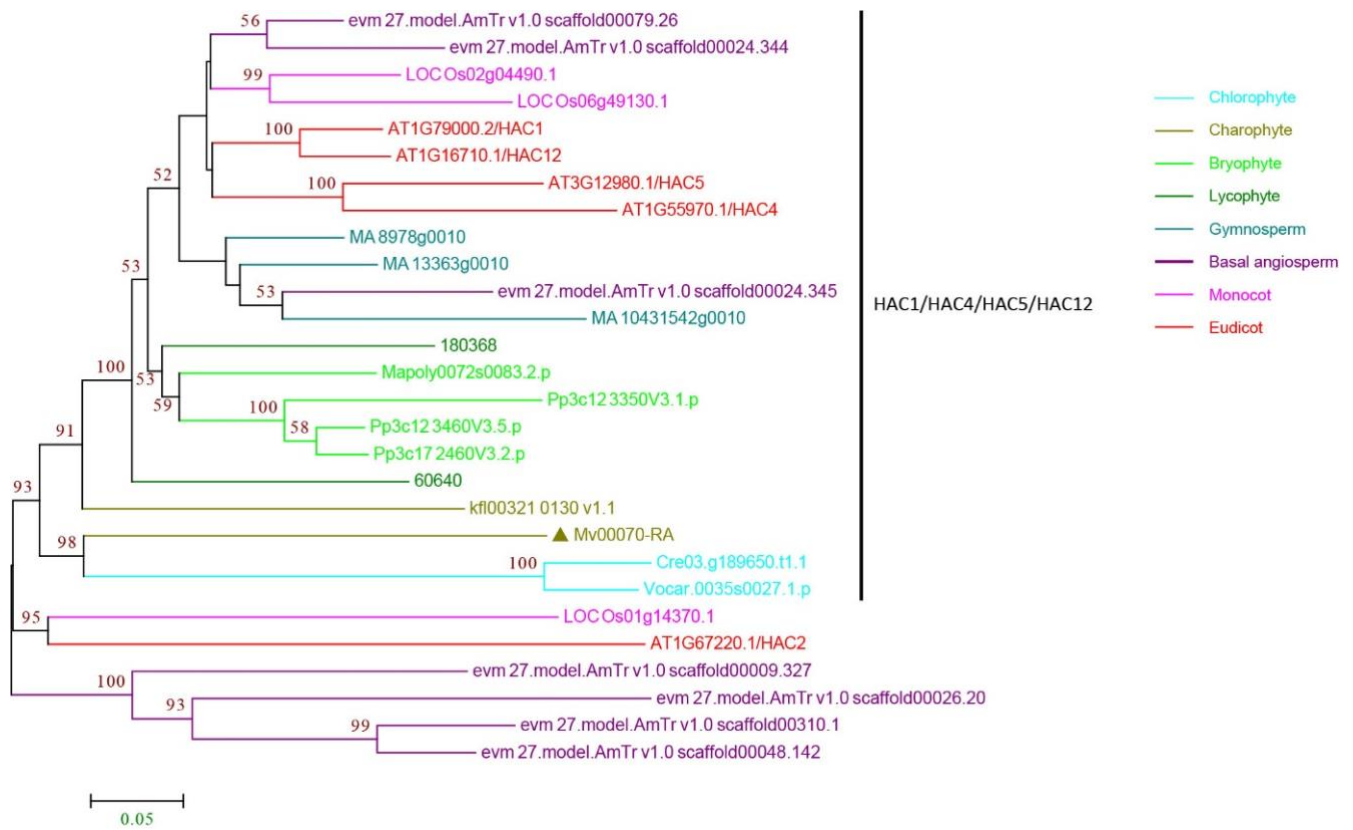

**Data S1Z.** Phylogenetic relationships of HISTONE ACETYLTRANSFERASE OF THE CBP FAMILY (HAC) proteins from *M. viride* and other evolutionarily representative species. The *M. viride* sequence was highlighted by a triangle. Numbers on the major branches indicate bootstrap values (> 50%) in 1,000 replicates.

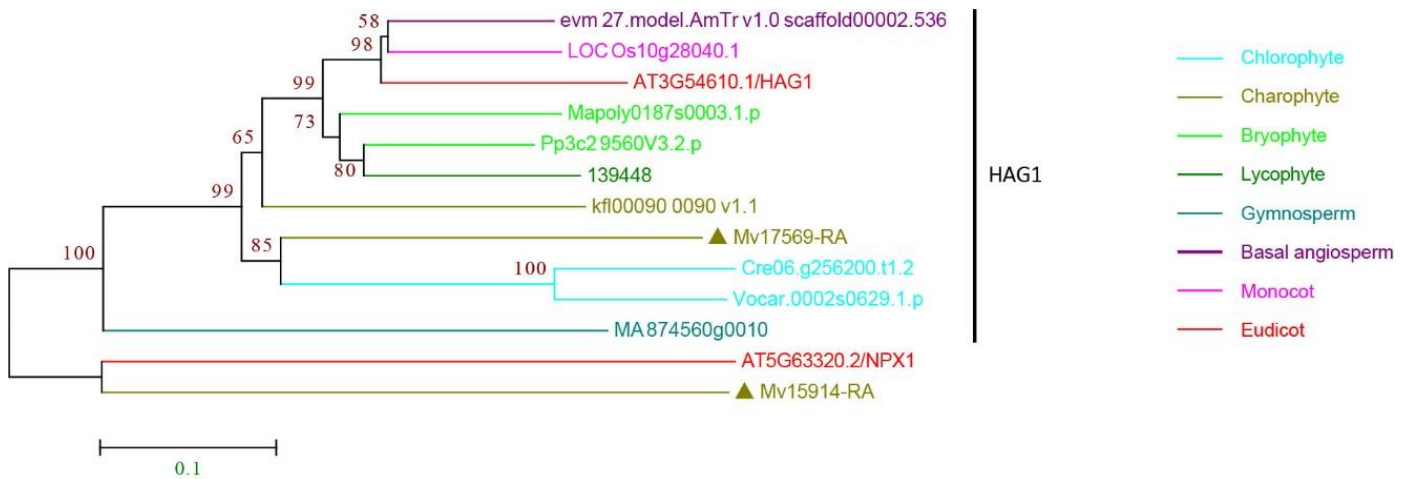

**Data S1AA.** Phylogenetic relationships of HISTONE ACETYLTRANSFERASE OF THE GNAT FAMILY 1 (HAG1) proteins from *M. viride* and other evolutionarily representative species. The *M. viride* sequences were highlighted by triangles. Numbers on the major branches indicate bootstrap values (> 50%) in 1,000 replicates.



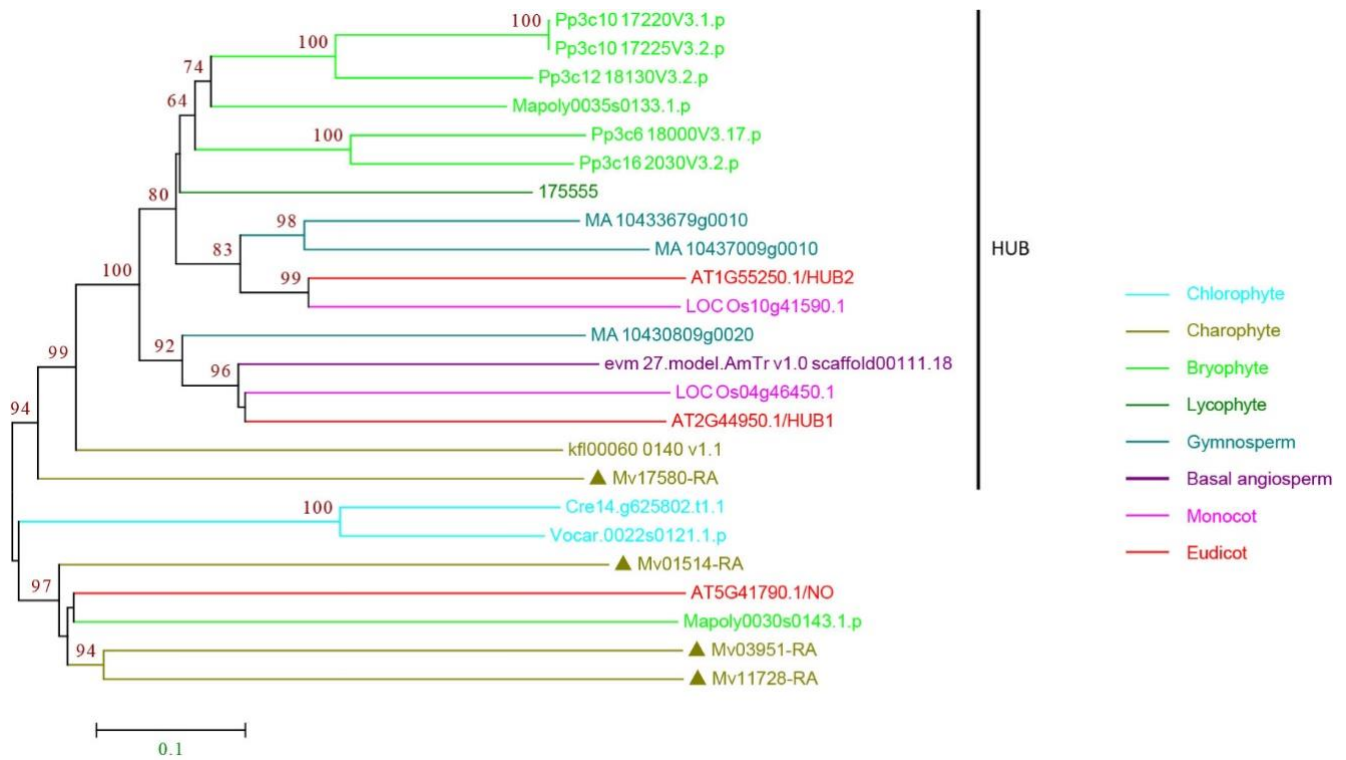

**Data S1AC.** Phylogenetic relationships of HISTONE MONO-UBIQUITINATION (HUB) proteins from *M. viride* and other evolutionarily representative species. The *M. viride* sequences were highlighted by triangles. Numbers on the major branches indicate bootstrap values (> 50%) in 1,000 replicates.



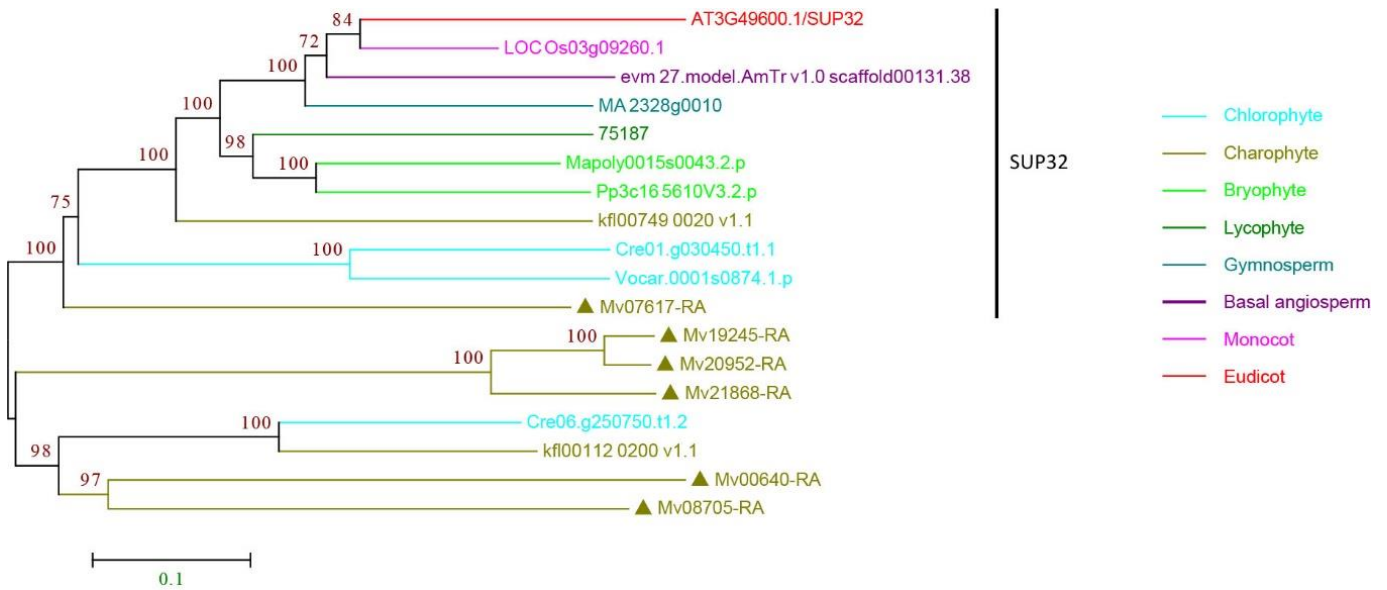

**Data S1AD.** Phylogenetic relationships of UBIQUITIN-SPECIFIC PROTEASE (also called SUP) proteins from *M. viride* and other evolutionarily representative species. The *M. viride* sequences were highlighted by triangles. Numbers on the major branches indicate bootstrap values (> 50%) in 1,000 replicates.

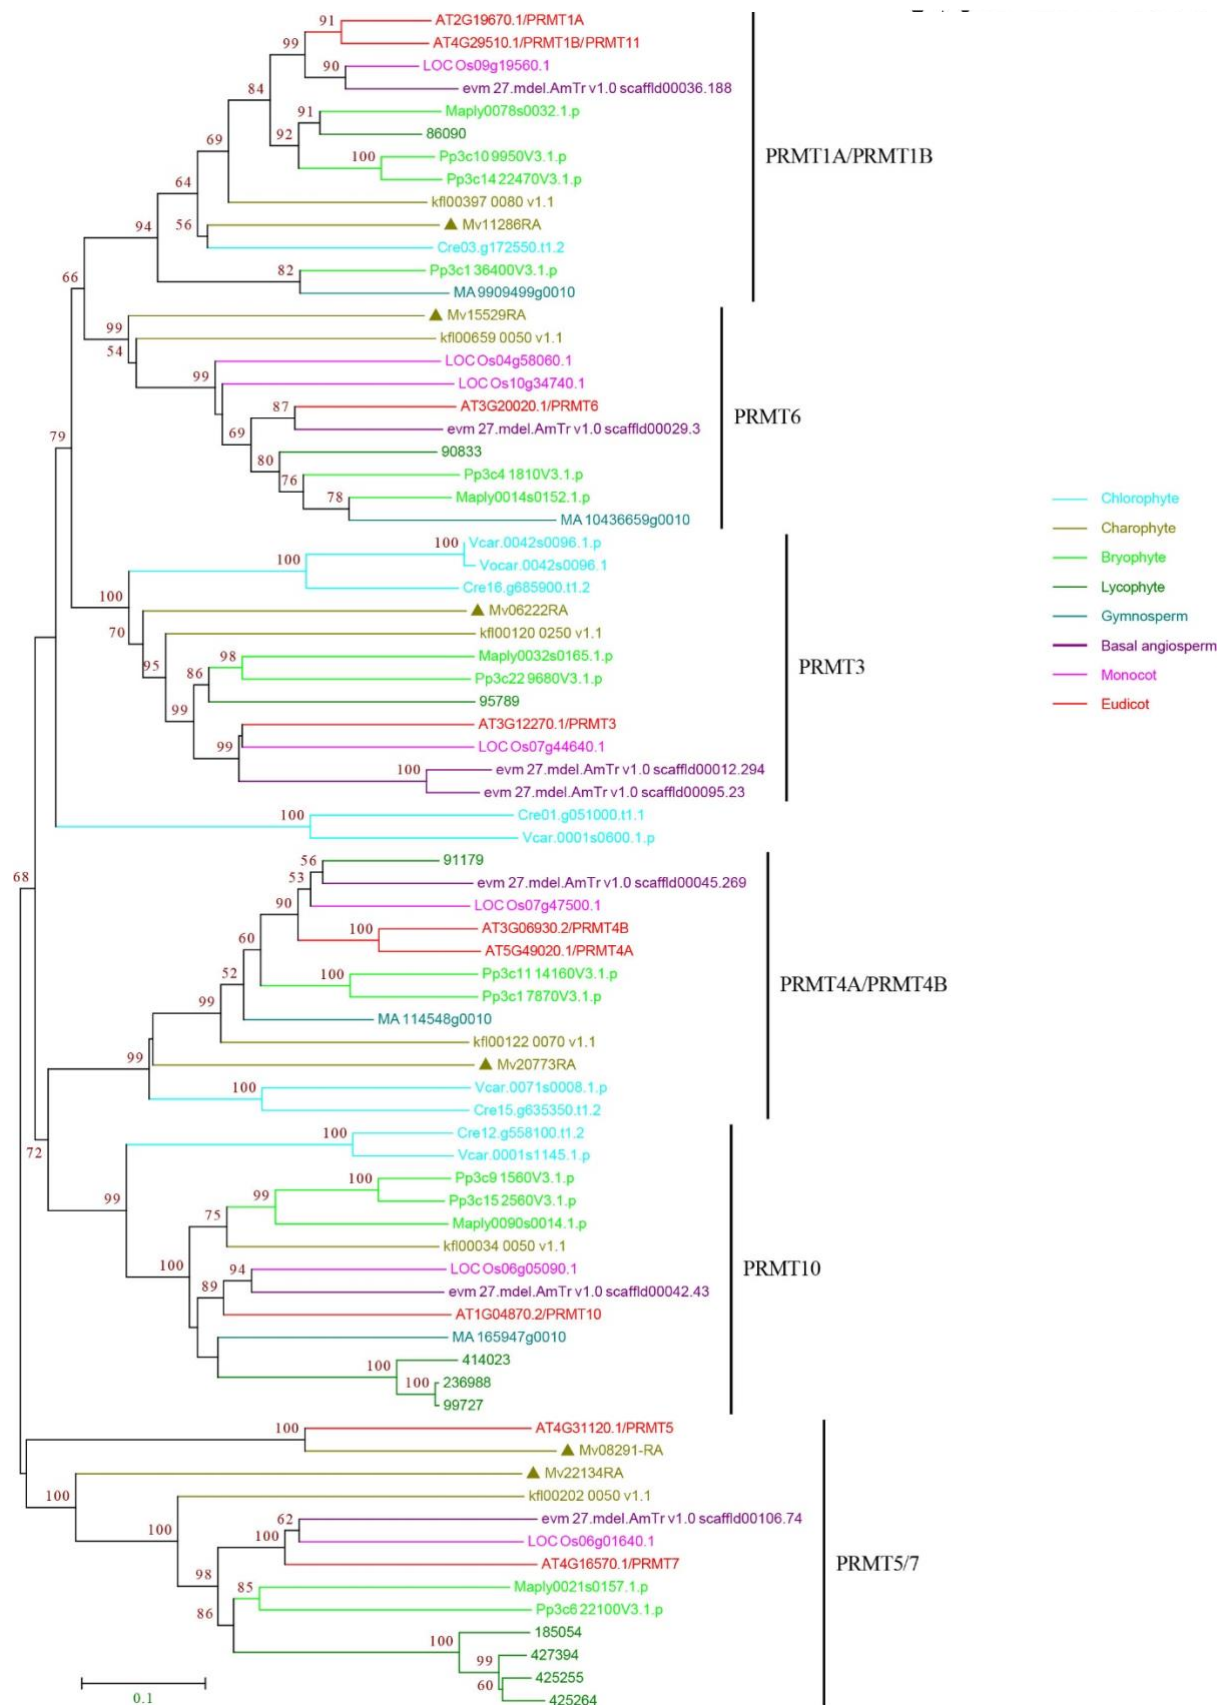

**Data S1AE.** Phylogenetic relationships of PROTEIN ARGININE METHYLTRANSFERASE (PRMT) proteins from *M. viride* and other evolutionarily representative species. The *M. viride* sequences were highlighted by triangles. Numbers on the major branches indicate bootstrap values (> 50%) in 1,000 replicates.

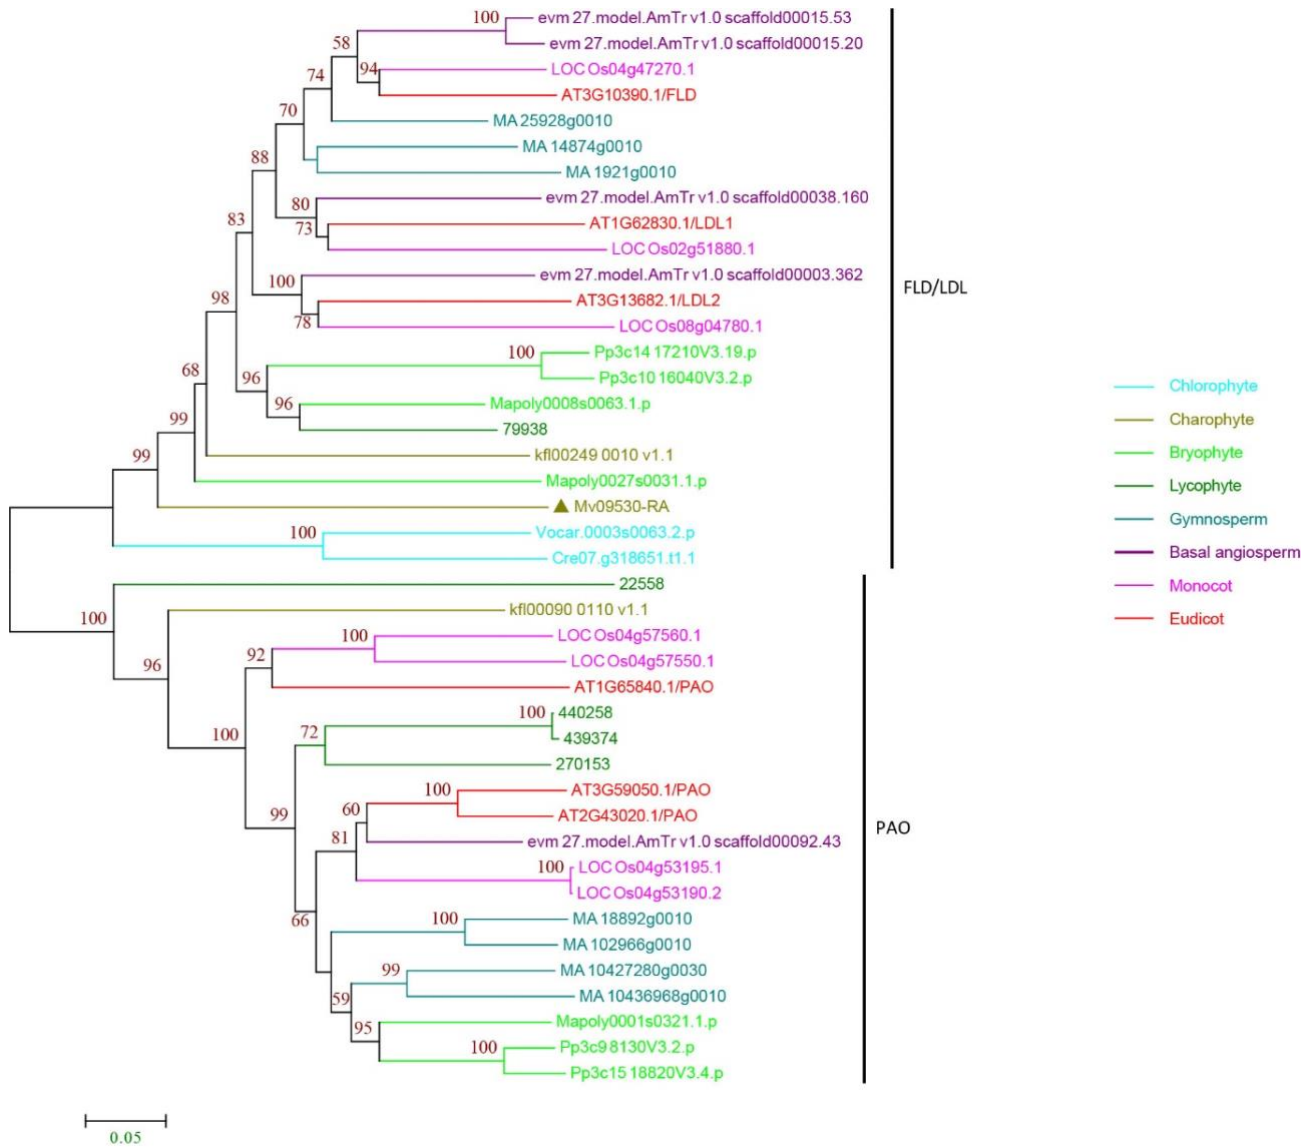

**Data S1AF.** Phylogenetic relationships of FLOWERING LOCUS D (FLD) proteins from *M. viride* and other evolutionarily representative species. The *M. viride* sequence was highlighted by a triangle. Numbers on the major branches indicate bootstrap values (> 50%) in 1,000 replicates.

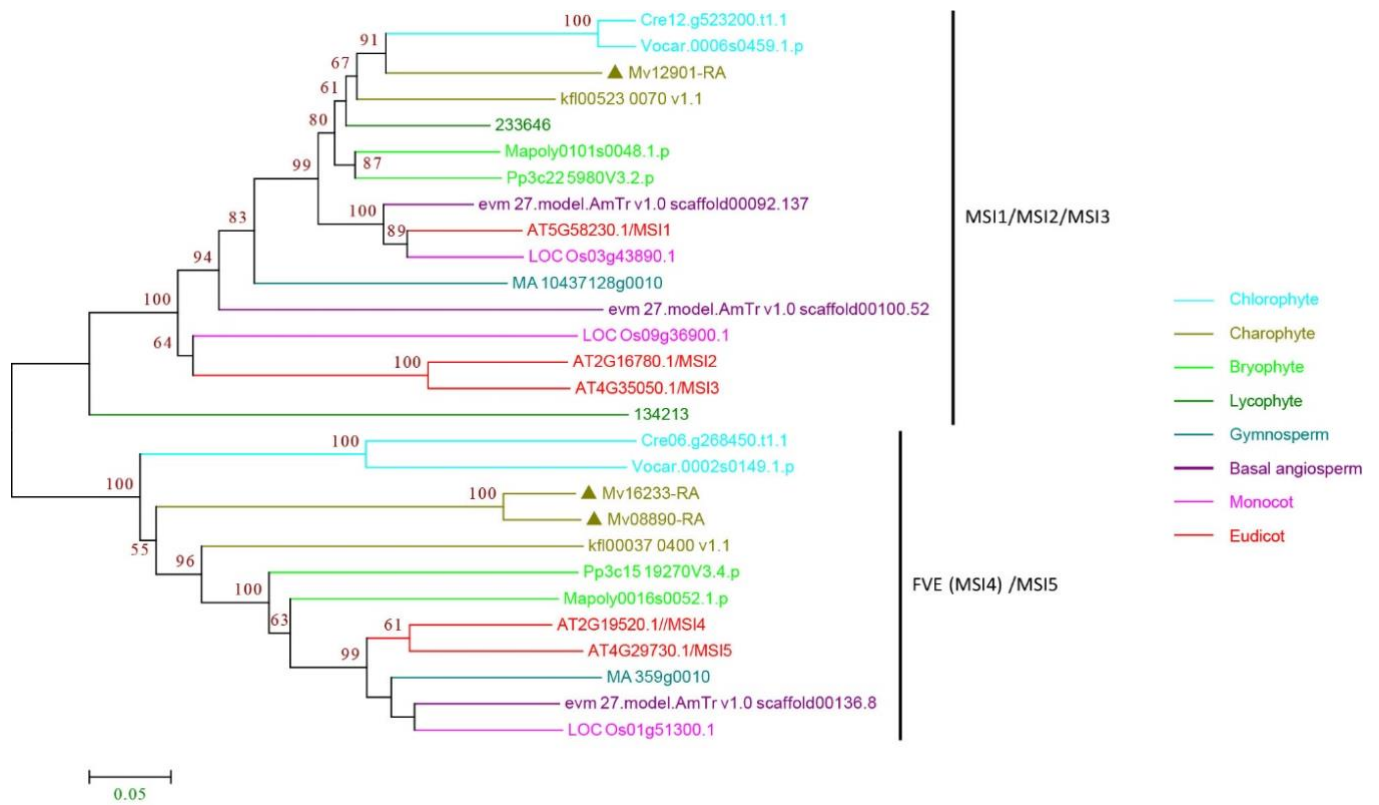

**Data S1AG.** Phylogenetic relationships of MULTICOPY SUPPRESSOR OF IRA (MSI) proteins from *M. viride* and other evolutionarily representative species. The *M. viride* sequences were highlighted by triangles. Numbers on the major branches indicate bootstrap values (> 50%) in 1,000 replicates.

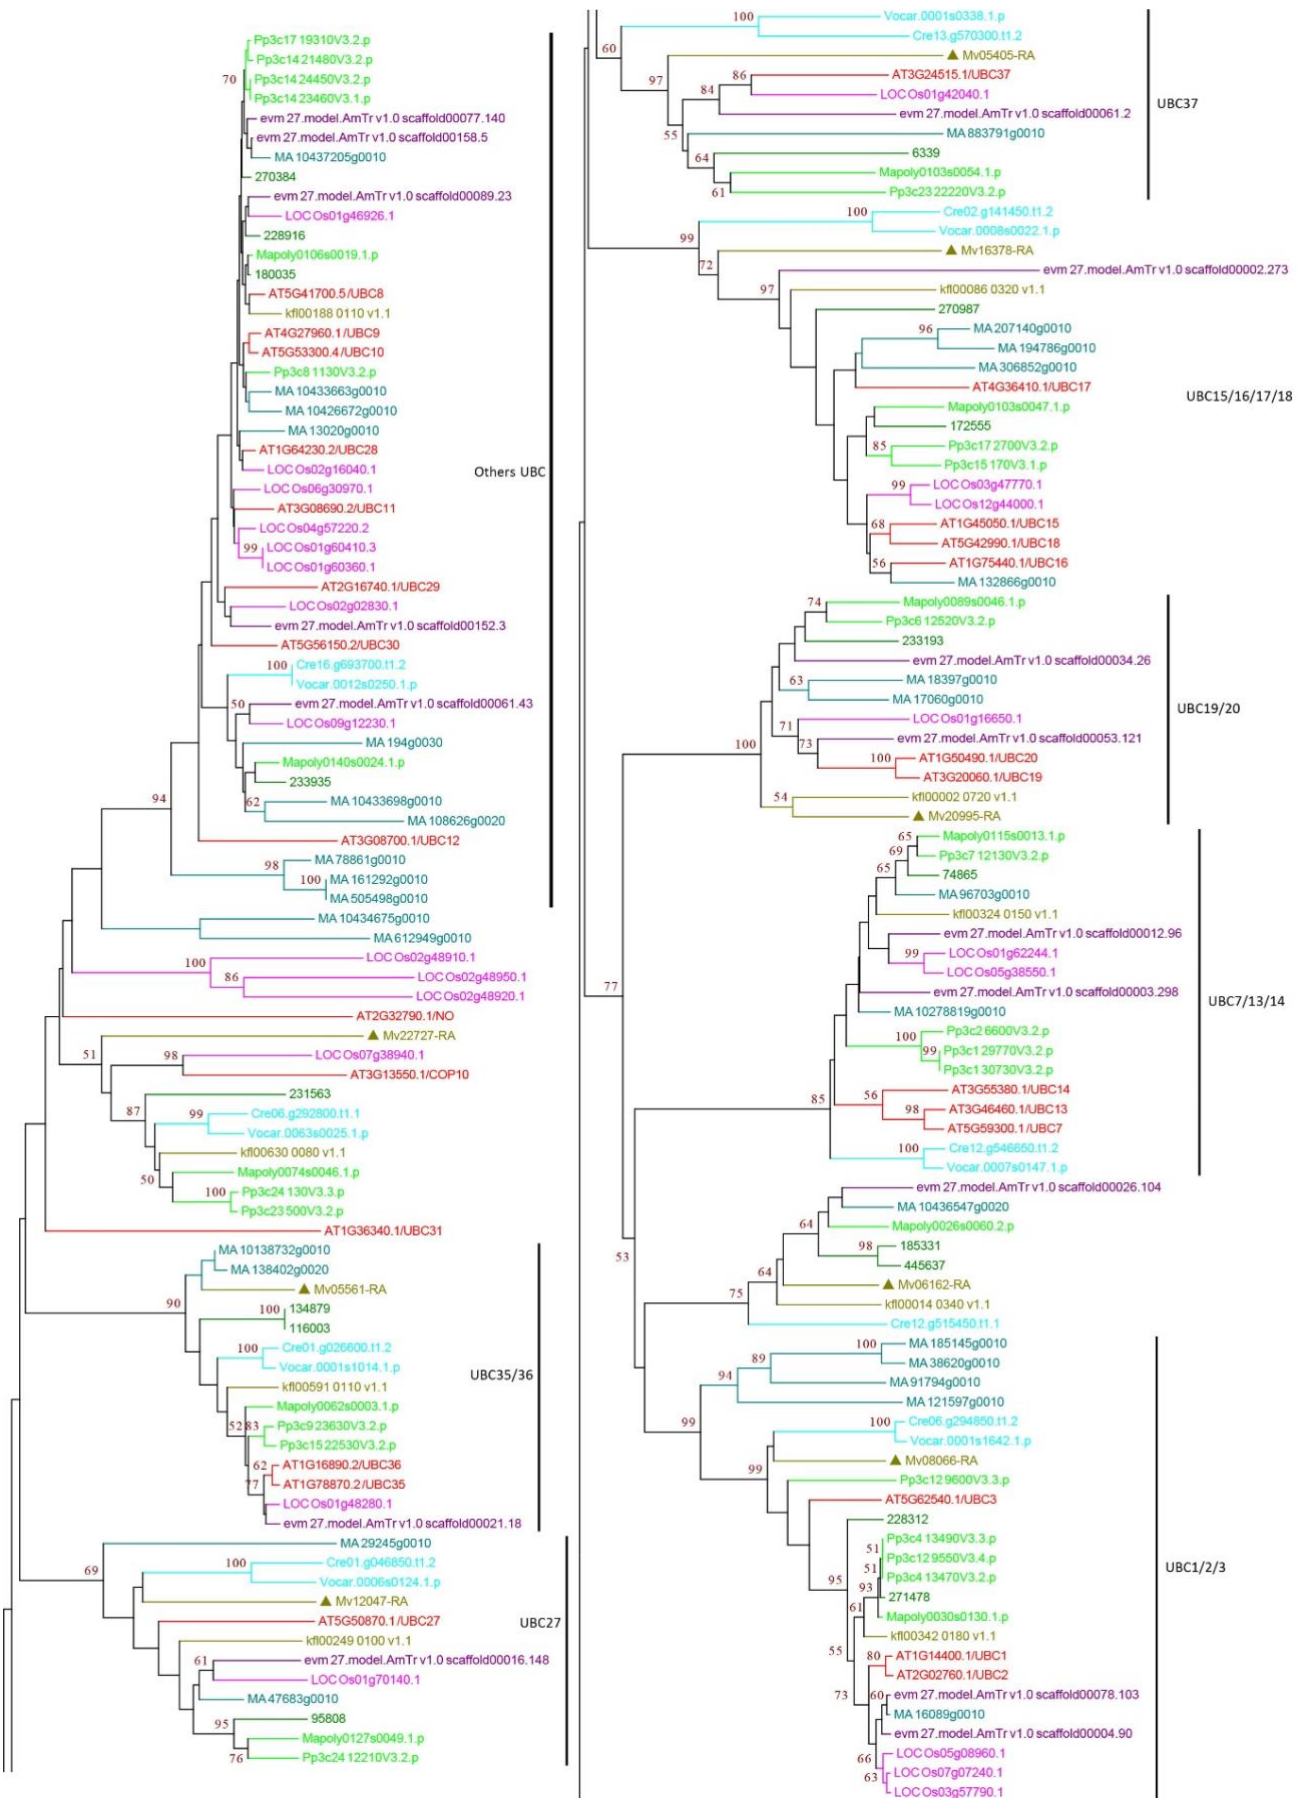

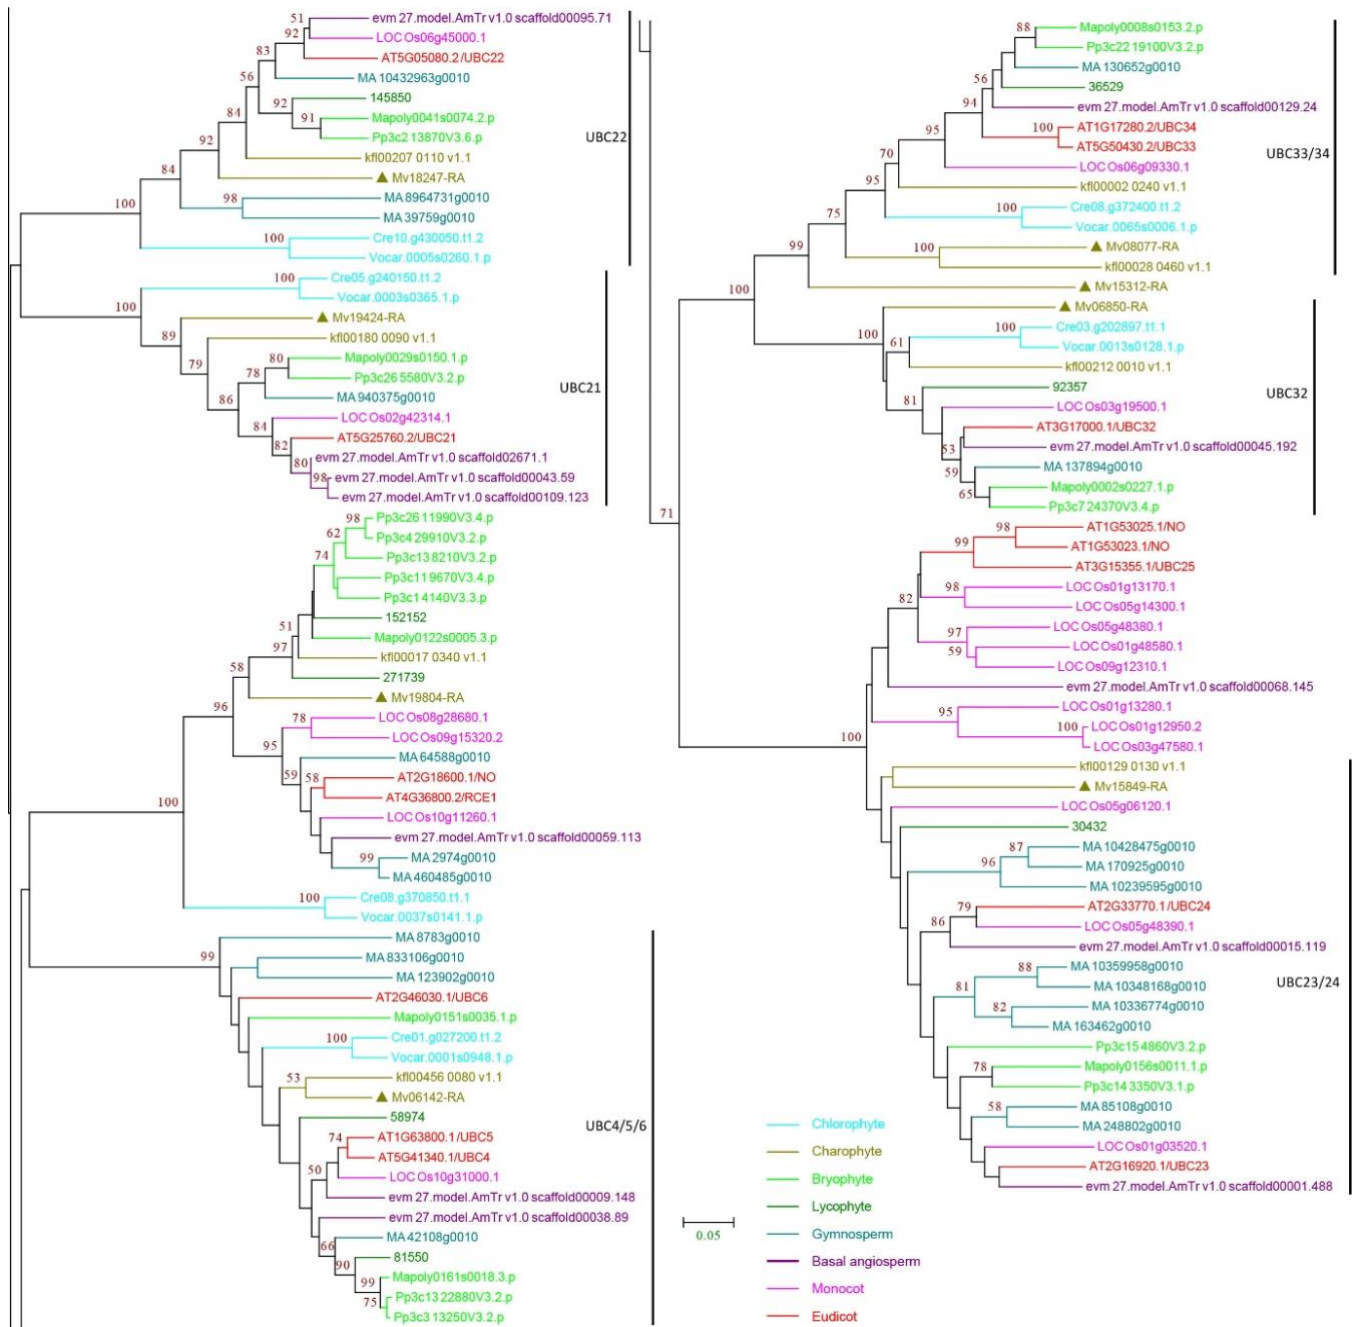

**Data S1AH.** Phylogenetic relationships of UBIQUITIN-CONJUGATING ENZYME (UBC) proteins from *M. viride* and other evolutionarily representative species. The *M. viride* sequences were highlighted by triangles. Numbers on the major branches indicate bootstrap values (> 50%) in 1,000 replicates.

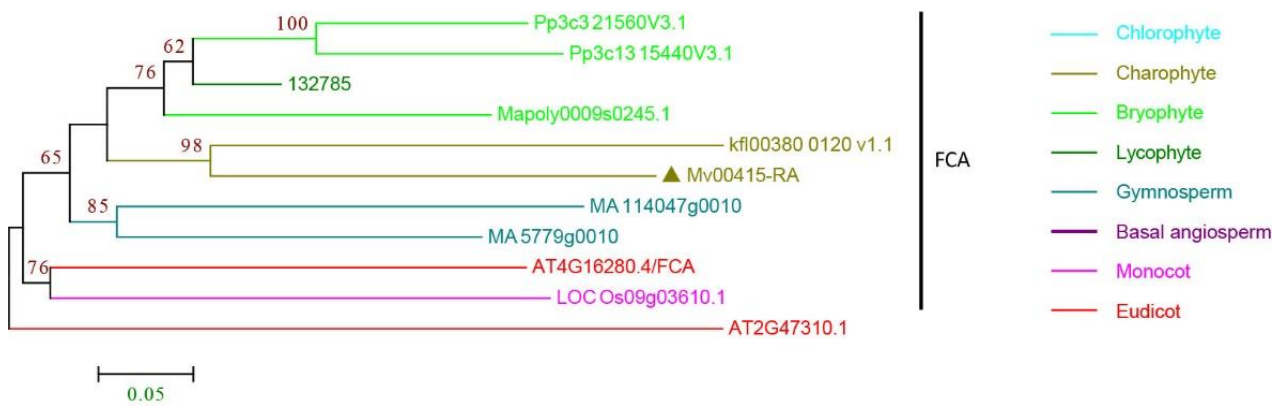

**Data S1AI.** Phylogenetic relationships of FLOWERING CONTROL LOCUS A (FCA) proteins from *M. viride* and other evolutionarily representative species. The *M. viride* sequence was highlighted by a triangle. Numbers on the major branches indicate bootstrap values (> 50%) in 1,000 replicates.

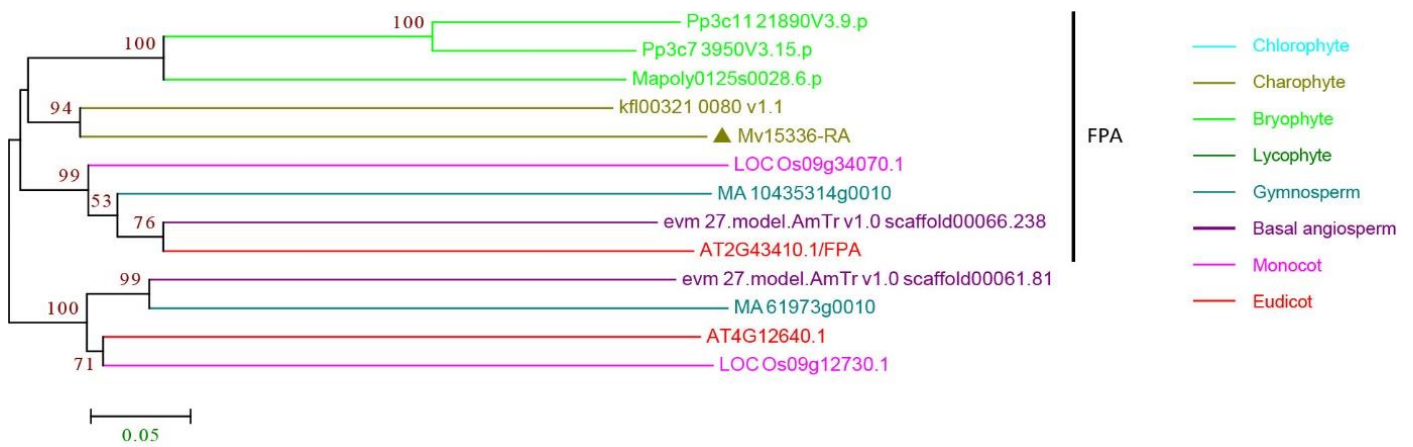

**Data S1AJ.** Phylogenetic relationships of FPA proteins from *M. viride* and other evolutionarily representative species. The *M. viride* sequence was highlighted by a triangle. Numbers on the major branches indicate bootstrap values (> 50%) in 1,000 replicates.



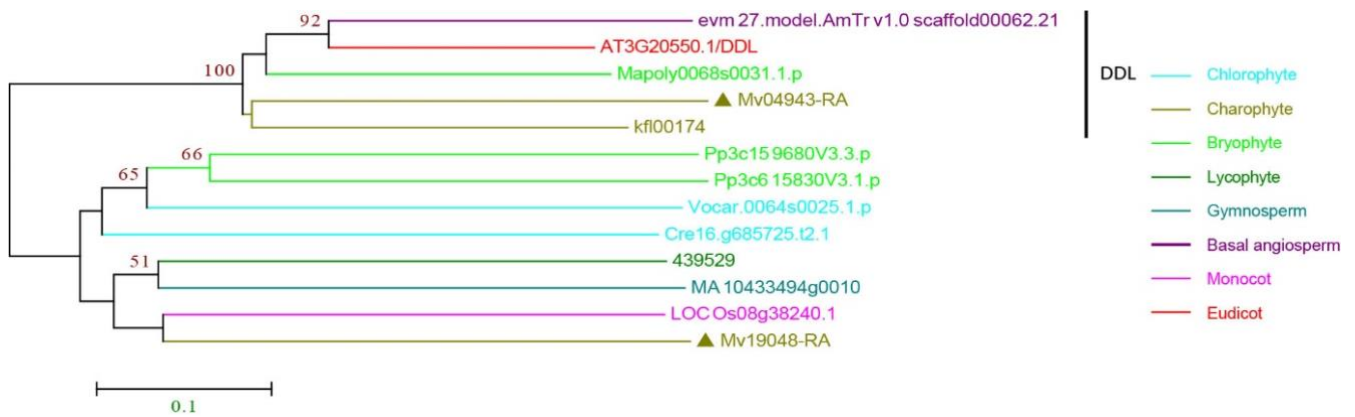

**Data S1AK.** Phylogenetic relationships of DAWDLE (DDL) proteins from *M. viride* and other evolutionarily representative species. The *M. viride* sequences were highlighted by triangles. Numbers on the major branches indicate bootstrap values (> 50%) in 1,000 replicates.

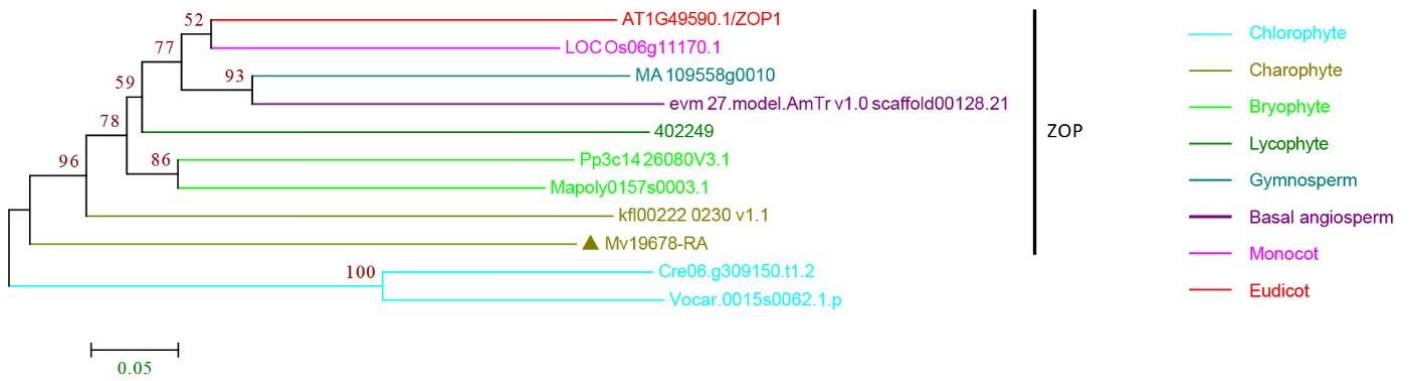

**Data S1AL.** Phylogenetic relationships of ZINC-FINGER AND OCRE DOMAIN-CONTAINING PROTEIN 1 (ZOP1) proteins from *M. viride* and other evolutionarily representative species. The *M. viride* sequence was highlighted by a triangle. Numbers on the major branches indicate bootstrap values (> 50%) in 1,000 replicates.

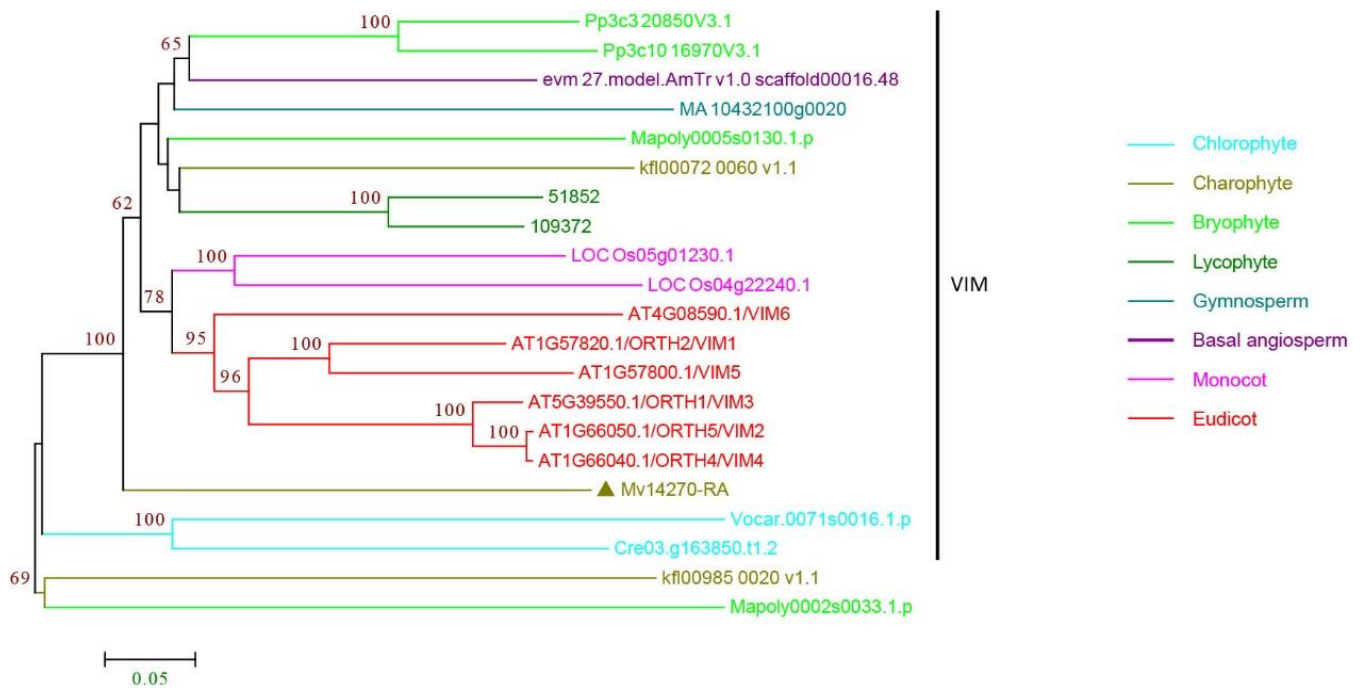

**Data S1AM.** Phylogenetic relationships of VARIANT IN METHYLATION (VIM) proteins from *M. viride* and other evolutionarily representative species. The *M. viride* sequence was highlighted by a triangle. Numbers on the major branches indicate bootstrap values (> 50%) in 1,000 replicates.



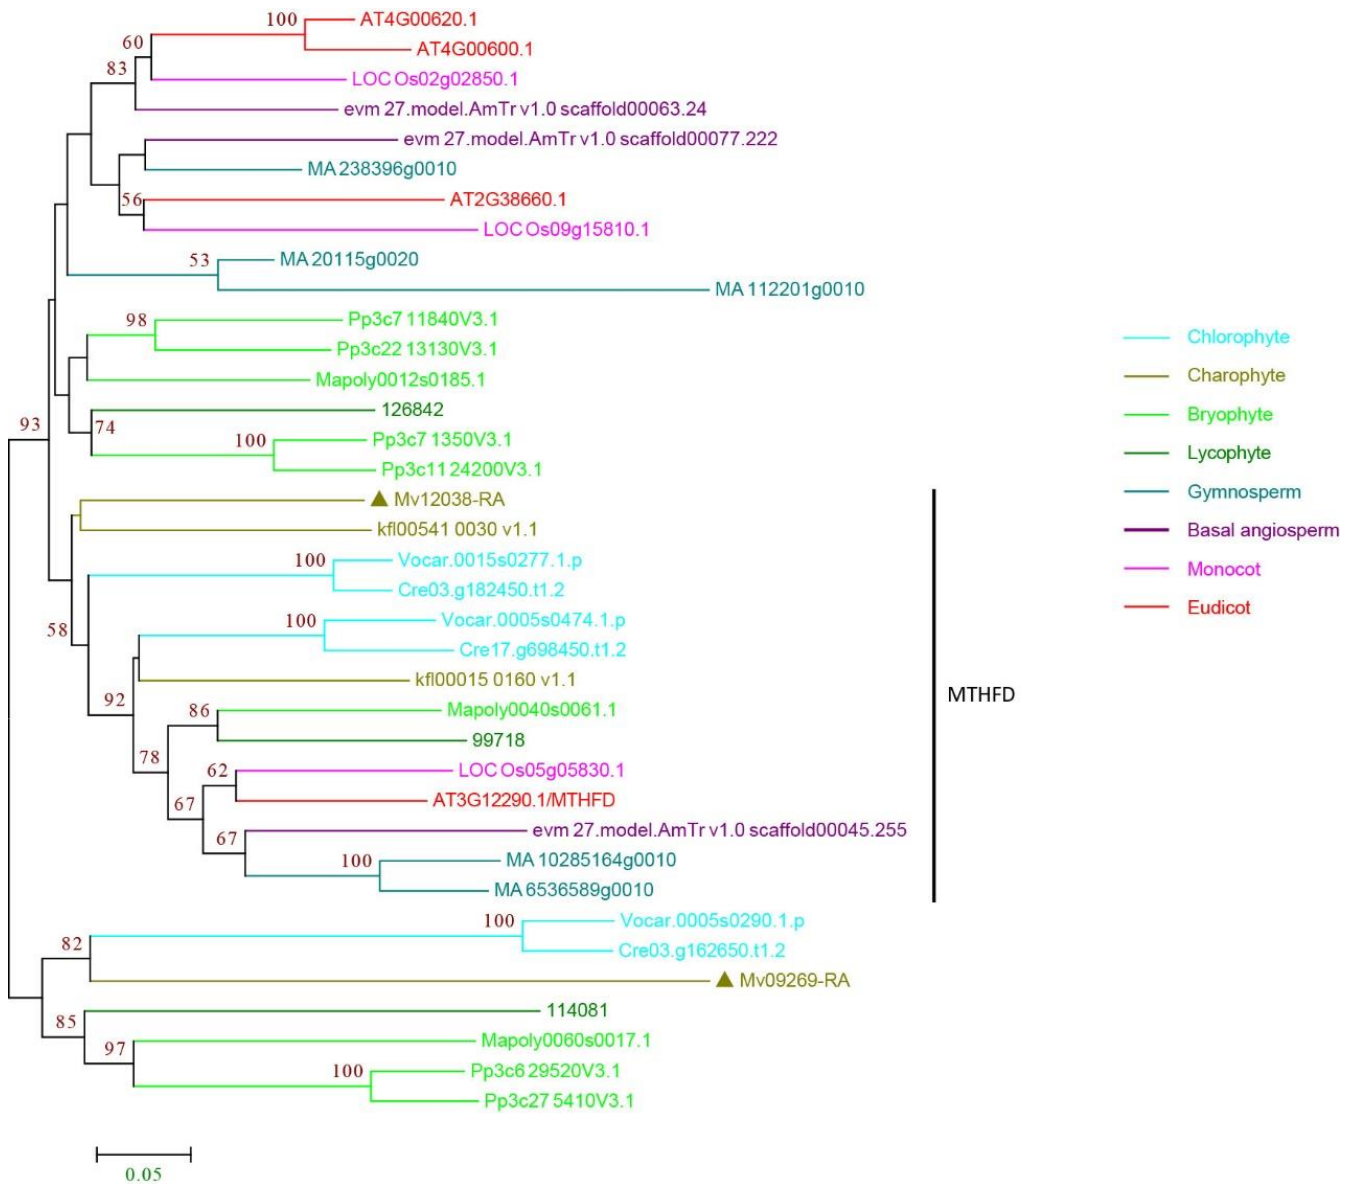

**Data S1AO.** Phylogenetic relationships of METHYLENETETRAHYDROFOLATE DEHYDROGENASE (MTHFD) proteins from *M. viride* and other evolutionarily representative species. The *M. viride* sequences were highlighted by triangles. Numbers on the major branches indicate bootstrap values (> 50%) in 1,000 replicates.

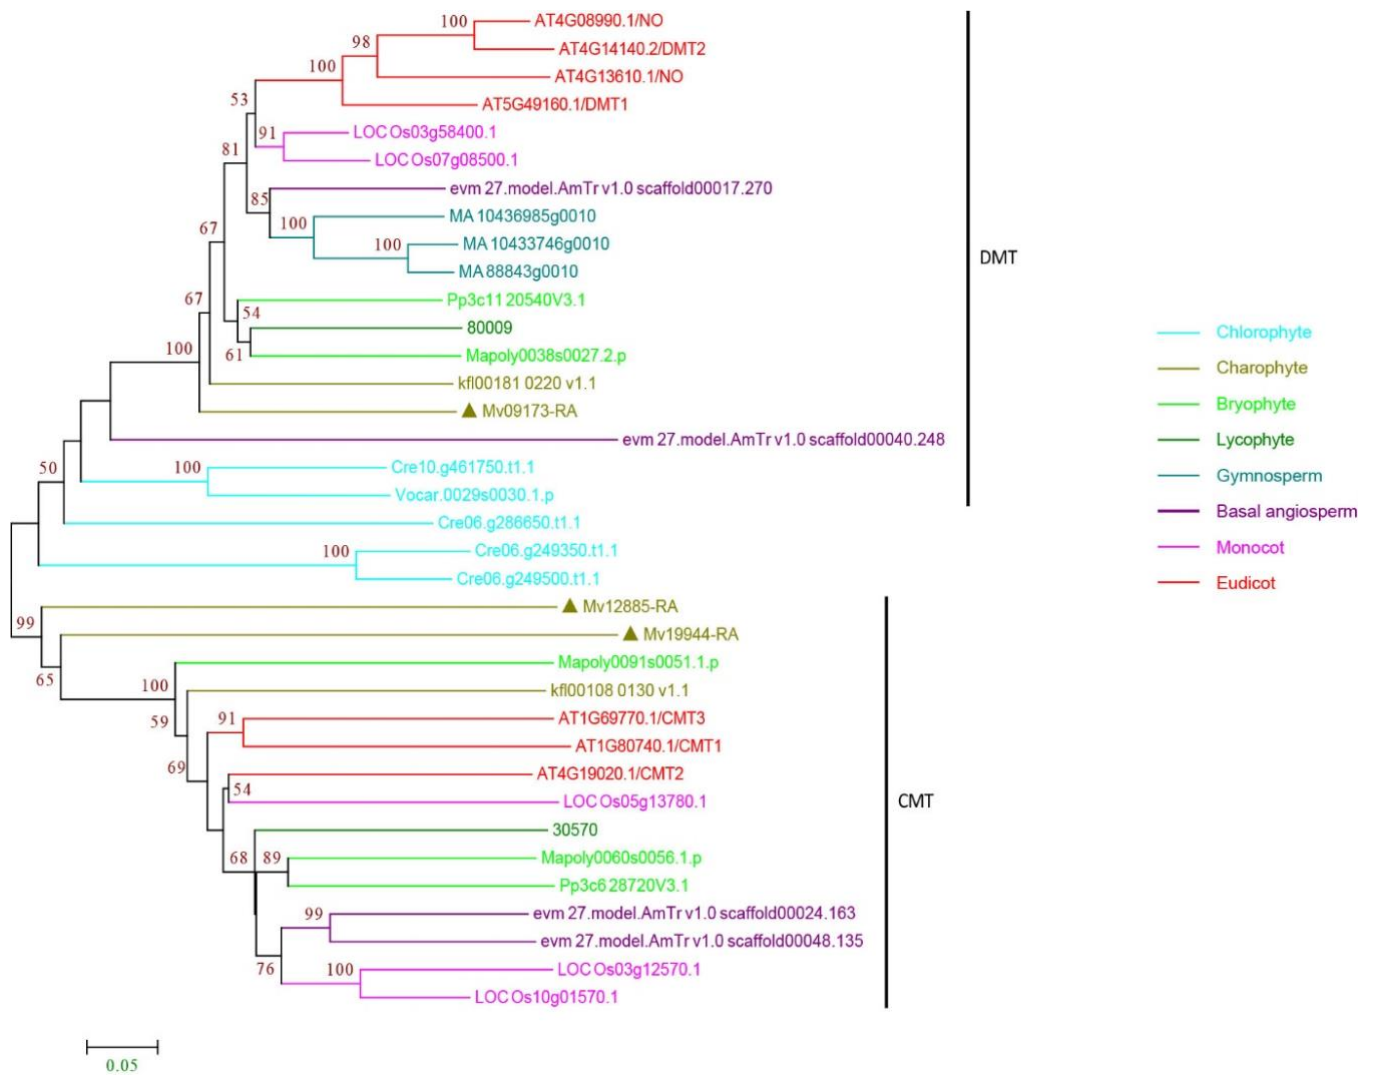

**Data S1AP.** Phylogenetic relationships of CHROMOMETHYLASE/DNA METHYLTRANSFERASE (CMT/DMT) proteins from *M. viride* and other evolutionarily representative species. The *M. viride* sequences were highlighted by triangles. Numbers on the major branches indicate bootstrap values (> 50%) in 1,000 replicates.

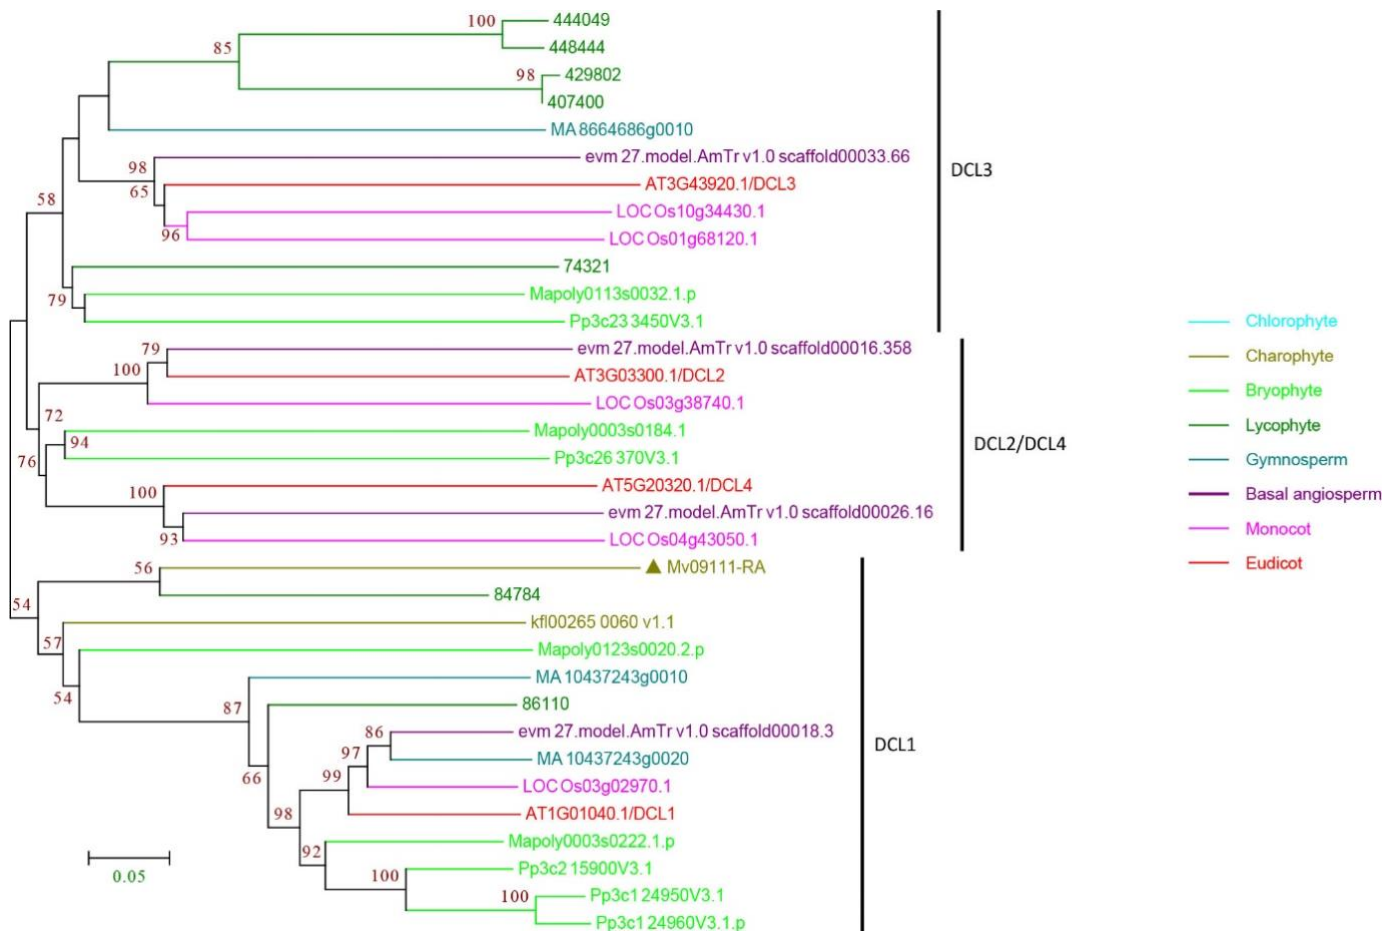

**Data S1AQ.** Phylogenetic relationships of DICER-LIKE (DCL) proteins from *M. viride* and other evolutionarily representative species. The *M. viride* sequence was highlighted by a triangle. Numbers on the major branches indicate bootstrap values (> 50%) in 1,000 replicates.

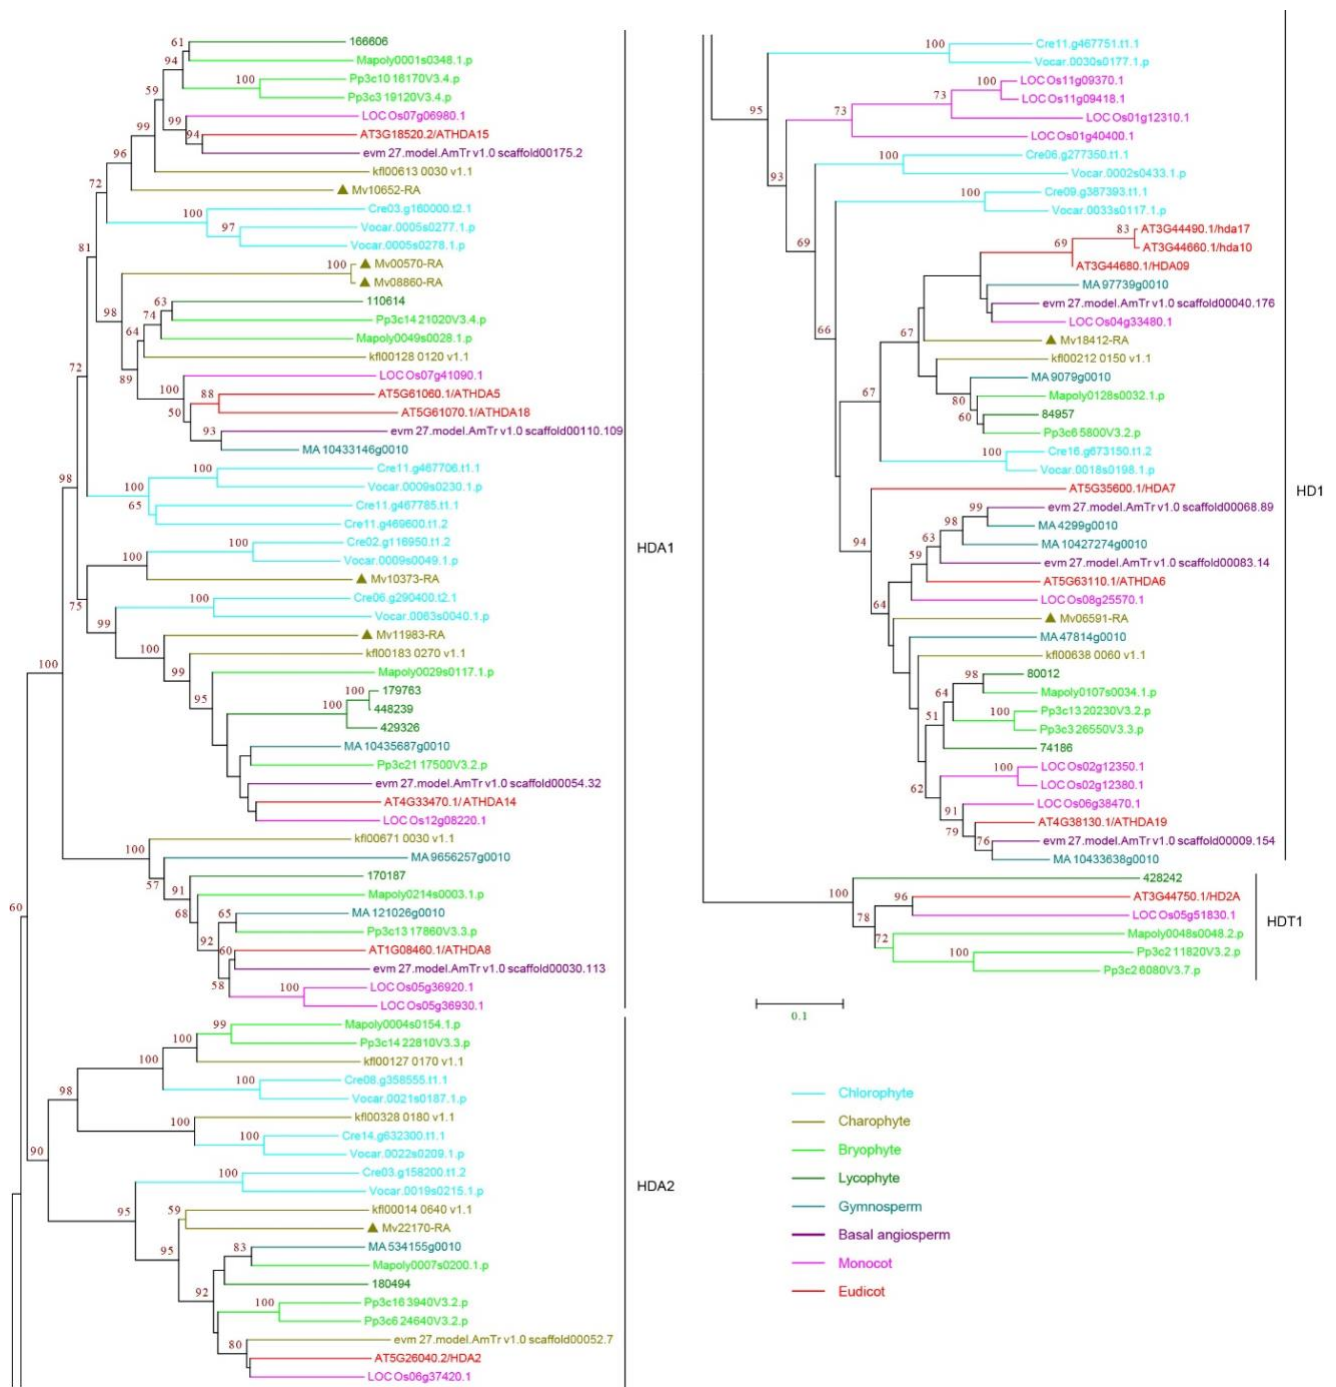

**Data S1AR.** Phylogenetic relationships of HISTONE DEACETYLASE (HD) proteins from *M. viride* and other evolutionarily representative species. The *M. viride* sequences were highlighted by triangles. Numbers on the major branches indicate bootstrap values (> 50%) in 1,000 replicates.



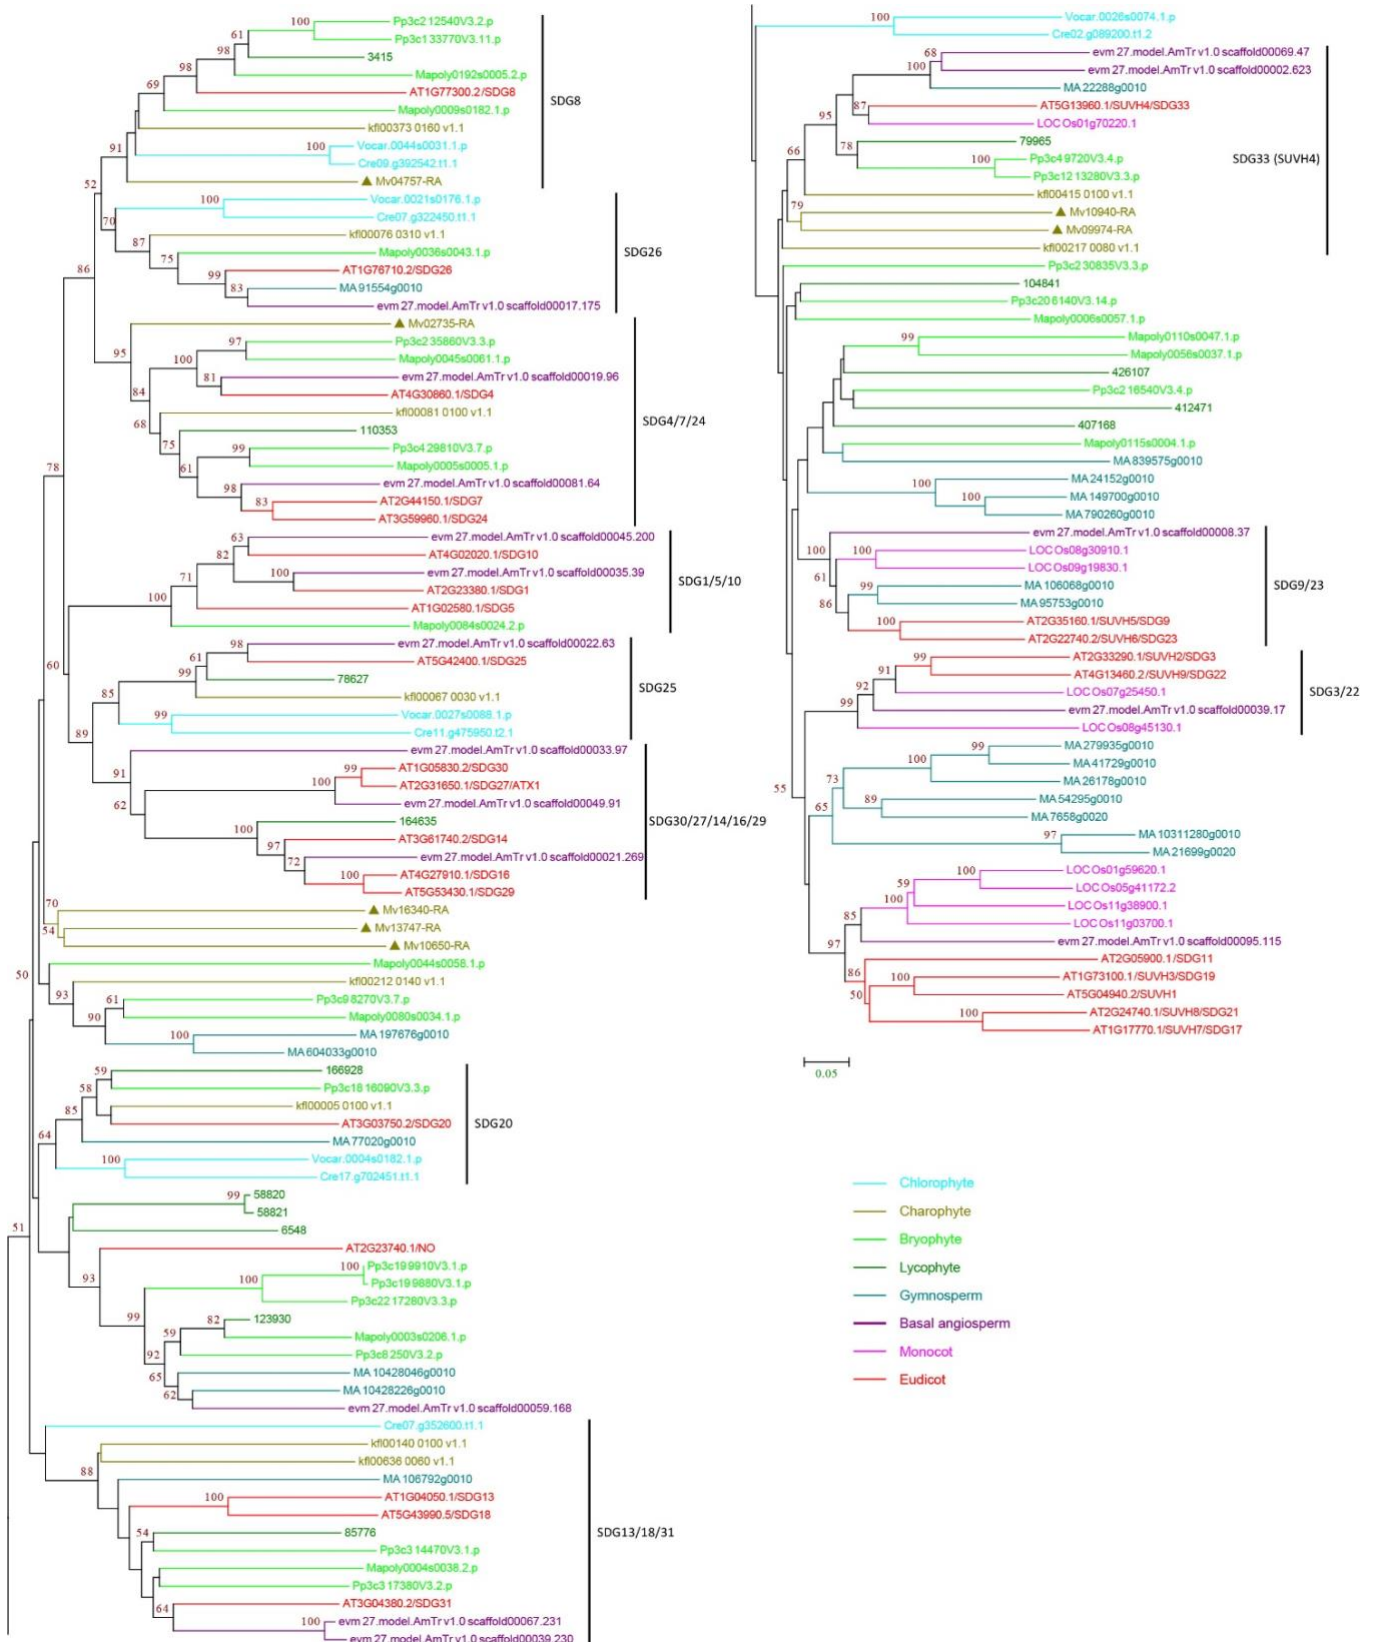

**Data S1AS.** Phylogenetic relationships of SET DOMAIN PROTEIN (SDG) proteins from *M. viride* and other evolutionarily representative species. The *M. viride* sequences were highlighted by triangles. Numbers on the major branches indicate bootstrap values (> 50%) in 1,000 replicates.

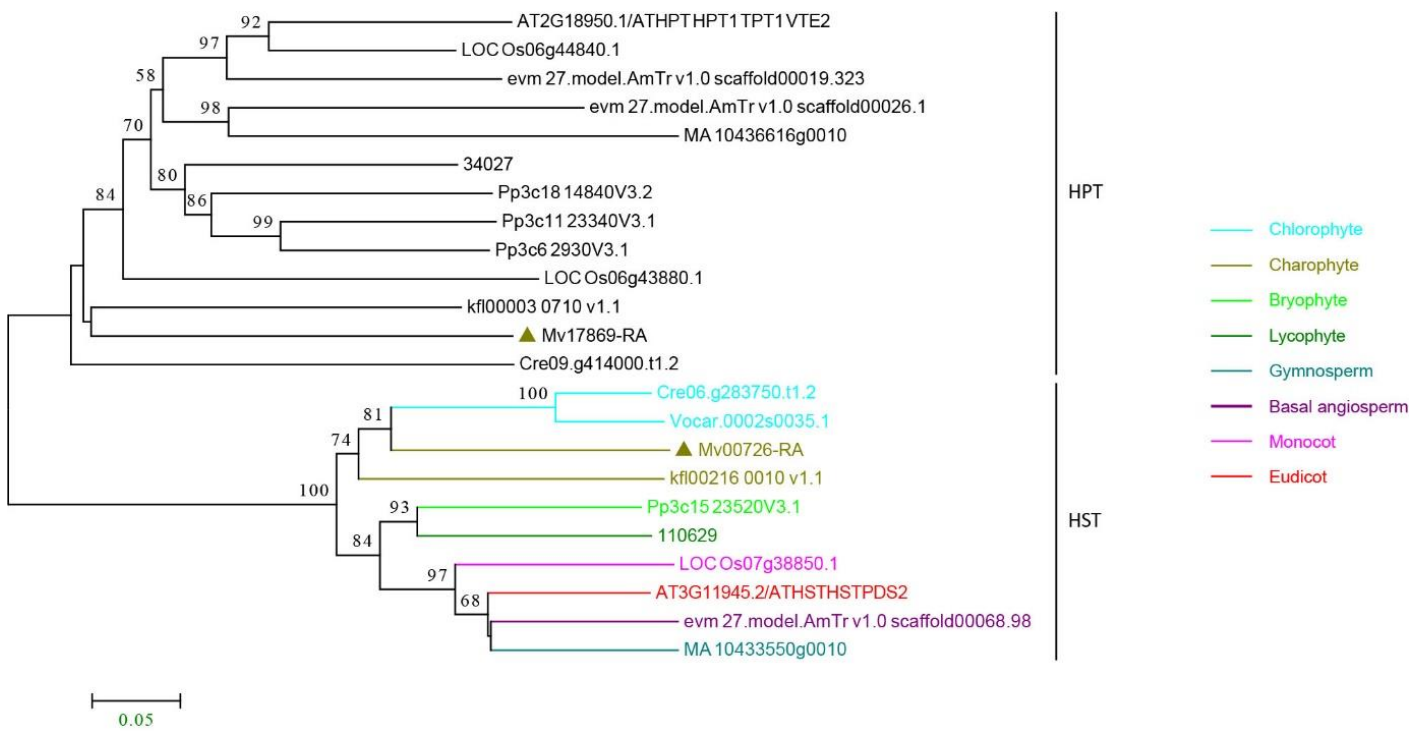

**Data S1AT.** Phylogenetic relationships of HOMOGENITISATE PRENYLTRANSFERASE (HST) proteins from *M. viride* and other evolutionarily representative species. The *M. viride* sequences were highlighted by triangles. Numbers on the major branches indicate bootstrap values (> 50%) in 1,000 replicates.

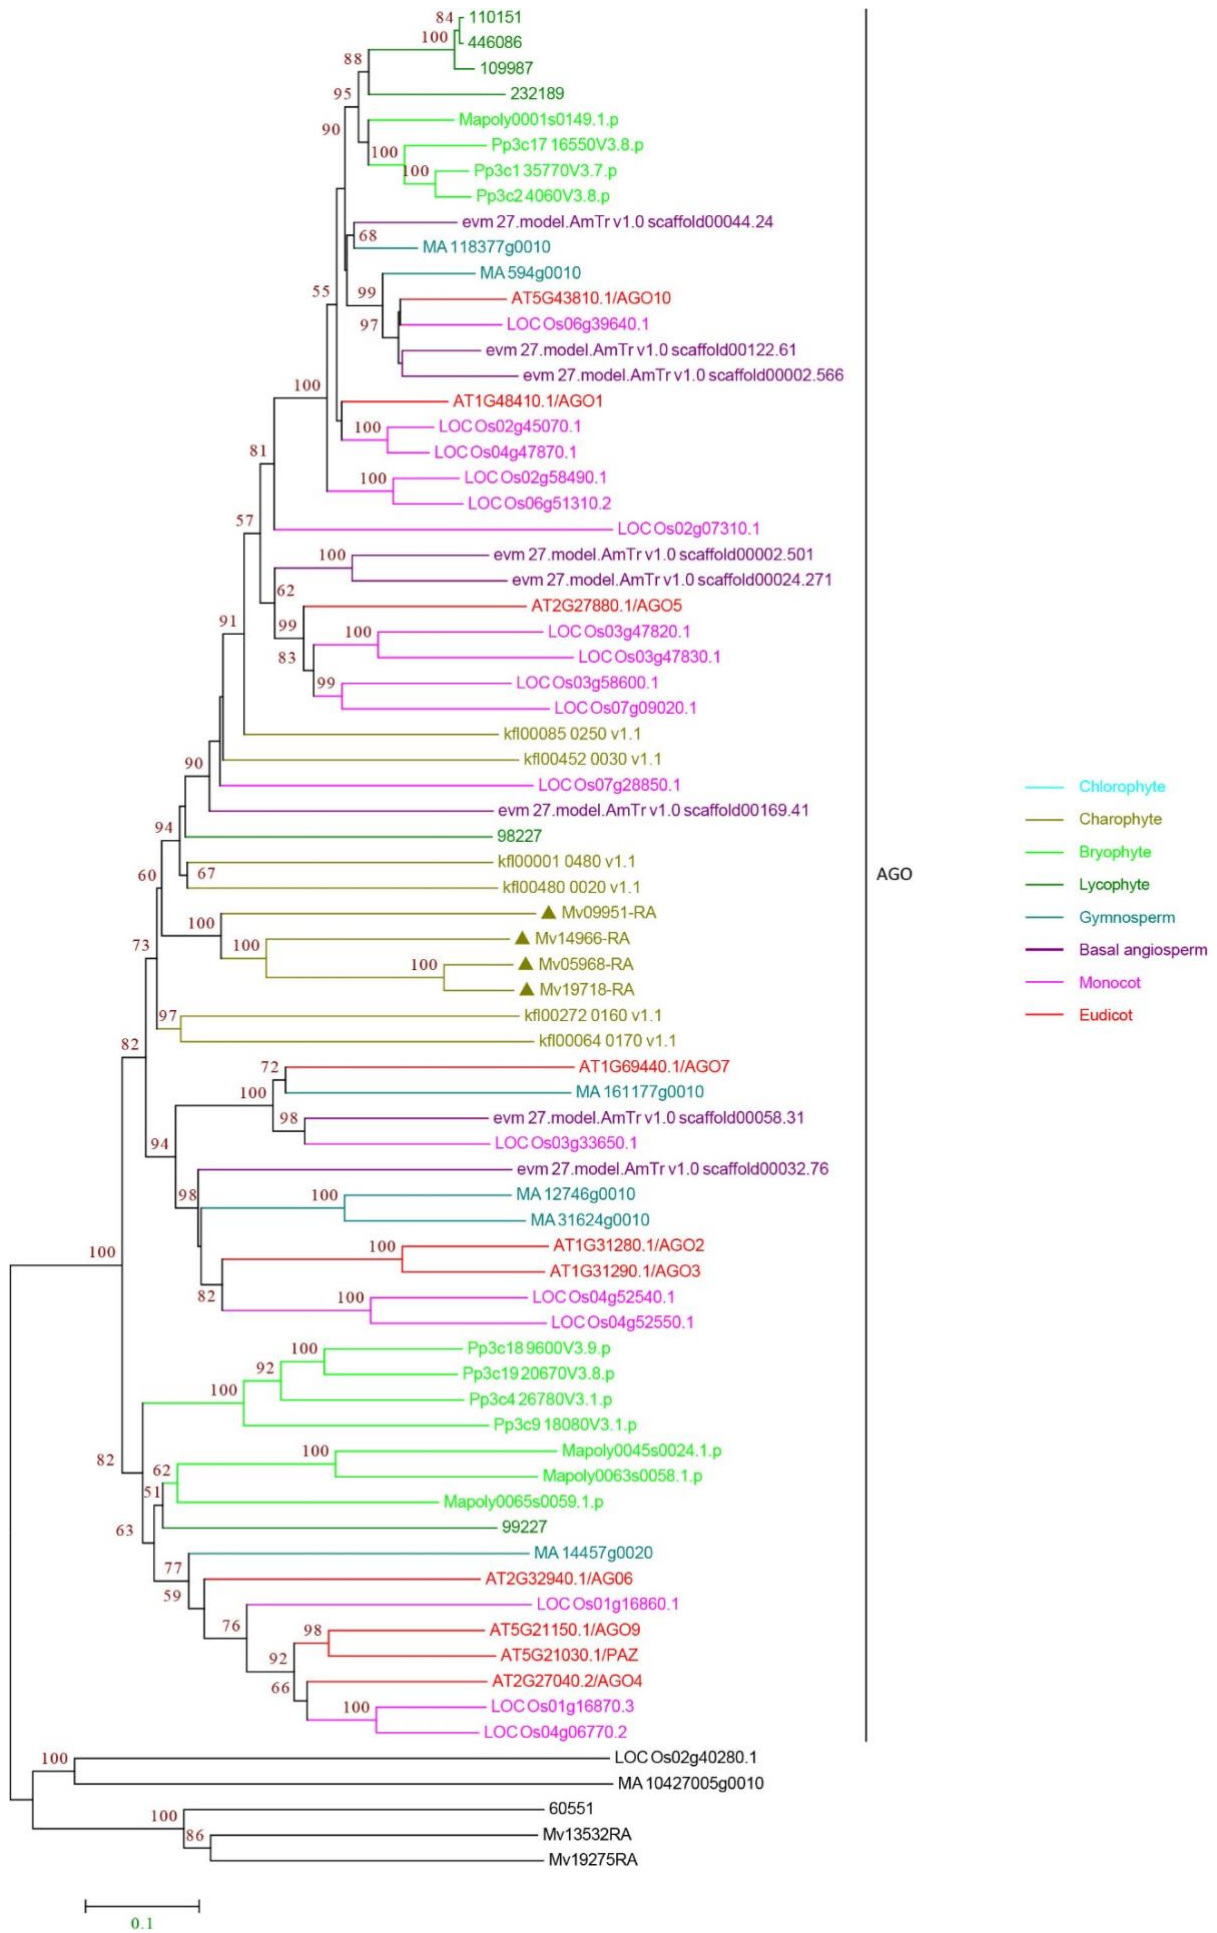

**Data S1AU.** Phylogenetic relationships of ARGONAUTE (AGO) proteins from *M. viride* and other evolutionarily representative species. The *M. viride* sequences were highlighted by triangles. Numbers on the major branches indicate bootstrap values (> 50%) in 1,000 replicates.

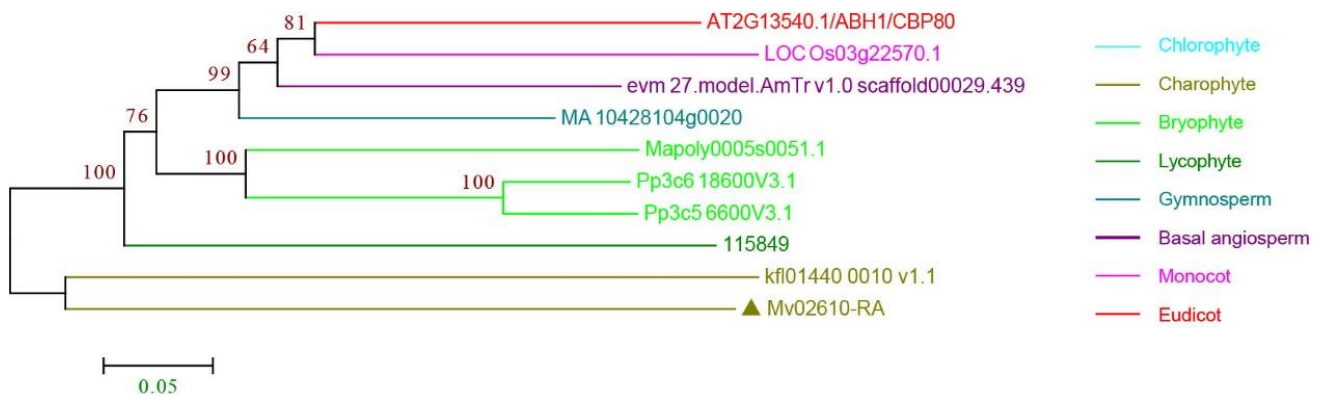

**Data S1AV.** Phylogenetic relationships of ABA HYPERSENSITIVE 1 (ABH1) proteins from *M. viride* and other evolutionarily representative species. The *M. viride* sequence was highlighted by a triangle. Numbers on the major branches indicate bootstrap values (> 50%) in 1,000 replicates.

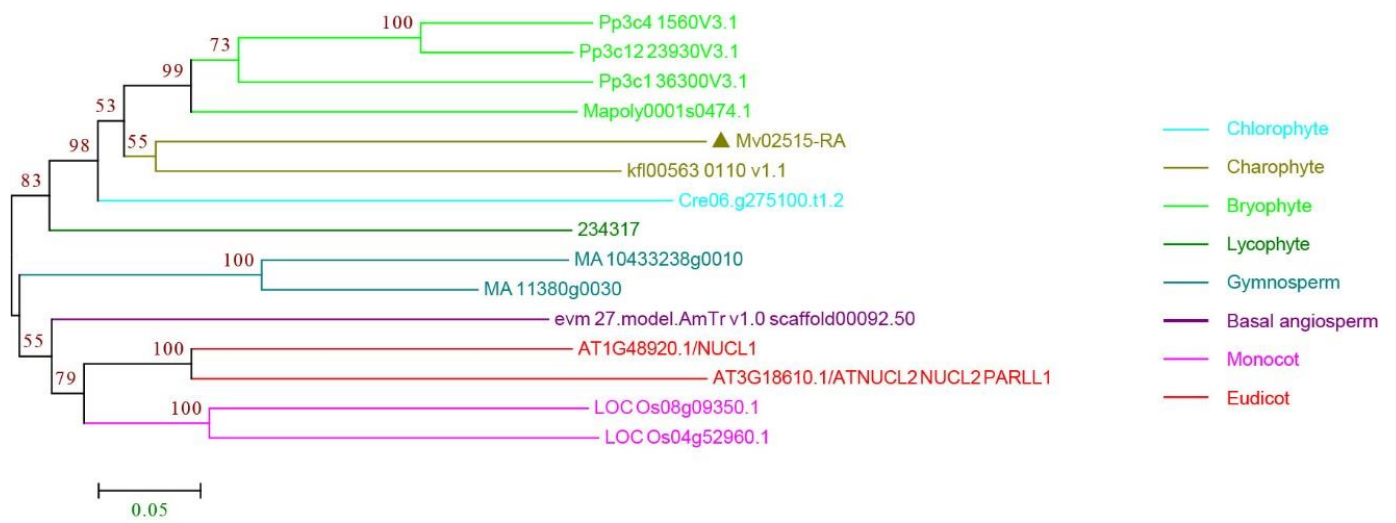

**Data S1AW.** Phylogenetic relationships of NUCLEOLIN-LIKE (NUCL) proteins from *M. viride* and other evolutionarily representative species. The *M. viride* sequence was highlighted by a triangle. Numbers on the major branches indicate bootstrap values (> 50%) in 1,000 replicates.

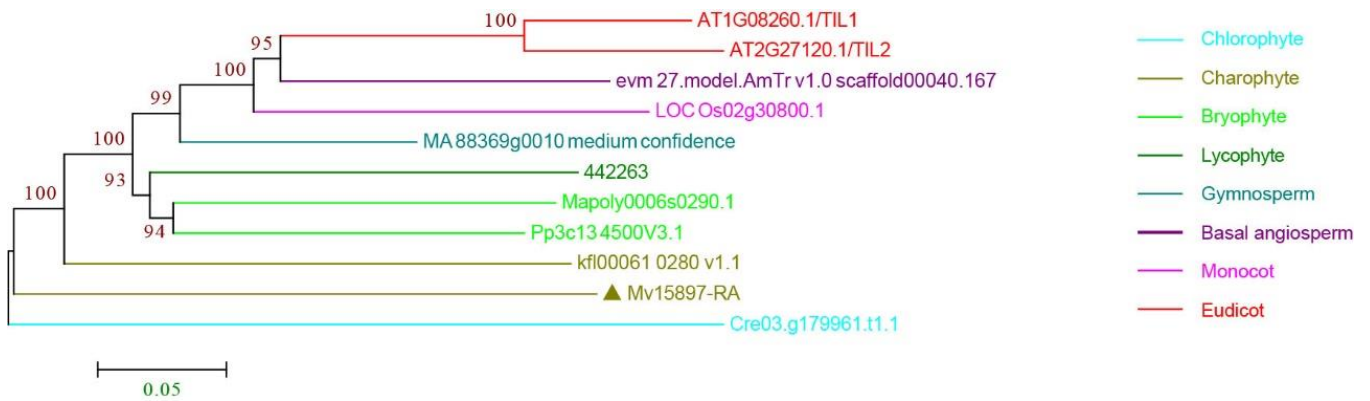

**Data S1AX.** Phylogenetic relationships of EARLY IN SHORT DAYS 7 (ESD7 or TIL) proteins from *M. viride* and other evolutionarily representative species. The *M. viride* sequence was highlighted by a triangle. Numbers on the major branches indicate bootstrap values (> 50%) in 1,000 replicates.

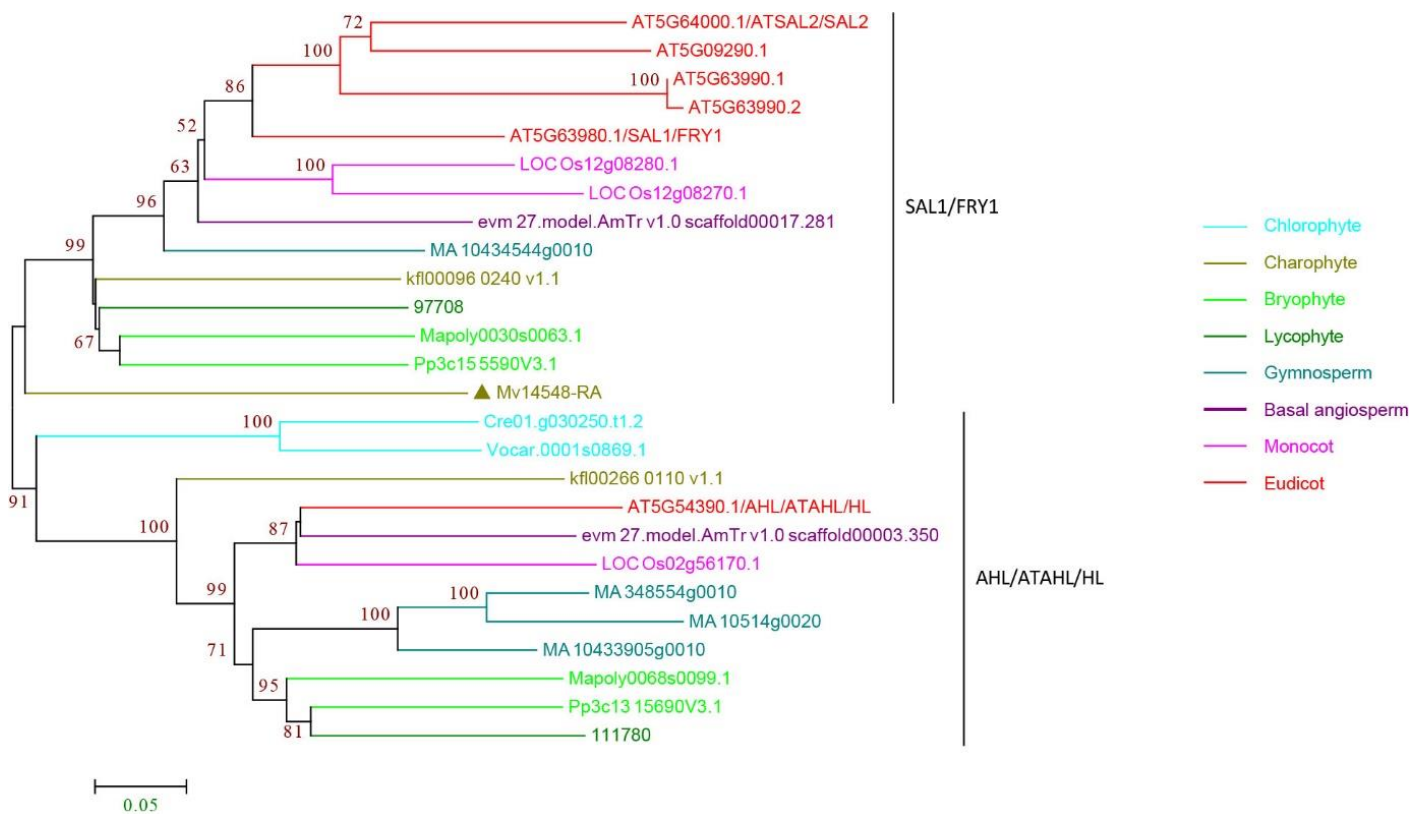

**Data S1AY.** Phylogenetic relationships of SAL1 proteins from *M. viride* and other evolutionarily representative species. The *M. viride* sequence was highlighted by a triangle. Numbers on the major branches indicate bootstrap values (> 50%) in 1,000 replicates.



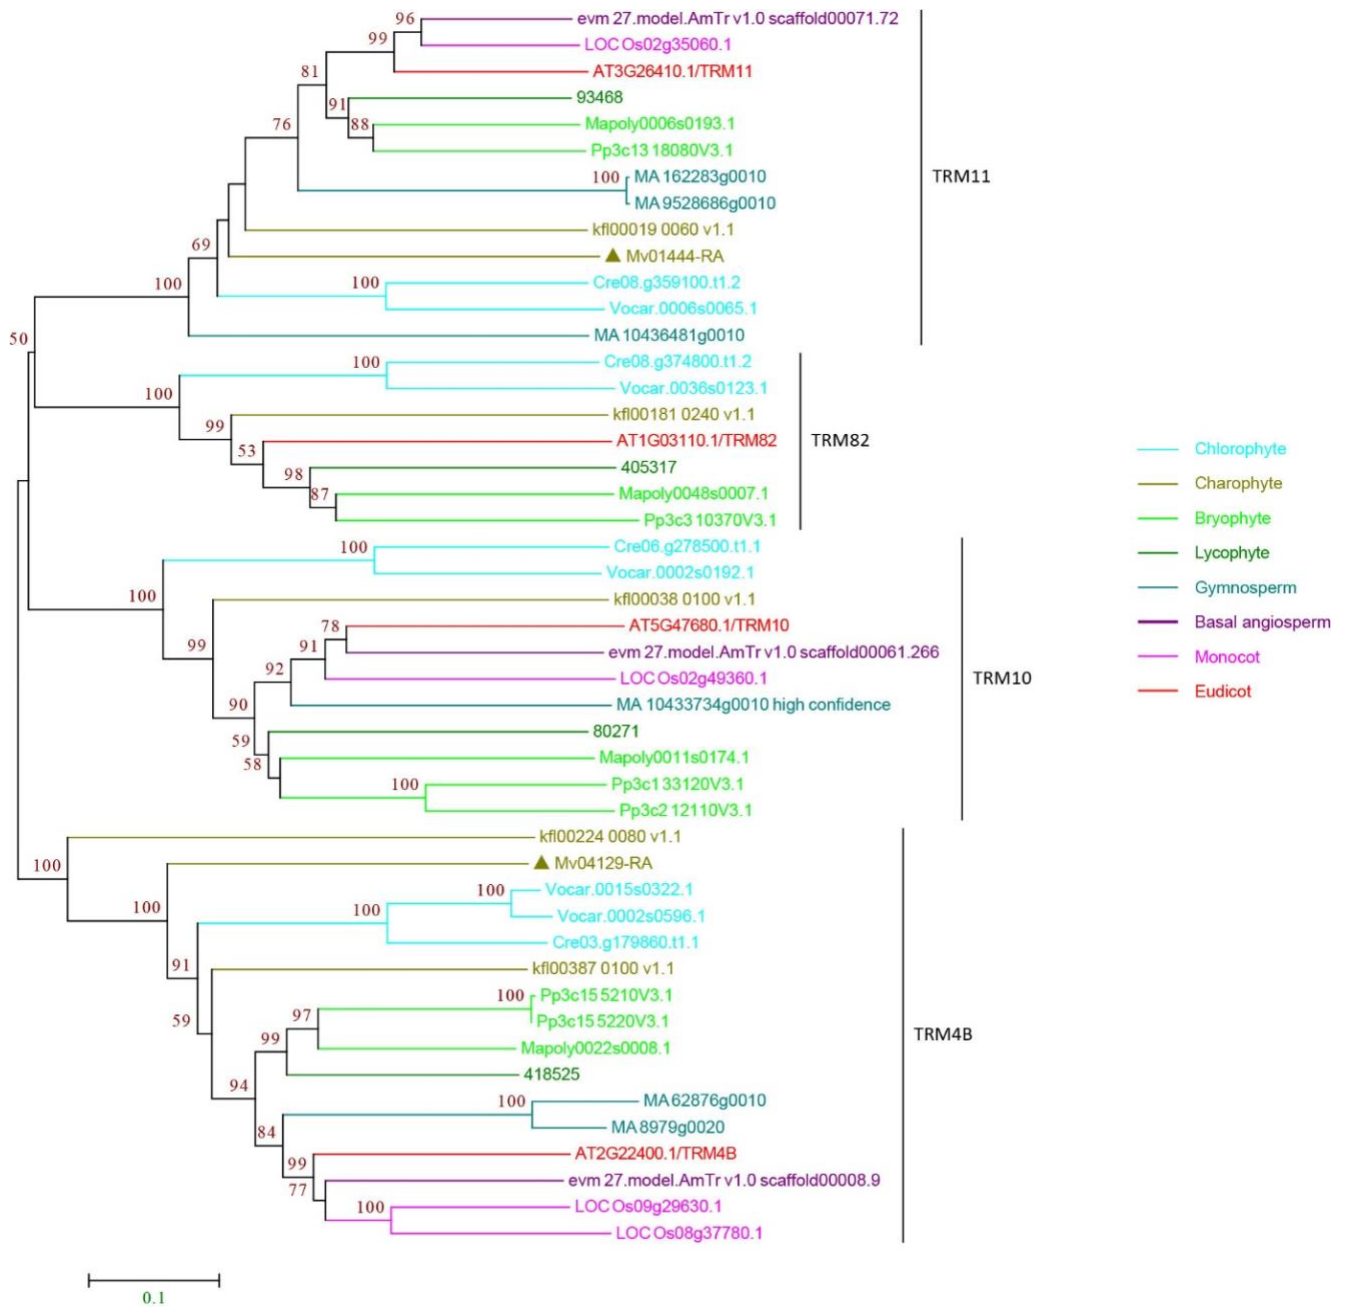

**Data S1AZ.** Phylogenetic relationships of TRNA MODIFICATION (TRM) proteins from *M. viride* and other evolutionarily representative species. The *M. viride* sequences were highlighted by triangles. Numbers on the major branches indicate bootstrap values (> 50%) in 1,000 replicates.

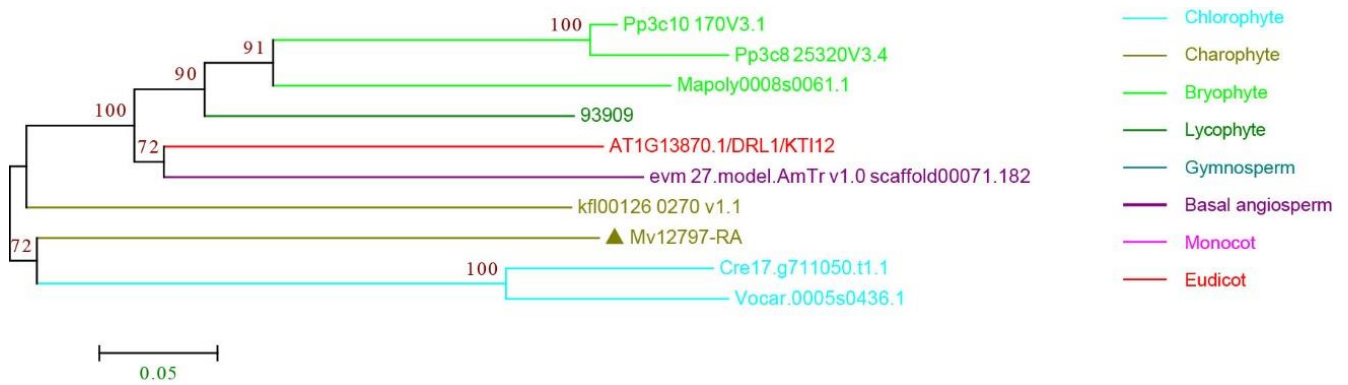

**Data S1BA.** Phylogenetic relationships of DEFORMED ROOTS AND LEAVES 1 (DRL1) proteins from *M. viride* and other evolutionarily representative species. The *M. viride* sequence was highlighted by a triangle. Numbers on the major branches indicate bootstrap values (> 50%) in 1,000 replicates.

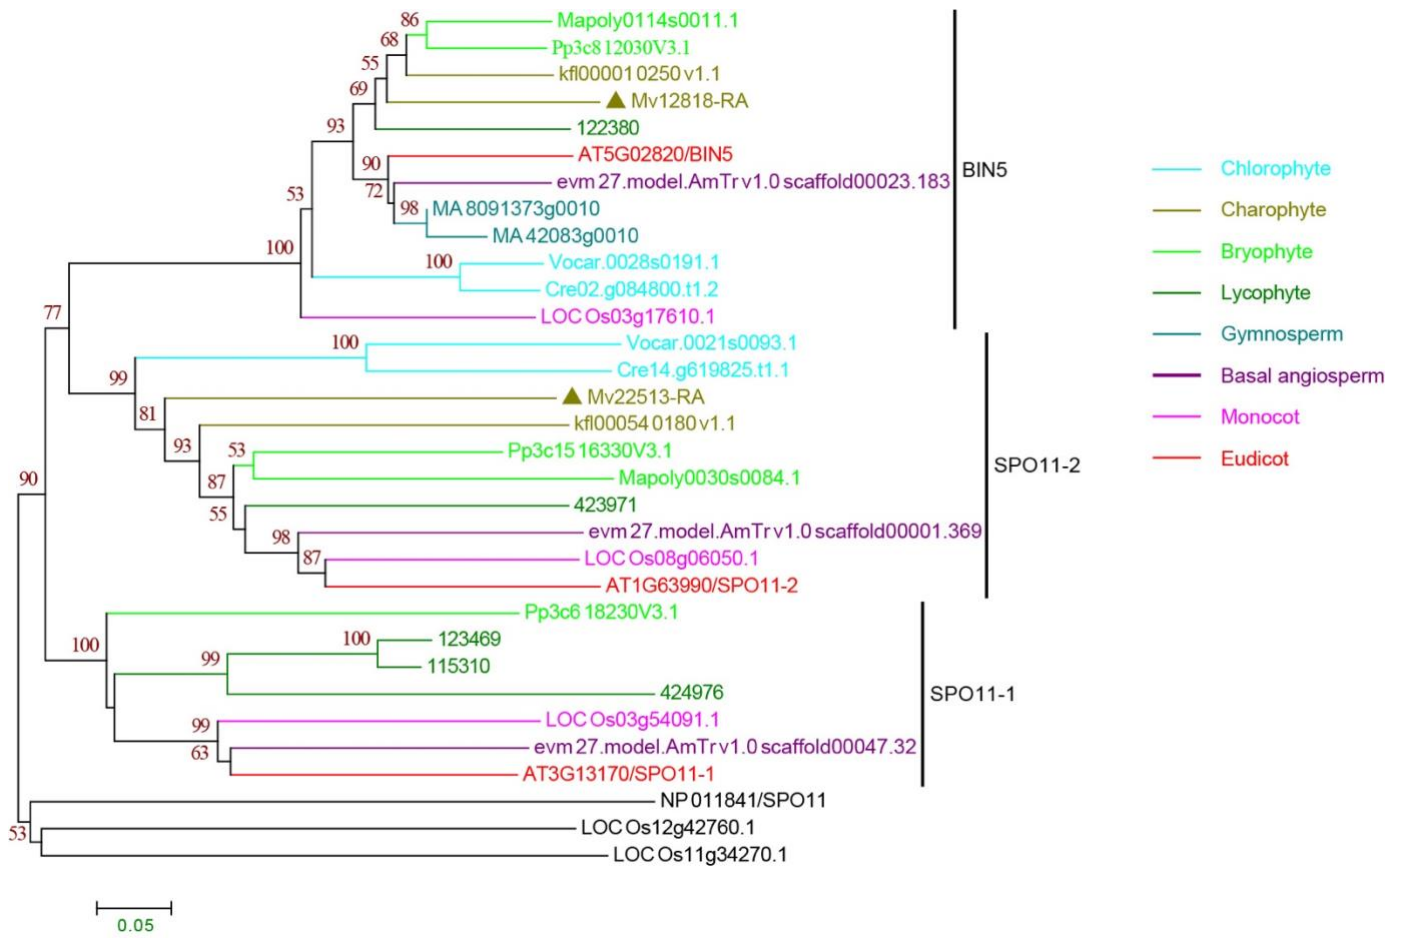

**Data S1BB.** Phylogenetic relationships of SPO11 proteins from *M. viride* and other evolutionarily representative species. The *M. viride* sequence was highlighted by a triangle. Numbers on the major branches indicate bootstrap values (> 50%) in 1,000 replicates.

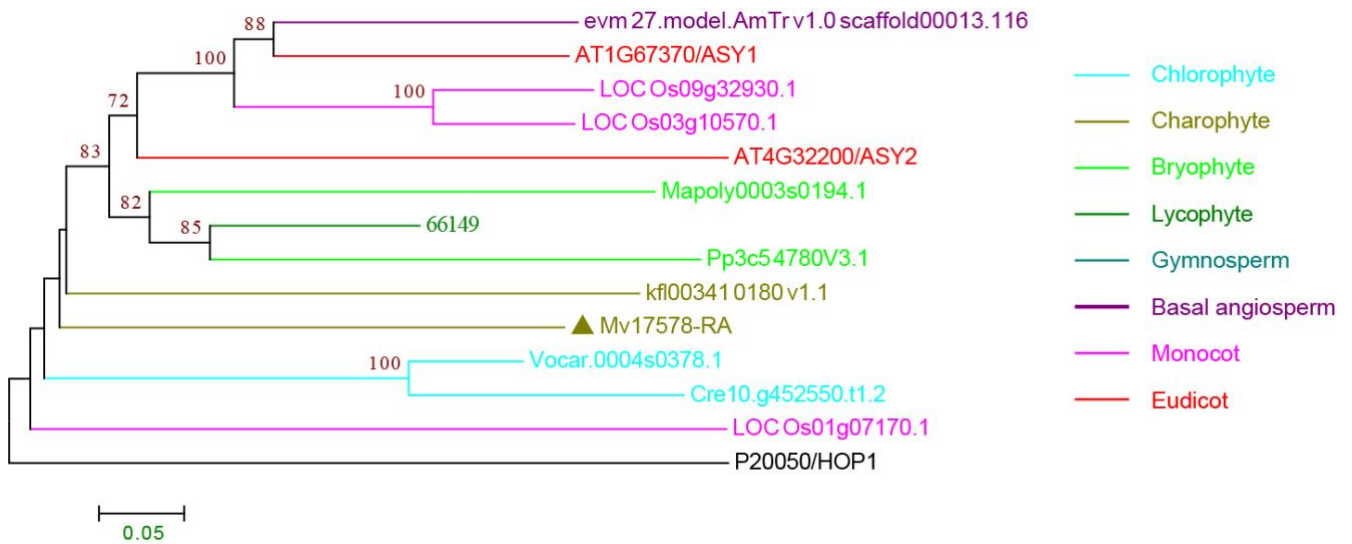

**Data S1BC.** Phylogenetic relationships of HOP1 proteins from *M. viride* and other evolutionarily representative species. The *M. viride* sequence was highlighted by a triangle. Numbers on the major branches indicate bootstrap values (> 50%) in 1,000 replicates.

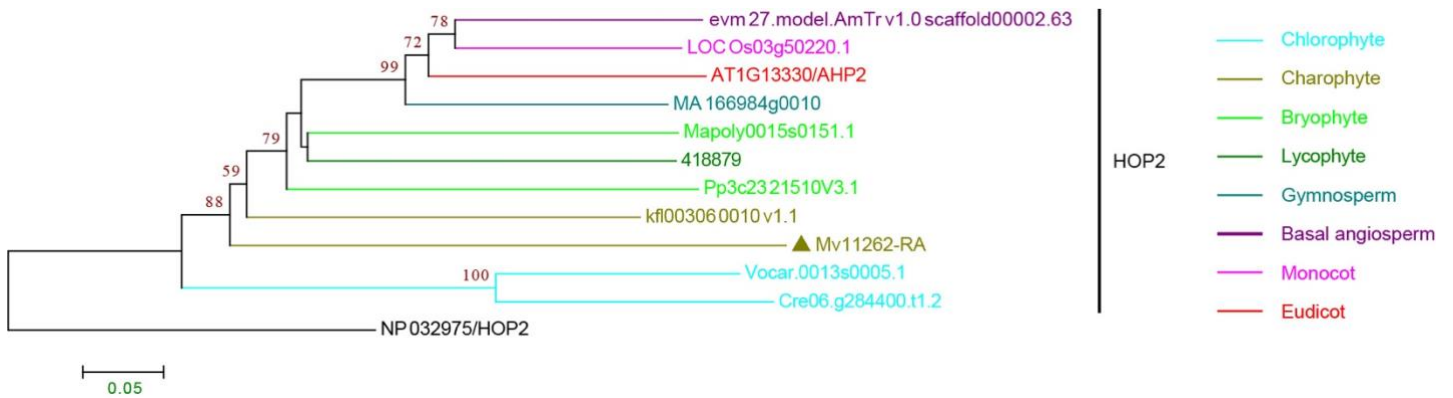

**Data S1BD.** Phylogenetic relationships of HOP2 proteins from *M. viride* and other evolutionarily representative species. The *M. viride* sequence was highlighted by a triangle. Numbers on the major branches indicate bootstrap values (> 50%) in 1,000 replicates.

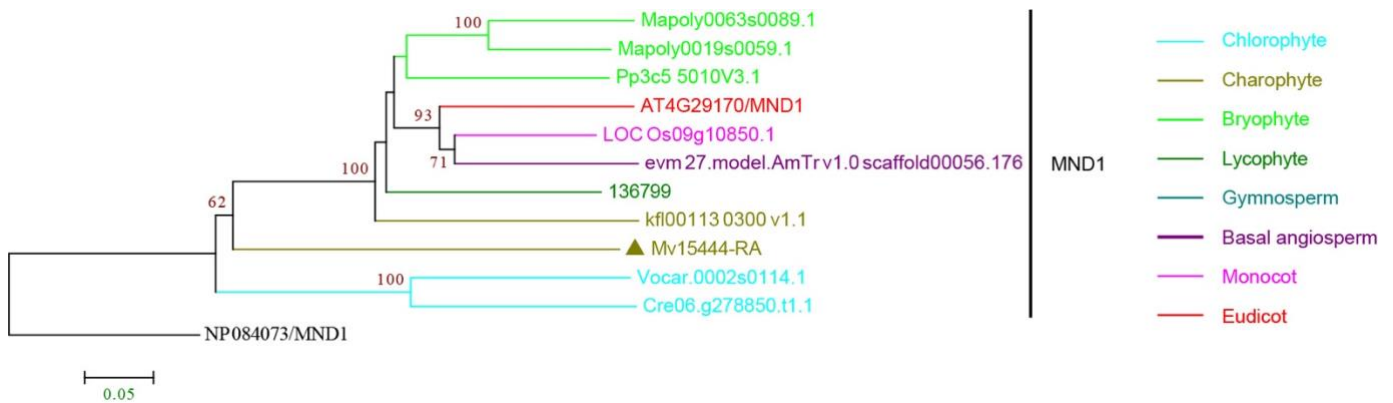

**Data S1BE.** Phylogenetic relationships of meiotic nuclear division protein 1 (MND1) proteins from *M. viride* and other evolutionarily representative species. The *M. viride* sequence was highlighted by a triangle. Numbers on the major branches indicate bootstrap values (> 50%) in 1,000 replicates.

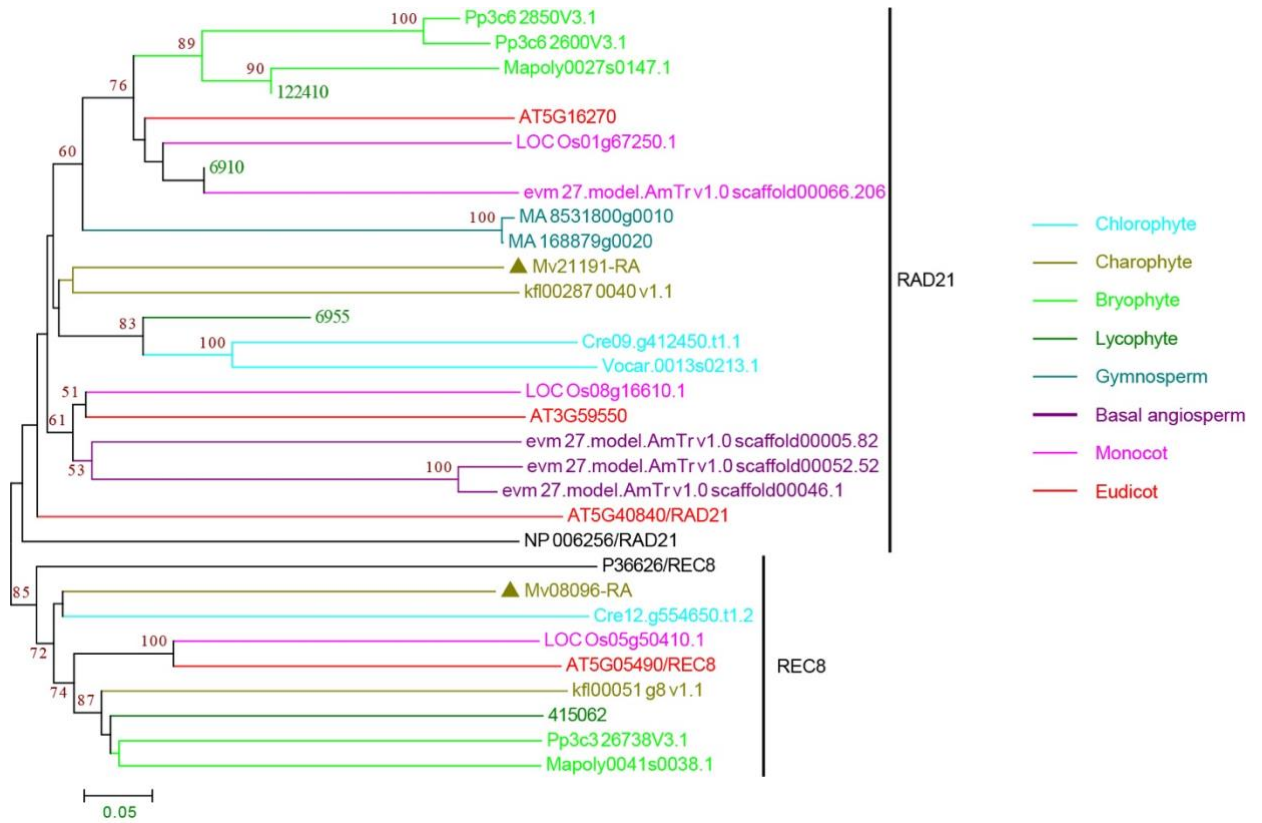

**Data S1BF.** Phylogenetic relationships of REC8 proteins from *M. viride* and other evolutionarily representative species. The *M. viride* sequence was highlighted by a triangle. Numbers on the major branches indicate bootstrap values (> 50%) in 1,000 replicates.

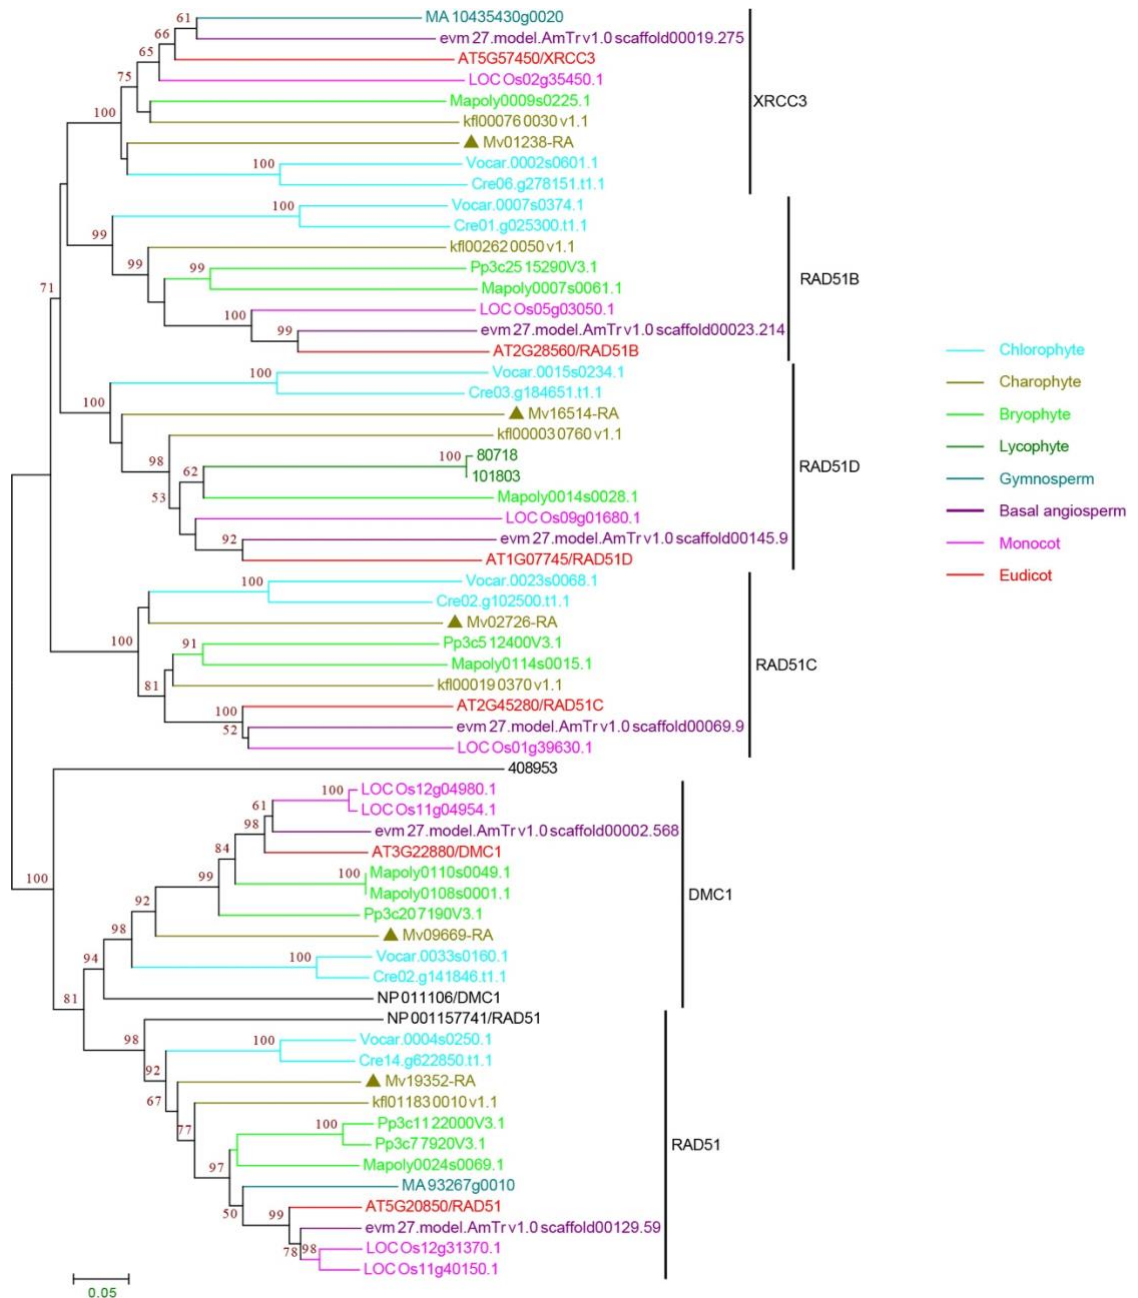

**Data S1BG.** Phylogenetic relationships of DMC1 proteins from *M. viride* and other evolutionarily representative species. The *M. viride* sequence was highlighted by a triangle. Numbers on the major branches indicate bootstrap values (> 50%) in 1,000 replicates.



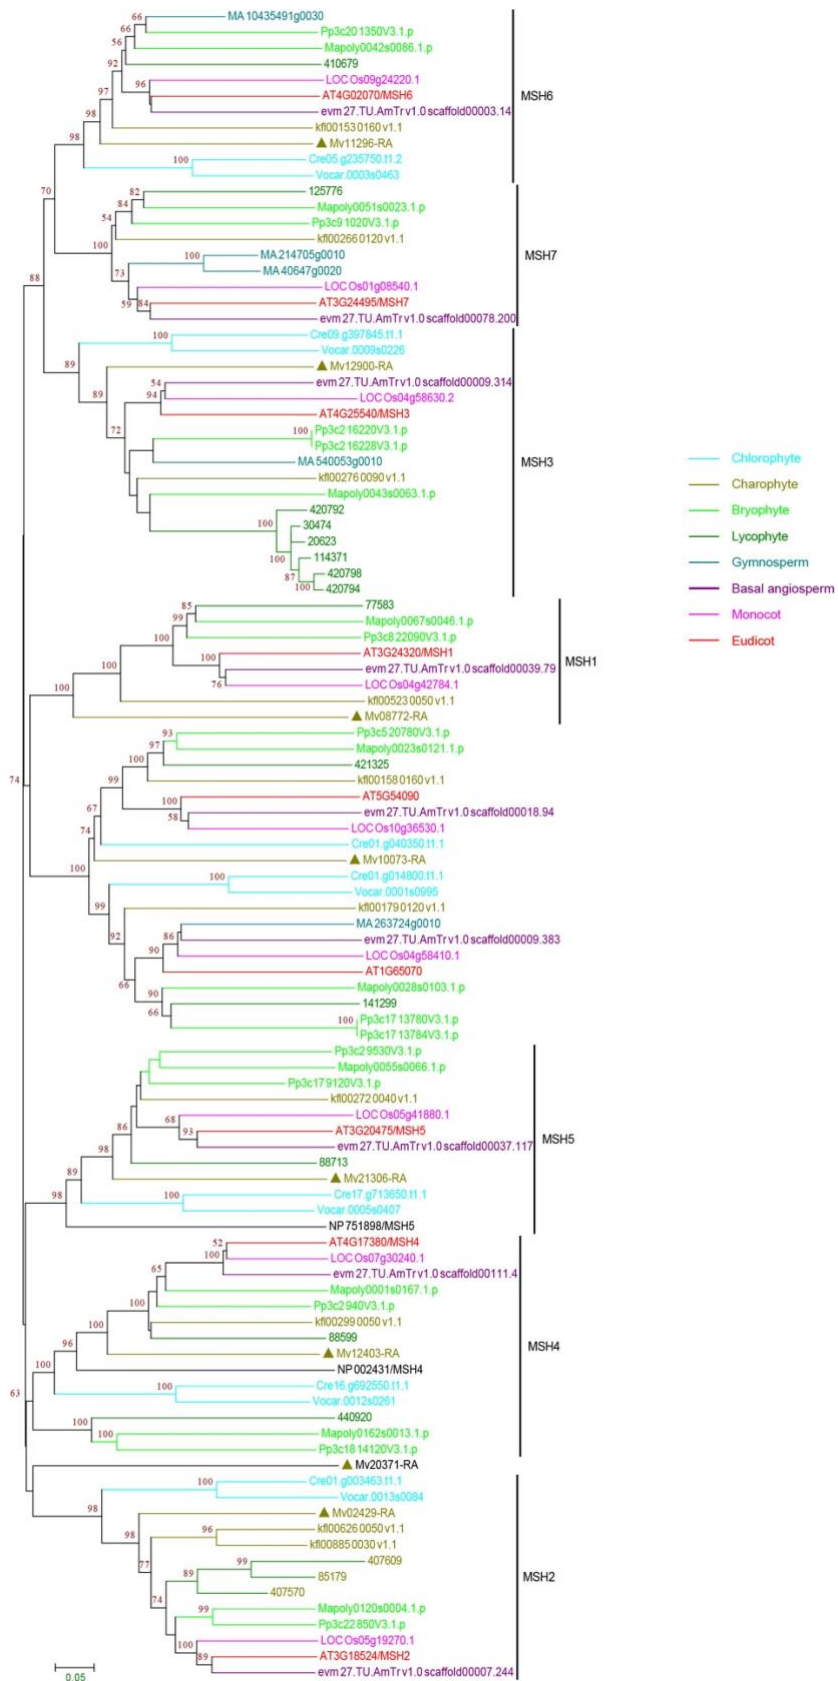

**Data S1BH.** Phylogenetic relationships of MutS protein homolog 4 (MSH4) proteins from *M. viride* and other evolutionarily representative species. The *M. viride* sequence was highlighted by a triangle. Numbers on the major branches indicate bootstrap values (> 50%) in 1,000 replicates.

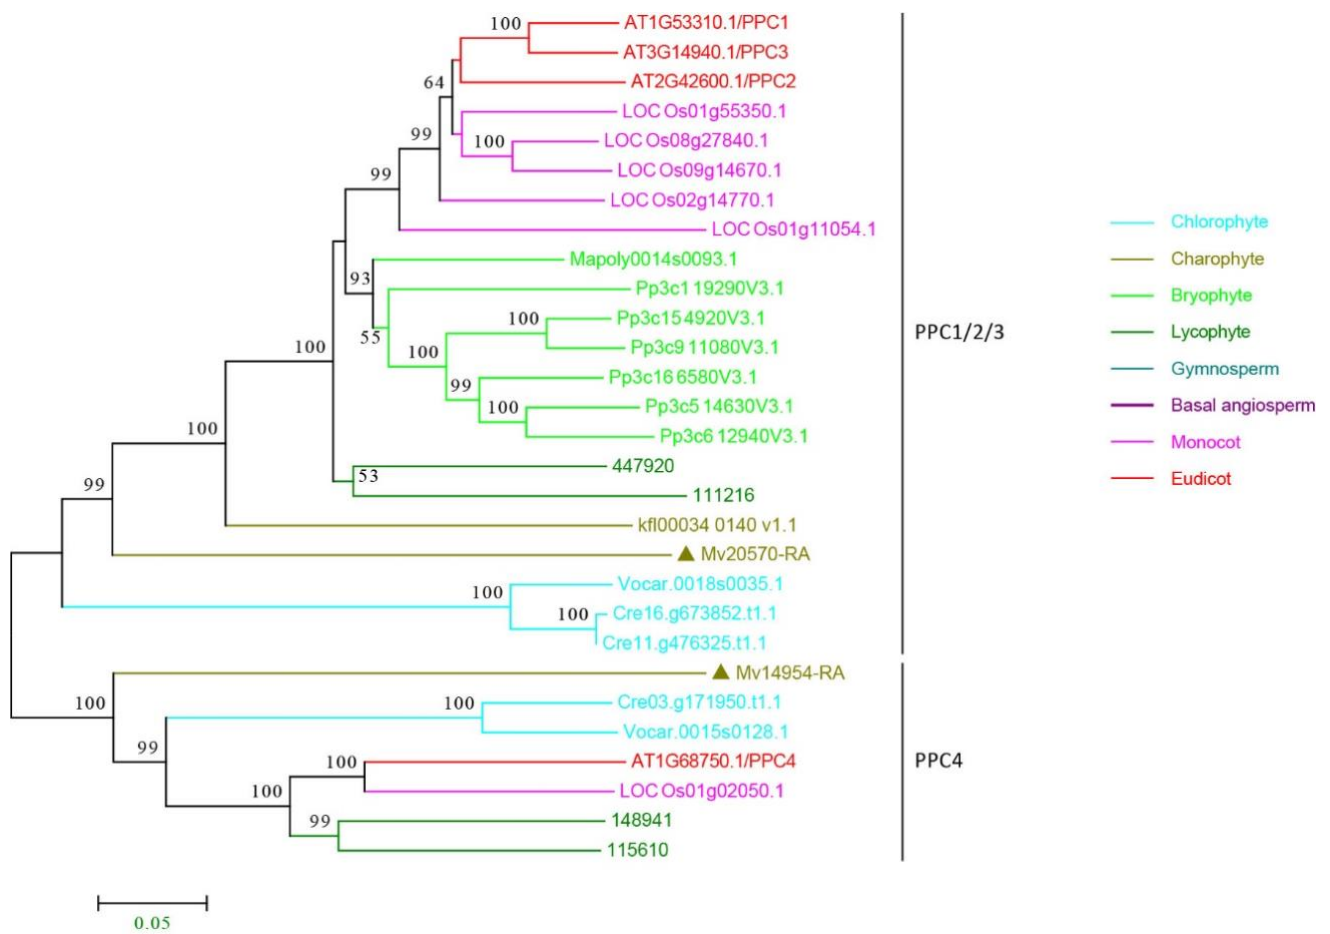

**Data S1BI.** Phylogenetic relationships of PHOSPHOENOLPYRUVATE CARBOXYLASE (PPC) proteins from *M. viride* and other evolutionarily representative species. The *M. viride* sequences were highlighted by triangles. Numbers on the major branches indicate bootstrap values (> 50%) in 1,000 replicates.

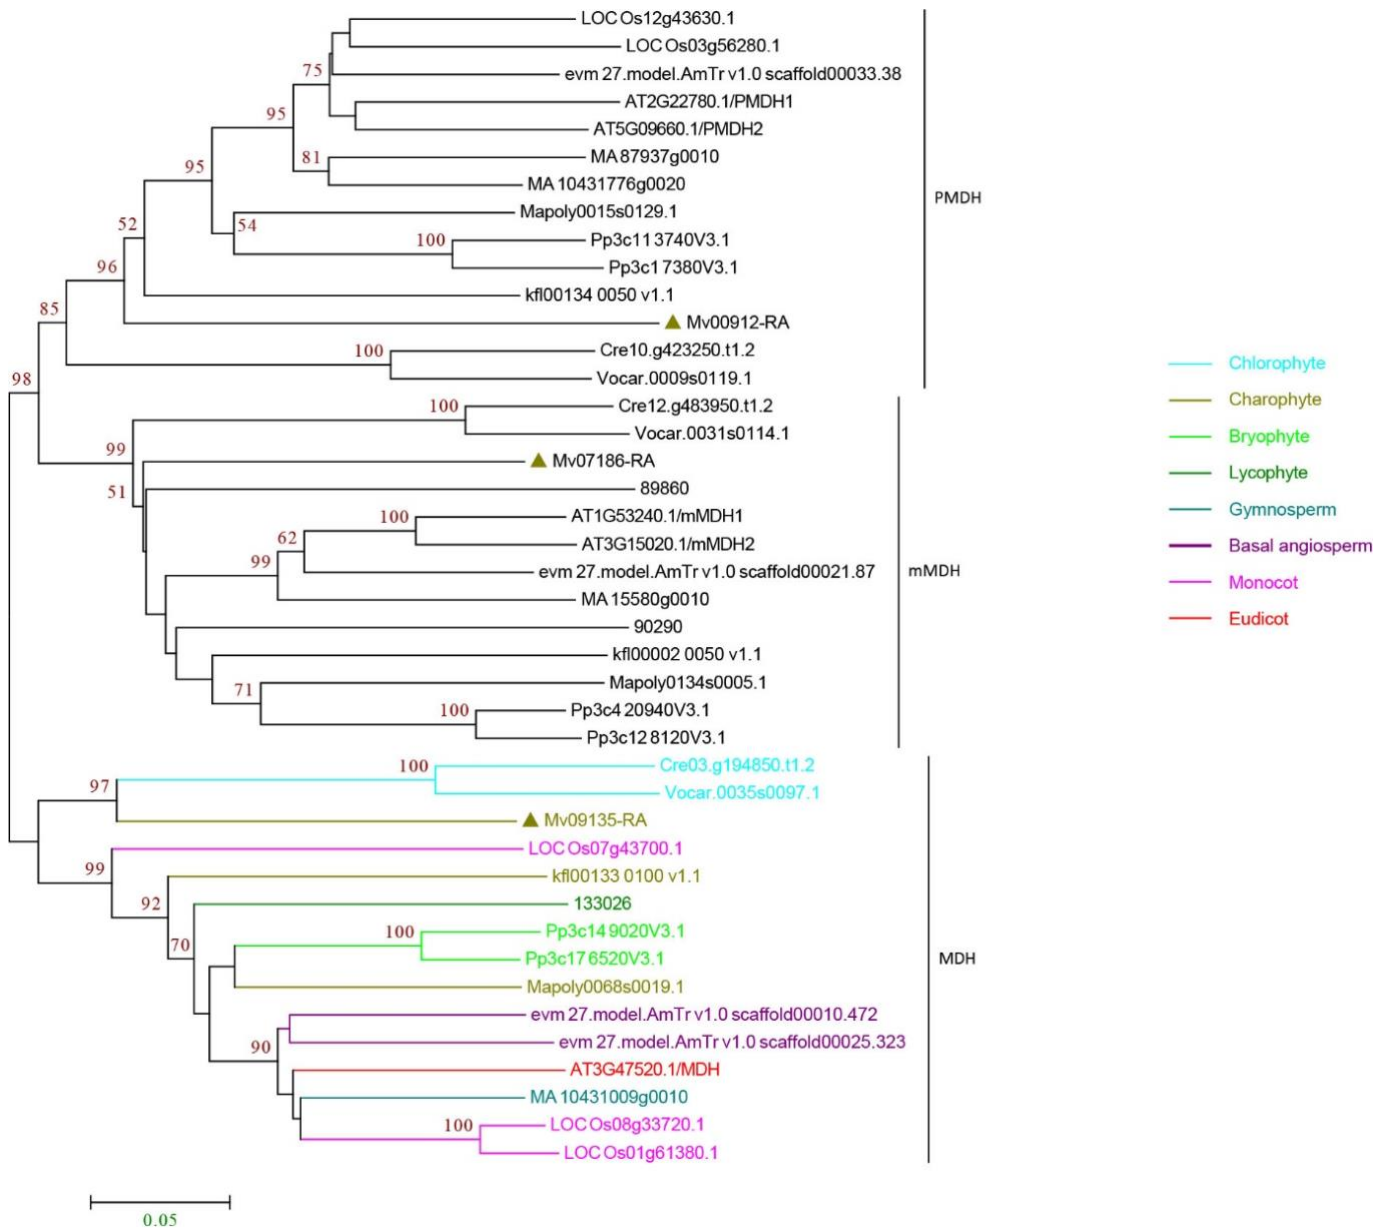

**Data S1BJ.** Phylogenetic relationships of MALATE DEHYDROGENASE (MDH) proteins from *M. viride* and other evolutionarily representative species. The *M. viride* sequences were highlighted by triangles. Numbers on the major branches indicate bootstrap values (> 50%) in 1,000 replicates.

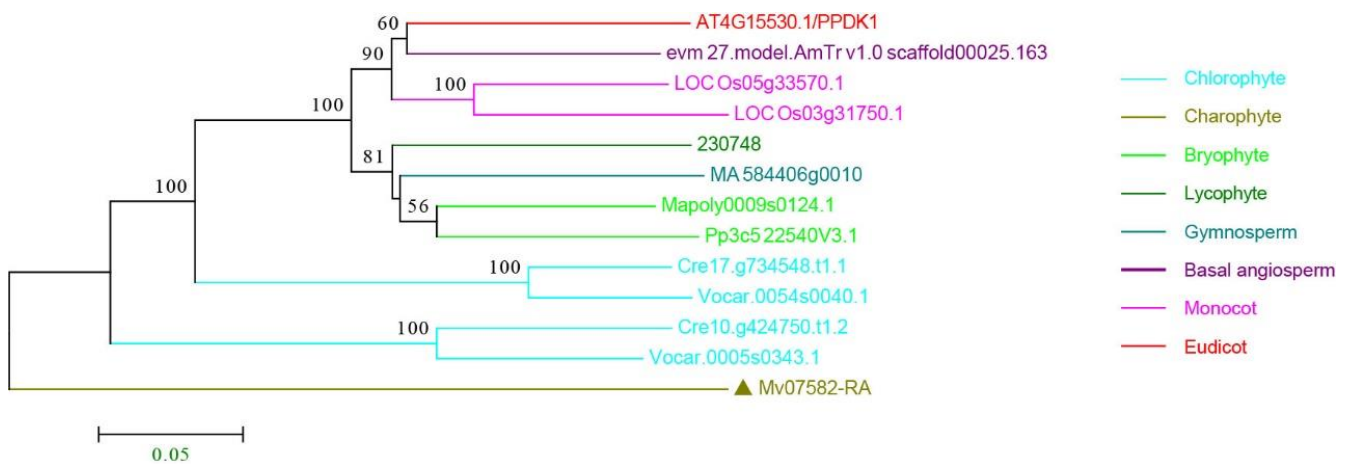

**Data S1BK.** Phylogenetic relationships of PYRUVATE ORTHOPHOSPHATE DIKINASE (PPDK) proteins from *M. viride* and other evolutionarily representative species. The *M. viride* sequence was highlighted by a triangle. Numbers on the major branches indicate bootstrap values (> 50%) in 1,000 replicates.

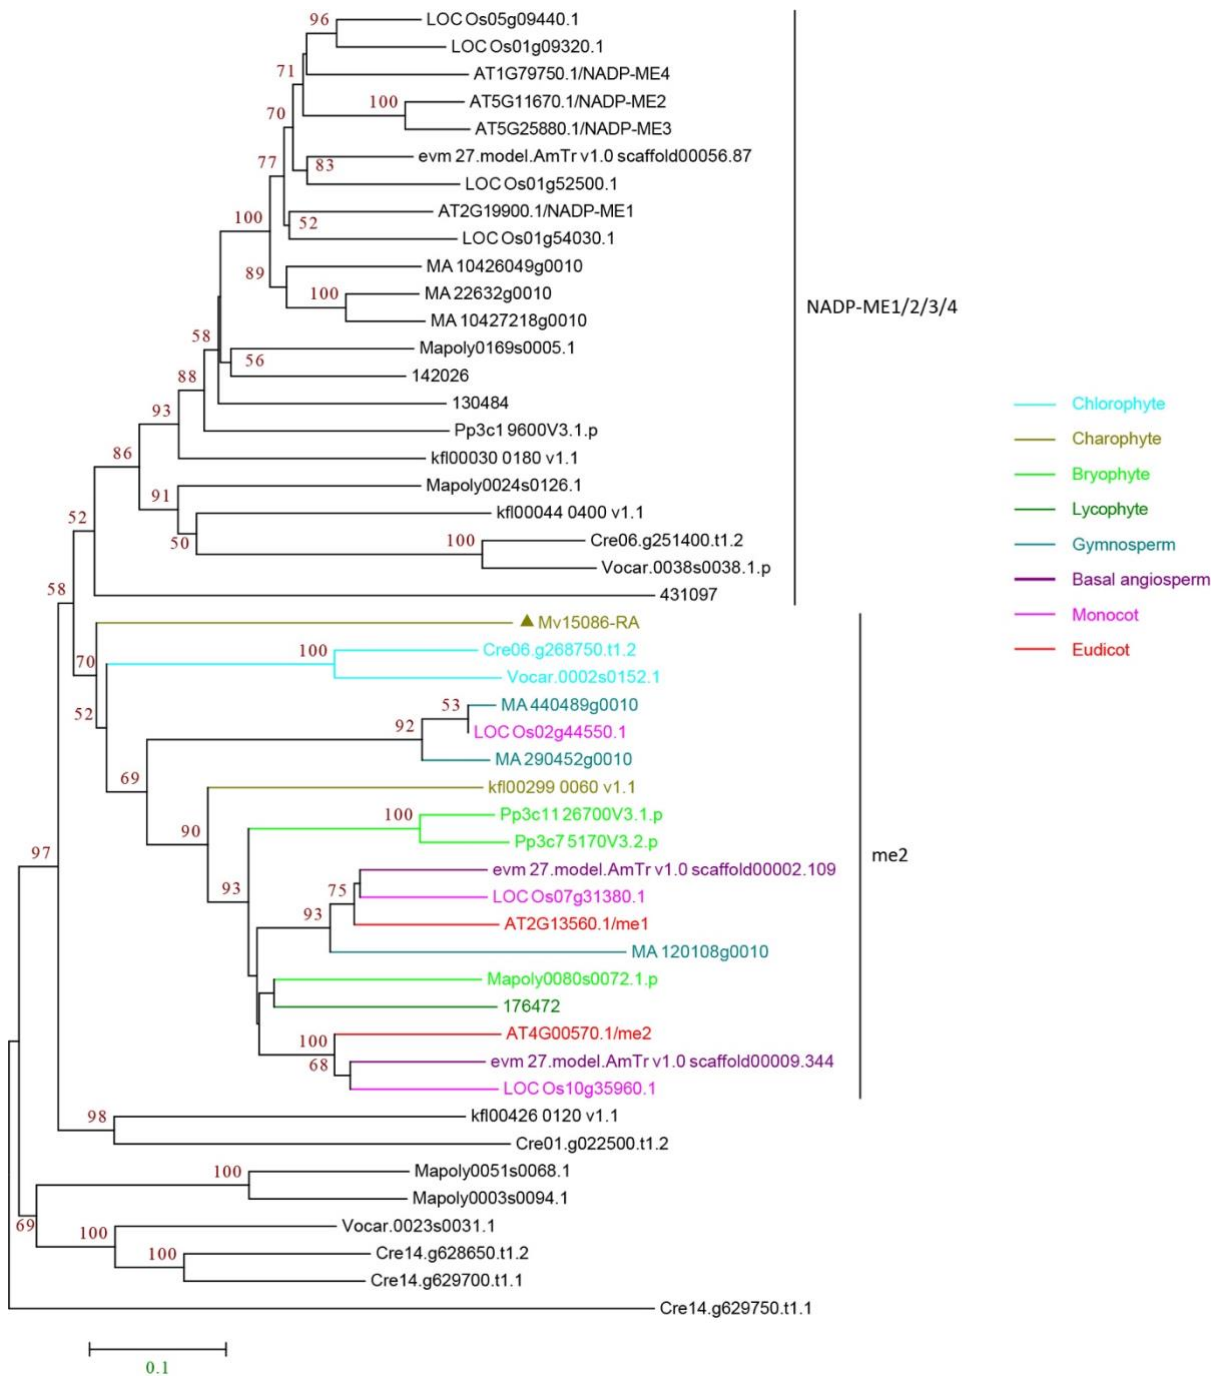

**Data S1BL.** Phylogenetic relationships of MALIC ENZYME 2 (me2) proteins from *M. viride* and other evolutionarily representative species. The *M. viride* sequence was highlighted by a triangle. Numbers on the major branches indicate bootstrap values (> 50%) in 1,000 replicates.

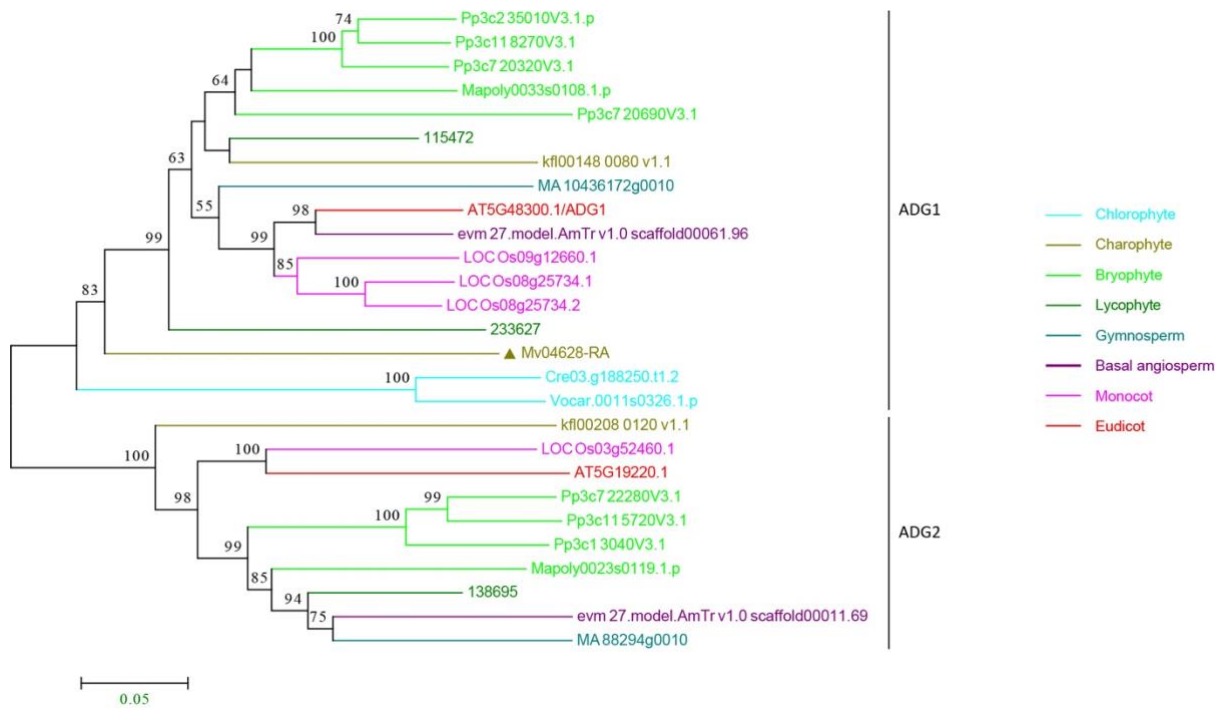

**Data S1BM.** Phylogenetic relationships of ADP GLUCOSE PYROPHOSPHORYLASE (ADG) proteins from *M. viride* and other evolutionarily representative species. The *M. viride* sequence was highlighted by a triangle. Numbers on the major branches indicate bootstrap values (> 50%) in 1,000 replicates.

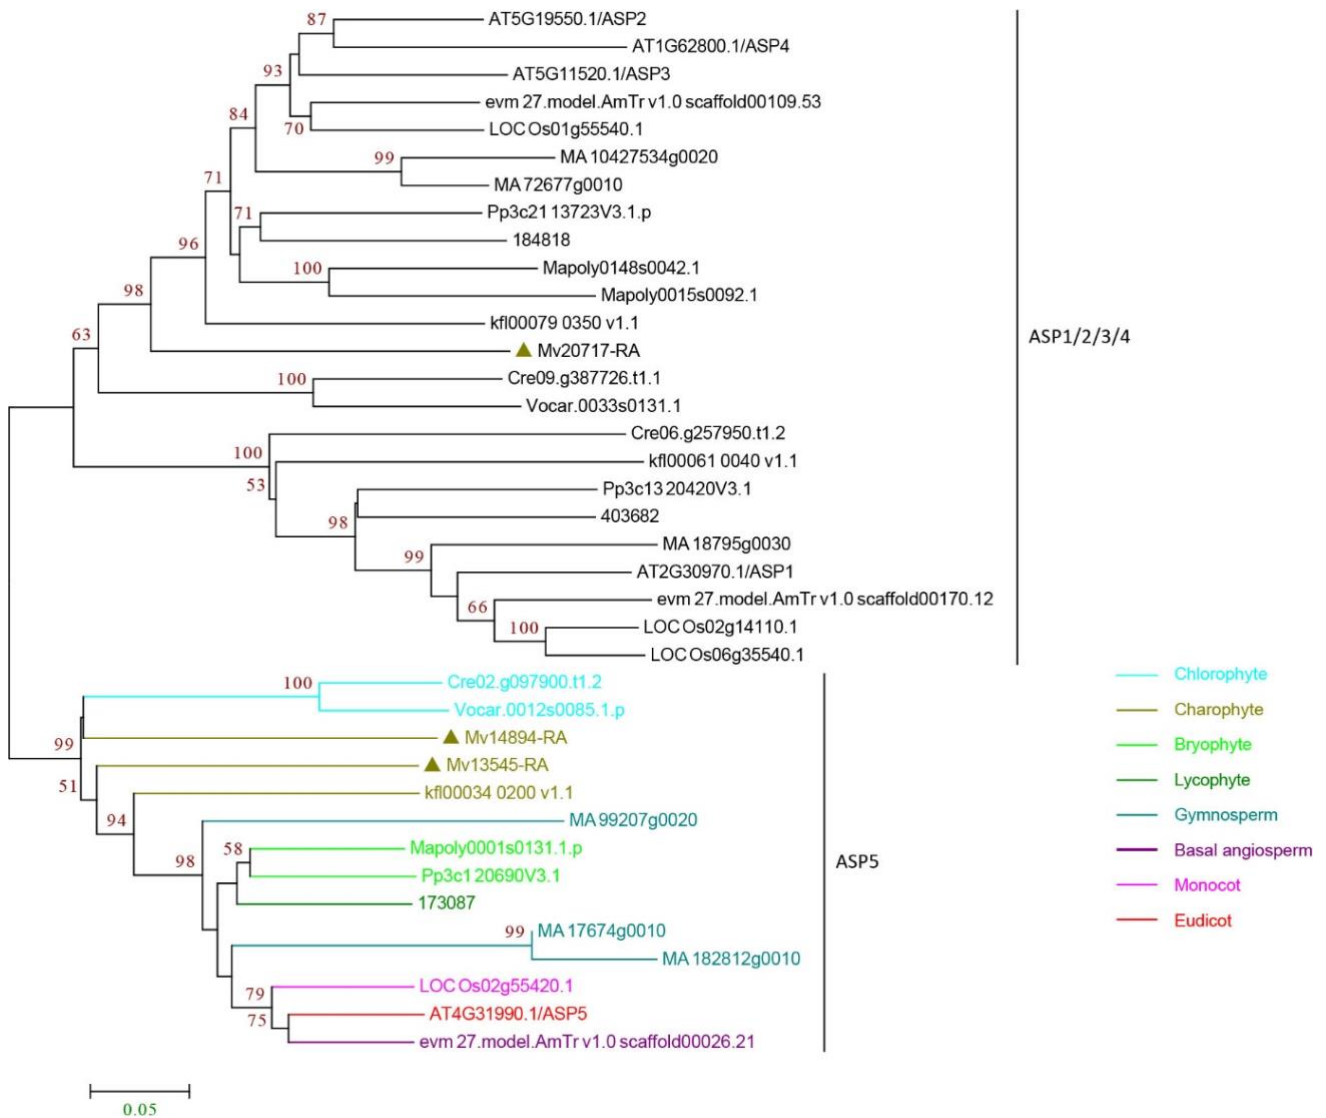

**Data S1BN.** Phylogenetic relationships of ASPARTATE AMINOTRANSFERASE (ASP) proteins from *M. viride* and other evolutionarily representative species. The *M. viride* sequences were highlighted by triangles. Numbers on the major branches indicate bootstrap values (> 50%) in 1,000 replicates.

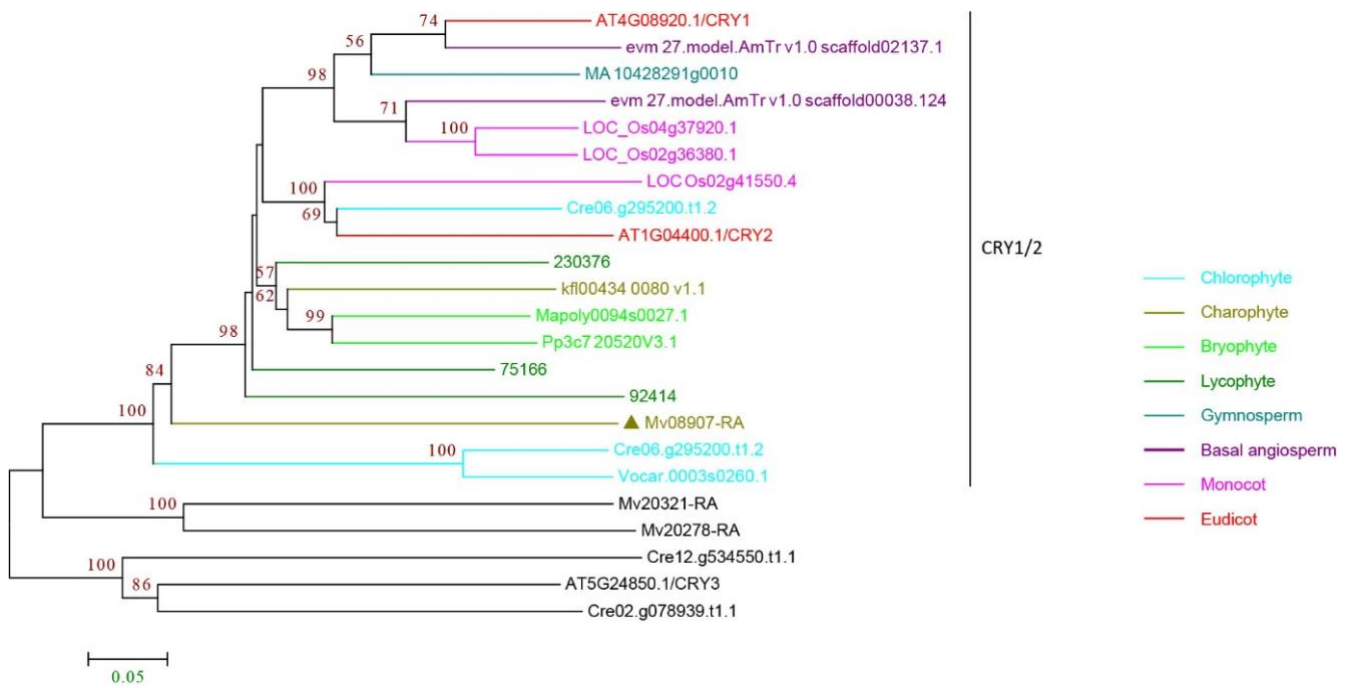

**Data S1BO.** Phylogenetic relationships of CRYPTOCHROME (CRY) proteins from *M. viride* and other evolutionarily representative species. The *M. viride* sequence was highlighted by a triangle. Numbers on the major branches indicate bootstrap values (> 50%) in 1,000 replicates.



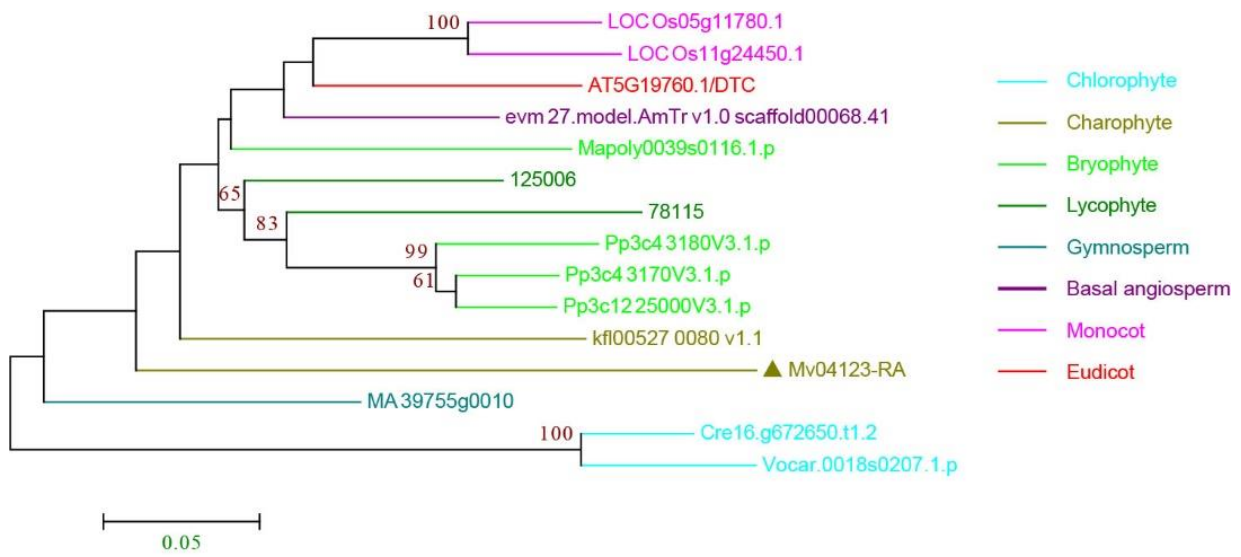

**Data S1BP.** Phylogenetic relationships of DTC proteins from *M. viride* and other evolutionarily representative species. The *M. viride* sequence was highlighted by a triangle. Numbers on the major branches indicate bootstrap values (> 50%) in 1,000 replicates.

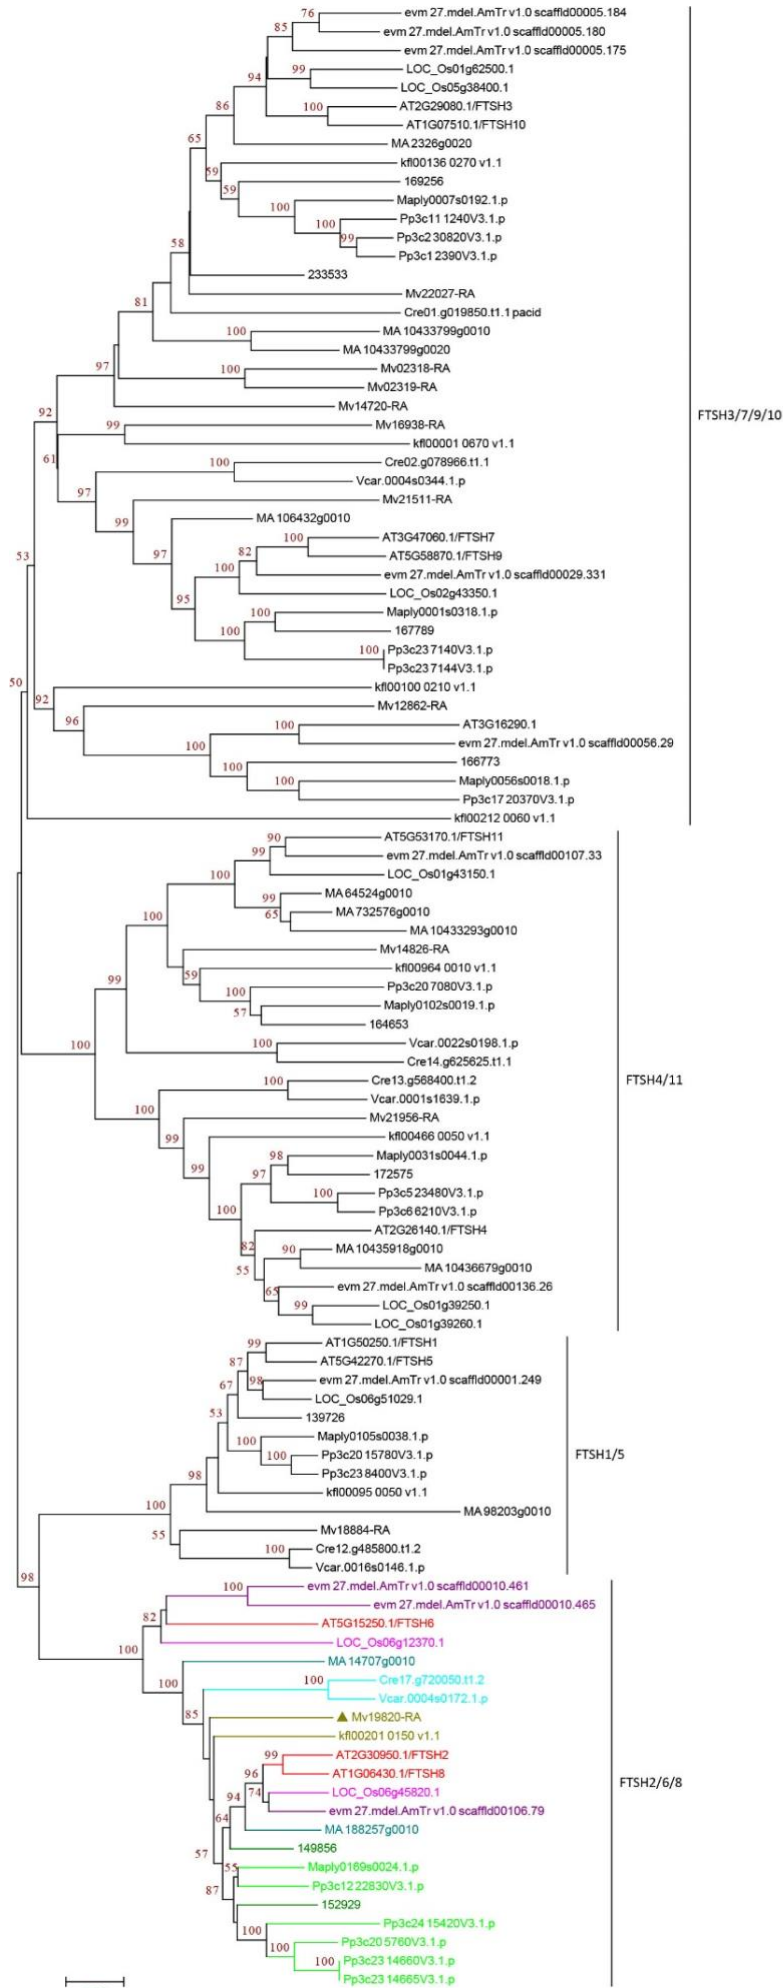

- Chlorophyte
- Charophyte
- Bryophyte
- Lycophyte
- Gymnosperm
- Basal angiosperm
- Monocot
- Eudicot

**Data S1BQ.** Phylogenetic relationships of FTSH proteins from *M. viride* and other evolutionarily representative species. The *M. viride* sequence was highlighted by a triangle. Numbers on the major branches indicate bootstrap values (> 50%) in 1,000 replicates.

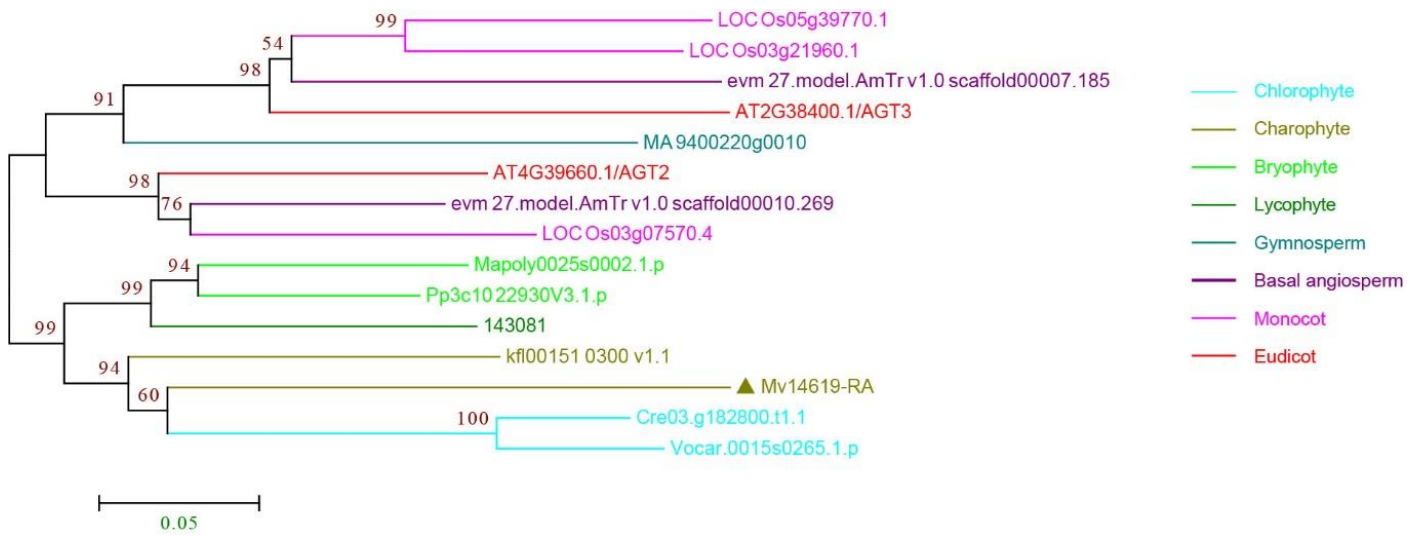

**Data S1BR.** Phylogenetic relationships of ALANINE:GLYOXYLATE AMINOTRANSFERASE (AGT) proteins from *M. viride* and other evolutionarily representative species. The *M. viride* sequence was highlighted by a triangle. Numbers on the major branches indicate bootstrap values (> 50%) in 1,000 replicates.

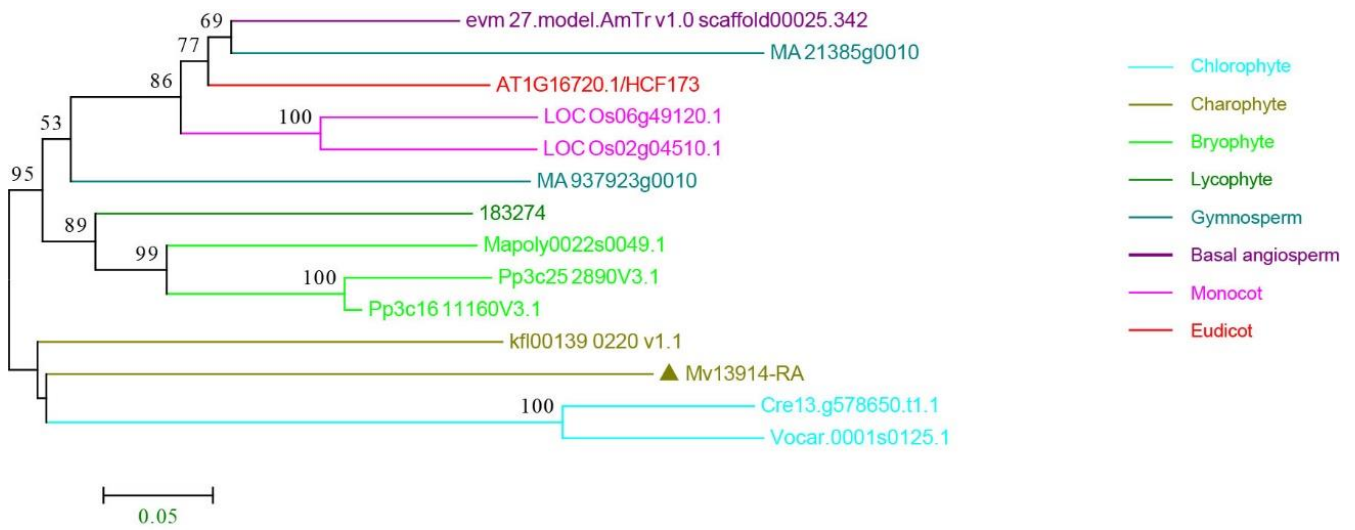

**Data S1BS.** Phylogenetic relationships of HIGH CHLOROPHYLL FLUORESCENCE PHENOTYPE 173 (HCF173) proteins from *M. viride* and other evolutionarily representative species. The *M. viride* sequence was highlighted by a triangle. Numbers on the major branches indicate bootstrap values (> 50%) in 1,000 replicates.

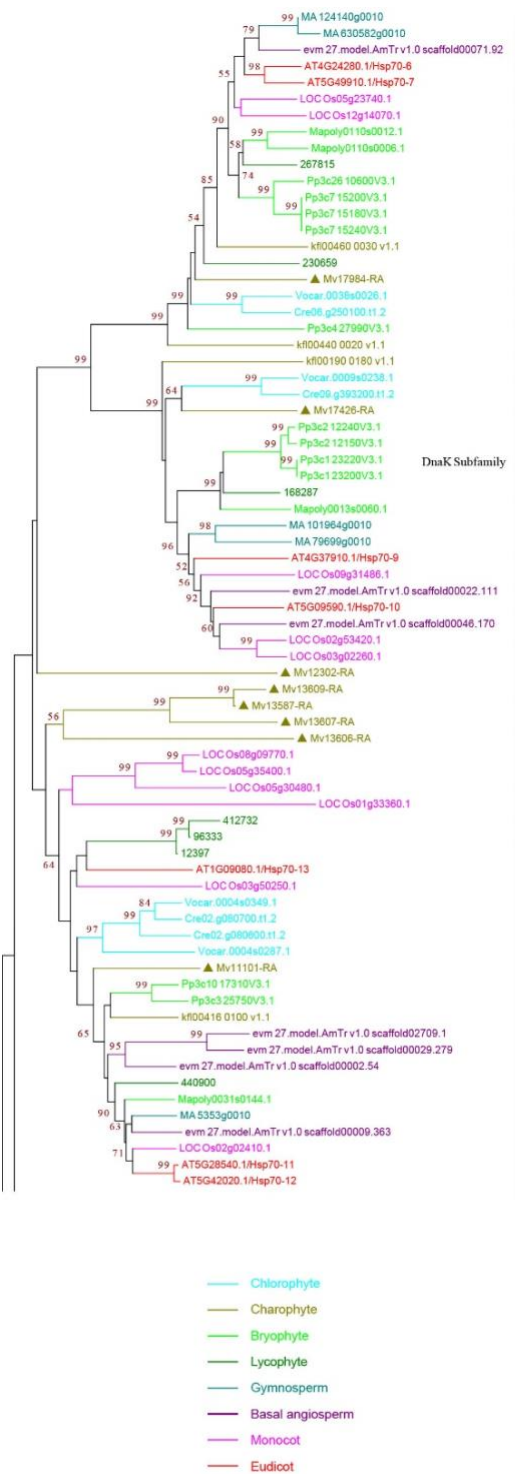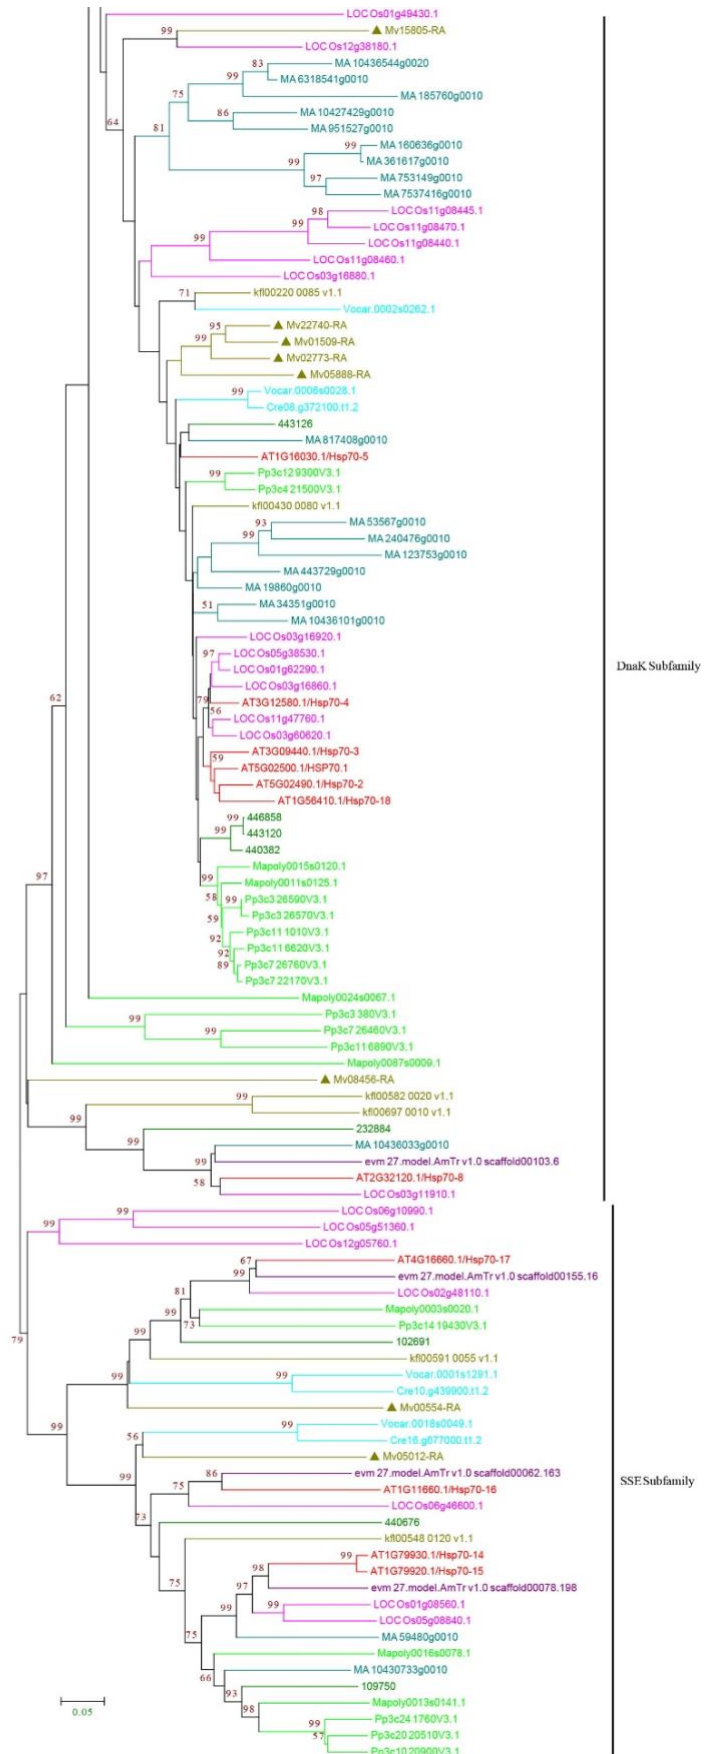

**Data S1BT.** Phylogenetic relationships of heat shock protein 70 (HSP70) proteins from *M. viride* and other evolutionarily representative species. The *M. viride* sequences were highlighted by triangles. Numbers on the major branches indicate bootstrap values (> 50%) in 1,000 replicates.

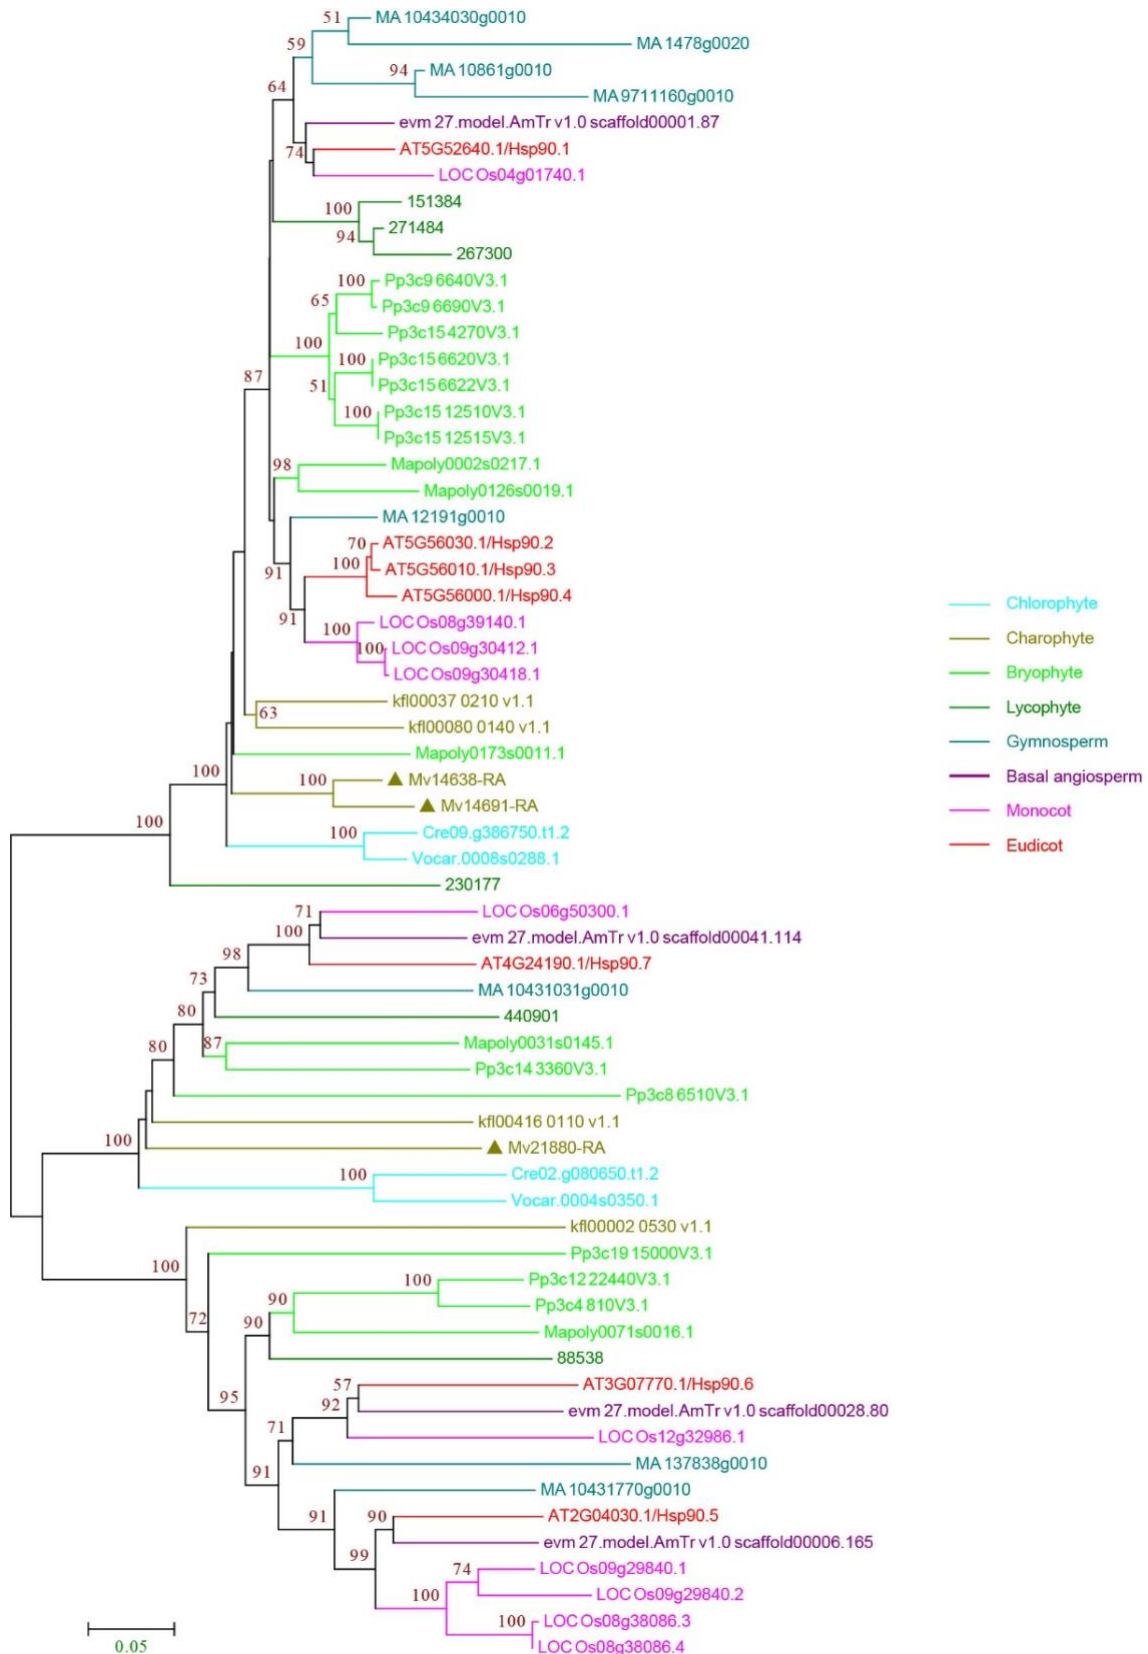

**Data S1BU.** Phylogenetic relationships of heat shock protein 90 (HSP90) proteins from *M. viride* and other evolutionarily representative species. The *M. viride* sequences were highlighted by triangles. Numbers on the major branches indicate bootstrap values (> 50%) in 1,000 replicates.

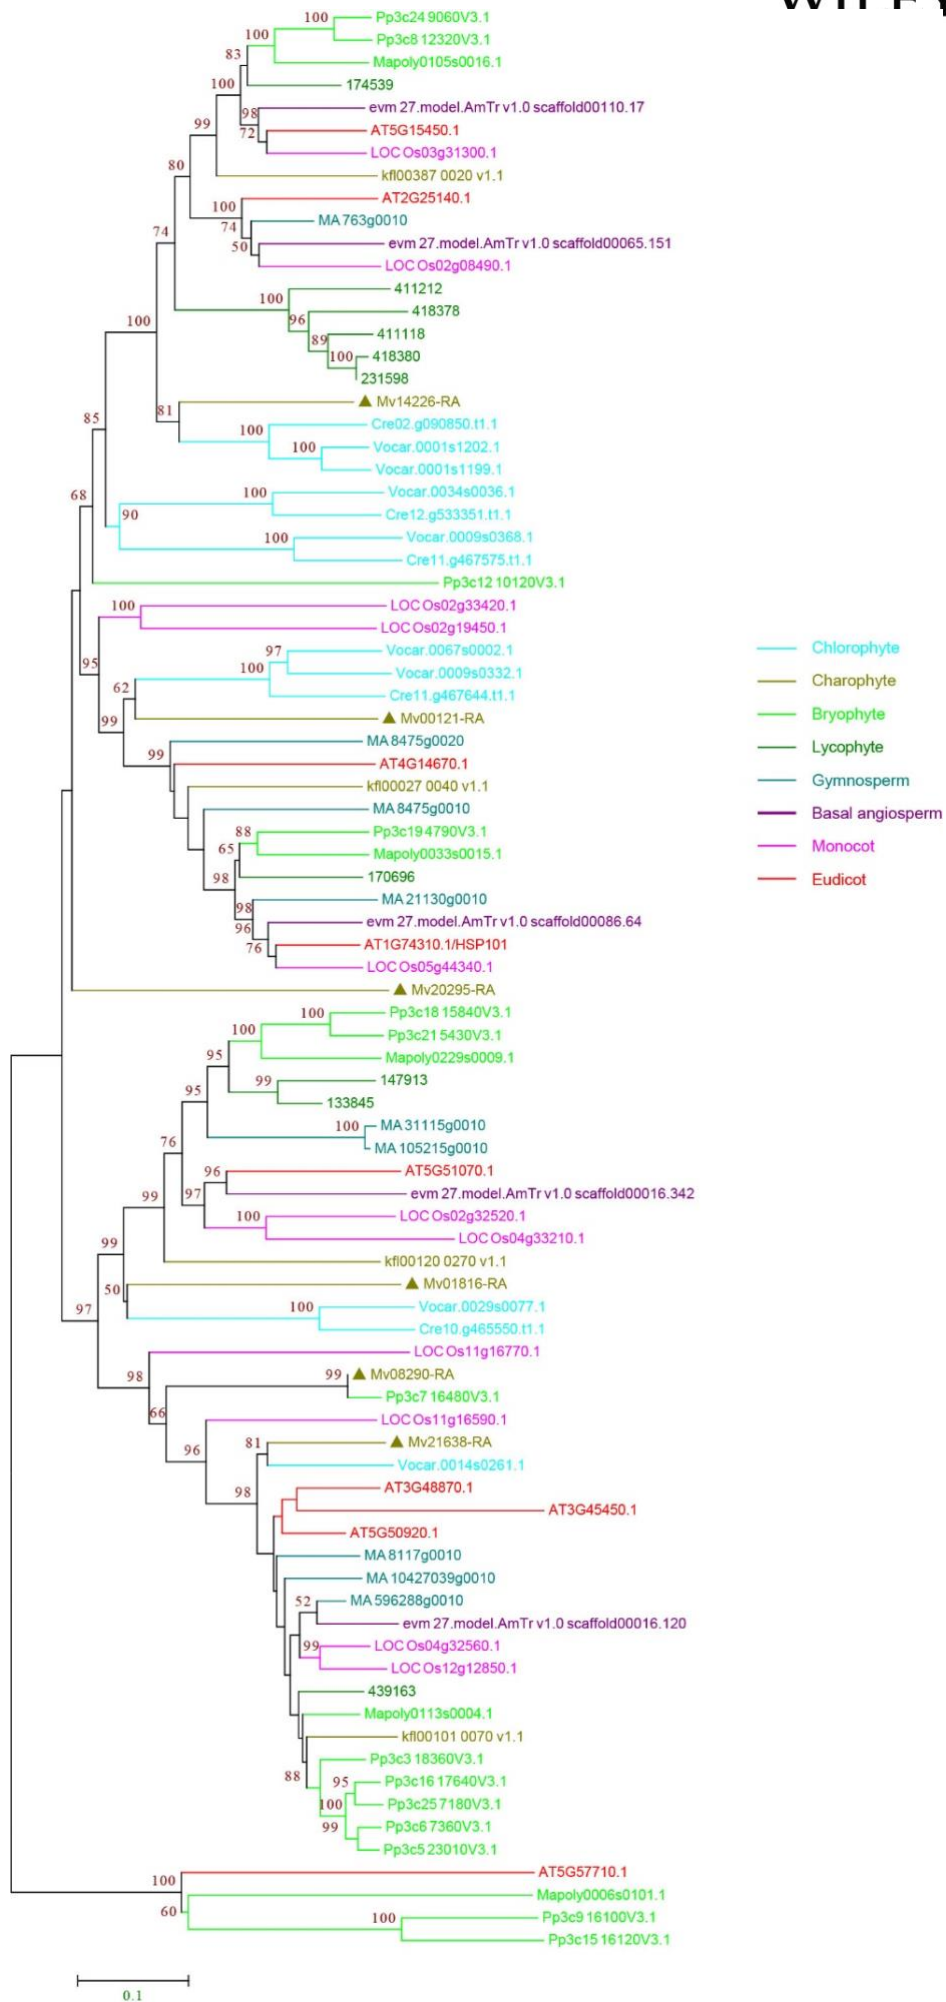



**Data S1BV.** Phylogenetic relationships of heat shock protein 100 (HSP100) proteins from *M. viride* and other evolutionarily representative species. The *M. viride* sequences were highlighted by triangles. Numbers on the major branches indicate bootstrap values (> 50%) in 1,000 replicates.

## References

- [1] H. Du, Z. Liang, S. Zhao, M. G. Nan, L. S. Tran, K. Lu, Y. B. Huang, J. N. Li, *Sci. Rep.* **2015**, *5*, 11037.
- [2] N. Pires, L. Dolan, *Mol. Biol. Evol.* **2010**, *27*, 862.
- [3] J. K. Okamoto, B. Caster, R. Villarroel, M. Van Montagu, K. D. Jofuku, *Proc. Natl. Acad. Sci. USA* **1997**, *94*, 7076.
- [4] F. Licausi, M. Ohme-Takagi, P. Perata, *New Phytol.* **2013**, *199*, 639.
- [5] K.-J. Dietz, M. O. Vogel, A. Viehhauser, *Protoplasma* **2010**, *245*, 3.
- [6] T. Nakano, K. Suzuki, T. Fujimura, H. Shinshi, *Plant Physiol.* **2006**, *140*, 411.
- [7] A. Safi, A. Medici, W. Szponarski, S. Ruffel, B. Lacombe, G. Krouk, *Curr. Opin. Plant Biol.* **2017**, *39*, 159.
- [8] M. Jakoby, B. Weisshaar, W. Dröge-Laser, J. Vicente-Carbajosa, J. Tiedemann, T. Kroj, F. Parcy, *Trends Plant Sci.* **2002**, *7*, 106.
- [9] W. Dröge-Laser, B. L. Snoek, B. Snel, C. Weiste, *Curr. Opin. Plant Biol.* **2018**, *45*, 36.
- [10] K. Swaminathan, K. Peterson, T. Jack, *Trends Plant Sci.* **2008**, *13*, 647.
- [11] Y. Wang, D. Deng, R. Zhang, S. Wang, Y. Bian, Z. Yin, *Mol. Biol. Rep.* **2012**, *39*, 6267.
- [12] F. Y. Peng, R. J. Weselake, *Theor. Appl. Genet.* **2013**, *126*, 1305.
- [13] E. Morgunova, Y. Yin, A. Jolma, K. Dave, B. Schmierer, A. Popov, N. Eremina, L. Nilsson, J. Taipale, *Nat. Commun.* **2015**, *6*, 10050.
- [14] R. Rauber, C. Cabreira, L. B. de Freitas, A. C. Turchetto-Zolet, M. Margis-Pinheiro, *Mol. Phylogenet. Evol.* **2016**, *99*, 225.
- [15] P. von Koskull-Doring, K. D. Scharf, L. Nover, *Trends Plant Sci.* **2007**, *12*, 452.
